# Supplementary material for: The landscape of coadaptation in Vibrio parahaemolyticus
Source: eLife. 2020 Mar 20;9:e54136. doi: 10.7554/eLife.54136 (PMC7101233; doi:10.7554/eLife.54136)
Supplement: Supplementary file 2. [file elife-54136-supp2.xlsx]

## Sheet: Sheet1
Supplementary File 2. Detailed information of coadaptation variants in IG2-90.
IG	Linkage strength (-log p-value)	IG Type	Gene	Gene type	Function	COG	KEGG	Maped Chromosome	Start position	End position	Mapped gene	RIMD 2210633 gene
IG2	57	Compatibility	group_2234	Accessory	integral membrane protein transporter	{COG1593 TRAP-type C4-dicarboxylate transport system, large permease component G Carbohydrate transport and metabolism ;}	{NA}	NC_004605.1	1822695	1823996	VPA1704	VPA1704
IG2	57	Compatibility	group_3294	Accessory	keto-hydroxyglutarate-aldolase/keto-deoxy-phosphogluconate aldolase	{COG0800 2-keto-3-deoxy-6-phosphogluconate aldolase G Carbohydrate transport and metabolism ;}	{VV2_1072 K01625 4.1.3.16 4.1.2.14 vvu00630 Glyoxylate and dicarboxylate metabolism - Vibrio vulnificus CMCP6 Metabolism; Carbohydrate Metabolism}	NC_004605.1	1827927	1828556	VPA1708	VPA1708
IG2	57	Compatibility	yiaO	Accessory	2-dehydro-3-deoxygluconokinase	{COG0524 Sugar kinases, ribokinase family G Carbohydrate transport and metabolism ;}	{VPA1707 K00874 2.7.1.45 vpa00040 Pentose and glucuronate interconversions - Vibrio parahaemolyticus Metabolism; Carbohydrate Metabolism}	NC_004605.1	1826940	1827917	VPA1707	VPA1707
IG2	57	Compatibility	lutR	Accessory	transcriptional regulatory protein	{COG2186 Transcriptional regulators K Transcription ;}	{NA}	NC_004605.1	1819964	1820755	VPA1701	VPA1701
IG2	57	Compatibility	ygjV_1	Accessory	mannonate oxidoreductase	{COG0246 Mannitol-1-phosphate/altronate dehydrogenases G Carbohydrate transport and metabolism ;}	{VPA1705 K00040 1.1.1.57 vpa00040 Pentose and glucuronate interconversions - Vibrio parahaemolyticus Metabolism; Carbohydrate Metabolism}	NC_004605.1	1824048	1825514	VPA1705	VPA1705
IG2	57	Compatibility	uxaC	Accessory	glucuronate isomerase	{COG1904 Glucuronate isomerase G Carbohydrate transport and metabolism ;}	{VPA1706 K01812 5.3.1.12 vpa00040 Pentose and glucuronate interconversions - Vibrio parahaemolyticus Metabolism; Carbohydrate Metabolism}	NC_004605.1	1825524	1826936	VPA1706	VPA1706
IG2	57	Compatibility	uxuA	Accessory	mannonate dehydratase	{COG1312 D-mannonate dehydratase G Carbohydrate transport and metabolism ;}	{VPA1700 K01686 4.2.1.8 vpa00040 Pentose and glucuronate interconversions - Vibrio parahaemolyticus Metabolism; Carbohydrate Metabolism}	NC_004605.1	1818647	1819834	VPA1700	VPA1700
IG2	57	Compatibility	por	Accessory	Inner membrane protein YgjV	{NA}	{NA}	NC_004605.1	1828647	1829198	VPA1709	VPA1709
IG2	57	Compatibility	yiaM_1	Accessory	small integral C4-dicarboxylate membrane transport protein	{COG3090 TRAP-type C4-dicarboxylate transport system, small permease component G Carbohydrate transport and metabolism ;}	{NA}	NC_004605.1	1822162	1822683	VPA1703	VPA1703
IG2	57	Compatibility	kdgK_1	Accessory	dicarboxylate-binding periplasmic protein	{COG1638 TRAP-type C4-dicarboxylate transport system, periplasmic component G Carbohydrate transport and metabolism ;}	{NA}	NC_004605.1	1820863	1821846	VPA1702	VPA1702
IG3	54	Incompatibility	VP0368	Core	mannitol repressor protein	{COG3722 Transcriptional regulator K Transcription ;}	{NA}	NC_004603.1	368471	369001	VP0368	VP0368
IG3	54	Incompatibility	acoR_1	Accessory	DNA-binding transcriptional regulator DhaR	{NA}	{NA}	NC_004603.1	366397	368322	VP0367	VP0367
IG3	54	Incompatibility	dhaD	Accessory	glycerol dehydrogenase	{COG0371 Glycerol dehydrogenase and related enzymes C Energy production and conversion ;}	{VP0363 gldA K00005 1.1.1.6 vpa00561 Glycerolipid metabolism - Vibrio parahaemolyticus Metabolism; Lipid Metabolism}	NC_004603.1	360773	361855	VP0363	VP0363
IG3	54	Incompatibility	dhaK	Accessory	dihydroxyacetone kinase subunit DhaK	{COG2376 Dihydroxyacetone kinase G Carbohydrate transport and metabolism ;}	{VP0364 K05878 2.7.1.- vpa00561 Glycerolipid metabolism - Vibrio parahaemolyticus Metabolism; Lipid Metabolism}	NC_004603.1	362209	363267	VP0364	VP0364
IG3	54	Incompatibility	dhaL	Accessory	dihydroxyacetone kinase subunit DhaL	{COG2376 Dihydroxyacetone kinase G Carbohydrate transport and metabolism ;}	{VP0365 K05879 2.7.1.- vpa00561 Glycerolipid metabolism - Vibrio parahaemolyticus Metabolism; Lipid Metabolism}	NC_004603.1	363283	363918	VP0365	VP0365
IG3	54	Incompatibility	group_222	Accessory	phosphoenolpyruvate-protein phosphotransferase	{COG1080 Phosphoenolpyruvate-protein kinase (PTS system EI component in bacteria) G Carbohydrate transport and metabolism ;}	{NA}	NC_004603.1	364703	366319	VP0366	VP0366
IG3	54	Incompatibility	yniC	Accessory	Phosphorylated carbohydrates phosphatase	{NA}	{NA}	CP009765.1	2961394	2962053	FORC_006_02750
IG4	52	Compatibility	group_2440	Accessory	Glycosyl hydrolase family 92	{NA}	{NA}	CP009766.1	305239	307665	FORC_006_03448
IG4	52	Compatibility	group_657	Accessory	Glycosyl hydrolase family 92	{NA}	{NA}	CP009766.1	297315	299795	FORC_006_03445
IG4	52	Compatibility	group_949	Accessory	Glycosyl hydrolase family 92	{NA}	{NA}	CP009766.1	307792	310623	FORC_006_03449
IG4	52	Compatibility	group_989	Accessory	Glycosyl hydrolase family 92	{NA}	{NA}	CP009766.1	299885	302341	FORC_006_03446
IG5	49	Incompatibility	VPA0992	Core	hypothetical protein	{NA}	{NA}	NC_004605.1	1040997	1043624	VPA0992	VPA0992
IG5	49	Incompatibility	group_1163	Accessory	NPCBM-associated, NEW3 domain of alpha-galactosidase	{NA}	{NA}	CP003973.1	1012723	1015407	BB22OP_03947
IG5	49	Incompatibility	group_1406	Accessory	hypothetical protein	{NA}	{NA}	CP003973.1	1010372	1012618	BB22OP_03946
IG5	49	Incompatibility	group_2143	Accessory	NPCBM-associated, NEW3 domain of alpha-galactosidase	{NA}	{NA}	NC_004605.1	1043734	1046430	VPA0993	VPA0993
IG6	39	Compatibility	aldHT	Accessory	Aldehyde dehydrogenase, thermostable	{COG1012 NAD-dependent aldehyde dehydrogenases C Energy production and conversion ;}	{VIBHAR_05501 vha00903 Limonene and pinene degradation - Vibrio harveyi Metabolism; Biosynthesis of Secondary Metabolites}	CP011407.1	1312206	1313666	FORC_014_04260
IG6	39	Compatibility	betL_2	Accessory	Glycine betaine transporter BetL	{NA}	{NA}	CP011407.1	1310192	1311037	FORC_014_04258
IG6	39	Compatibility	gltC_3	Accessory	HTH-type transcriptional regulator GltC	{NA}	{NA}	CP011407.1	1314296	1315186	FORC_014_04262
IG6	39	Compatibility	group_10895	Accessory	hypothetical protein	{NA}	{NA}	CP011407.1	1305600	1305971	FORC_014_04253
IG6	39	Compatibility	group_11237	Accessory	Membrane dipeptidase (Peptidase family M19)	{COG2355 Zn-dependent dipeptidase, microsomal dipeptidase homolog E Amino acid transport and metabolism ;}	{NA}	CP011407.1	1311147	1312136	FORC_014_04259
IG6	39	Compatibility	group_4404	Accessory	hypothetical protein	{NA}	{NA}	CP011407.1	1306871	1307602	FORC_014_04255
IG6	39	Compatibility	group_5219	Accessory	hypothetical protein	{NA}	{NA}	CP011407.1	1307599	1309335	FORC_014_04256
IG6	39	Compatibility	group_5640	Accessory	Putative lipoprotein/NMB1162 precursor	{NA}	{NA}	CP011407.1	1305971	1306615	FORC_014_04254
IG6	39	Compatibility	group_6214	Accessory	Putative lipoprotein/NMB1164 precursor	{NA}	{NA}	CP011407.1	1305286	1305603	FORC_014_04252
IG6	39	Compatibility	group_7090	Accessory	hypothetical protein	{NA}	{NA}	CP011407.1	1304109	1304303	FORC_014_04250
IG6	39	Compatibility	group_7242	Accessory	Enamine/imine deaminase	{NA}	{NA}	CP011407.1	1313742	1314146	FORC_014_04261
IG7	38	Incompatibility	cytR_1	Accessory	LacI-family regulatory protein	{COG1609 Transcriptional regulators K Transcription ;}	{NA}	NC_004603.1	2513178	2514203	VP2396	VP2396
IG7	38	Incompatibility	group_2729	Accessory	DNA polymerase III PolC-type	{NA}	{NA}	CP014046.1	1606753	1607457	ATCC-17802_01496
IG7	38	Incompatibility	group_4355	Accessory	Sugar-binding cellulase-like protein	{NA}	{NA}	NC_004603.1	2511895	2512965	VP2395	VP2395
IG7	38	Incompatibility	kdsD_1	Accessory	Arabinose 5-phosphate isomerase KdsD	{NA}	{NA}	CP014046.1	1604910	1606751	ATCC-17802_01495
IG7	38	Incompatibility	sglT_3	Accessory	Sodium/glucose cotransporter	{NA}	{NA}	CP014046.1	1603215	1604846	ATCC-17802_01494
IG7	38	Incompatibility	yjmB	Accessory	sodium:galactoside symporter family protein	{COG2211 Na+/melibiose symporter and related transporters G Carbohydrate transport and metabolism ;}	{NA}	NC_004603.1	2510436	2511824	VP2394	VP2394
IG8	26	Compatibility	group_2582	Accessory	hypothetical protein	{NA}	{NA}	CP009848.1	653080	653313	FORC_004_03703
IG8	26	Compatibility	group_3814	Accessory	HTH-type transcriptional regulator YidZ	{NA}	{NA}	CP009848.1	649009	649953	FORC_004_03699
IG9	24	Incompatibility	group_361	Accessory	hypothetical protein	{NA}	{NA}	NC_004603.1	912790	914481	VP0880	VP0880
IG9	24	Incompatibility	group_4836	Accessory	hypothetical protein	{NA}	{NA}	CP003972.1	917922	918512	BB22OP_00869
IG10	23	Incompatibility	VP2000	Core	ribosomal-protein-alanine N-acetyltransferase	{NA}	{NA}	NC_004603.1	2095900	2096460	VP2000	VP2000
IG10	23	Incompatibility	group_1376	Accessory	hypothetical protein	{NA}	{NA}	NC_004603.1	2097690	2098364	VP2003	VP2003
IG10	23	Incompatibility	group_3579	Accessory	hypothetical protein	{NA}	{NA}	CP012950.1	1208256	1209068	FORC_023_01120
IG10	23	Incompatibility	group_5170	Accessory	hypothetical protein	{NA}	{NA}	CP012950.1	1209071	1209505	FORC_023_01121
IG10	23	Incompatibility	group_52	Accessory	ribosomal-protein-alanine N-acetyltransferase	{NA}	{NA}	NC_004603.1	2095934	2095934	VP2000	VP2000
IG10	23	Incompatibility	group_640	Accessory	acetyltransferase	{NA}	{NA}	NC_004603.1	2096464	2096955	VP2001	VP2001
IG10	23	Incompatibility	group_724	Accessory	Demethylmenaquinone methyltransferase	{NA}	{NA}	NC_004603.1	2096960	2097664	VP2002	VP2002
IG12	22	Incompatibility	group_11047	Accessory	Thiopurine S-methyltransferase	{NA}	{NA}	Scaffold2	84593	85189	E7_9_00209
IG12	22	Incompatibility	group_2240	Accessory	hypothetical protein	{NA}	{NA}	NC_004605.1	1208813	1209229	VPA1145	VPA1145
IG12	22	Incompatibility	group_2271	Accessory	Thiopurine S-methyltransferase	{COG0500 SAM-dependent methyltransferases QR Secondary metabolites biosynthesis, transport and catabolism ; General function prediction only ;}	{NA}	CP012951.1	575096	575698	FORC_023_03546
IG12	22	Incompatibility	group_5666	Accessory	hypothetical protein	{NA}	{NA}	CP013827.1	1193676	1194158	FORC_018_04119
IG12	22	Incompatibility	tpm_1	Accessory	Thiopurine S-methyltransferase	{NA}	{NA}	NC_004605.1	1209420	1210022	VPA1146	VPA1146
IG11	22	Compatibility	citB	Accessory	Aconitate hydratase	{COG1048 Aconitase A C Energy production and conversion ;}	{CbuK_0289 acnA K01681 4.2.1.3 cbc00720 Reductive carboxylate cycle (CO2 fixation) - Coxiella burnetii CbuK_Q154 Metabolism; Energy Metabolism}	Scaffold11	7606	10329	B9_8_02824
IG11	22	Compatibility	cspG_3	Accessory	Cold shock-like protein CspG	{COG1278 Cold shock proteins K Transcription ;}	{NA}	Scaffold11	10574	10786	B9_8_02825
IG11	22	Compatibility	group_6373	Accessory	Modulator of FtsH protease HflK	{COG0330 Membrane protease subunits, stomatin/prohibitin homologs O Posttranslational modification, protein turnover, chaperones ;}	{NA}	Scaffold11	4140	5198	B9_8_02821
IG11	22	Compatibility	hflC_1	Accessory	Modulator of FtsH protease HflC	{NA}	{NA}	Scaffold11	5195	6187	B9_8_02822
IG11	22	Compatibility	nhaA_2	Accessory	Na( )/H( ) antiporter NhaA	{NA}	{NA}	Scaffold11	6180	7523	B9_8_02823
IG14	20	Compatibility	group_1231	Accessory	hypothetical protein	{NA}	{NA}	CP013248.1	1706360	1707475	FORC_022_01583	VP1567
IG14	20	Compatibility	group_141	Accessory	hypothetical protein	{NA}	{NA}	CP013248.1	1710804	1711562	FORC_022_01592	VP1577
IG14	20	Compatibility	group_16178	Accessory	phage-like protein	{NA}	{NA}	NC_004605.1	945575	945838	VPA0910	VPA0910
IG14	20	Compatibility	group_1823	Accessory	hypothetical protein	{NA}	{NA}	CP013248.1	1712490	1712801	FORC_022_01595	VP1580
IG14	20	Compatibility	group_2245	Accessory	hypothetical protein	{NA}	{NA}	NC_004605.1	933864	934268	VPA0889	VPA0889
IG14	20	Compatibility	group_2398	Accessory	structural protein P5	{NA}	{NA}	CP013248.1	1705887	1706306	FORC_022_01582	VP1566
IG14	20	Compatibility	group_30	Accessory	hypothetical protein	{NA}	{NA}	CP013249.1	1069597	1070118	FORC_022_04115
IG14	20	Compatibility	group_3085	Accessory	hypothetical protein	{NA}	{NA}	CP013249.1	1066881	1067024	FORC_022_04108
IG14	20	Compatibility	group_3319	Accessory	phage-like protein	{NA}	{NA}	CP013248.1	1708192	1708686	FORC_022_01585	VP1569
IG14	20	Compatibility	group_37	Accessory	hypothetical protein	{NA}	{NA}	CP013248.1	1707479	1708195	FORC_022_01584	VP1568
IG14	20	Compatibility	group_403	Accessory	phage replication initiation protein	{NA}	{NA}	CP013248.1	1712805	1712960	FORC_022_01596	VP1583
IG14	20	Compatibility	group_515	Accessory	hypothetical protein	{NA}	{NA}	CP013248.1	1708687	1709073	FORC_022_01586	VP1571
IG14	20	Compatibility	group_57	Accessory	hypothetical protein	{NA}	{NA}	CP013248.1	1703252	1703683	FORC_022_01578	VP1563
IG14	20	Compatibility	group_580	Accessory	hypothetical protein	{NA}	{NA}	CP013248.1	1709404	1709715	FORC_022_01589	VP1574
IG14	20	Compatibility	group_6199	Accessory	hypothetical protein	{NA}	{NA}	CP013248.1	1709058	1709264	FORC_022_01587	VP1572
IG14	20	Compatibility	group_695	Accessory	hypothetical protein	{NA}	{NA}	CP013248.1	1715063	1715440	FORC_022_01599	VP1584
IG14	20	Compatibility	group_7315	Accessory	hypothetical protein	{NA}	{NA}	CP013249.1	1073393	1073656	FORC_022_04122
IG14	20	Compatibility	group_736	Accessory	hypothetical protein	{NA}	{NA}	CP013248.1	1713019	1714875	FORC_022_01597
IG14	20	Compatibility	group_783	Accessory	hypothetical protein	{NA}	{NA}	CP013249.1	1063266	1063493	FORC_022_04101
IG14	20	Compatibility	group_8443	Accessory	hypothetical protein	{NA}	{NA}	CP013248.1	1715771	1716037	FORC_022_01601	VP1586
IG14	20	Compatibility	group_8449	Accessory	hypothetical protein	{NA}	{NA}	CP013248.1	1710552	1710680	FORC_022_01591
IG14	20	Compatibility	group_893	Accessory	hypothetical protein	{NA}	{NA}	CP013248.1	1705481	1705666	FORC_022_01580	VP1565
IG14	20	Compatibility	group_9116	Accessory	hypothetical protein	{NA}	{NA}	Scaffold14	3938	4288	A3_4_03893
IG13	20	Incompatibility	group_1387	Accessory	hypothetical protein	{NA}	{NA}	NC_004603.1	1170232	1170945	VP1110	VP1110
IG13	20	Incompatibility	group_2087	Accessory	hypothetical protein	{NA}	{NA}	CP003972.1	1150544	1151275	BB22OP_01071
IG13	20	Incompatibility	group_508	Accessory	hypothetical protein	{NA}	{NA}	NC_004603.1	1169246	1170232	VP1109	VP1109
IG13	20	Incompatibility	group_594	Accessory	hypothetical protein	{NA}	{NA}	CP003972.1	1151275	1151709	BB22OP_01072
IG16	19	Incompatibility	araA	Accessory	L-arabinose isomerase	{COG2160 L-arabinose isomerase G Carbohydrate transport and metabolism ;}	{VPA1676 K01804 5.3.1.4 vpa00040 Pentose and glucuronate interconversions - Vibrio parahaemolyticus Metabolism; Carbohydrate Metabolism}	NC_004605.1	1797619	1799115	VPA1676	VPA1676
IG16	19	Incompatibility	araB	Accessory	ribulokinase	{COG1069 Ribulose kinase C Energy production and conversion ;}	{VPA1674 K00853 2.7.1.16 vpa00040 Pentose and glucuronate interconversions - Vibrio parahaemolyticus Metabolism; Carbohydrate Metabolism}	NC_004605.1	1795176	1796879	VPA1674	VPA1674
IG16	19	Incompatibility	araC	Accessory	DNA-binding transcriptional regulator AraC	{COG2207 AraC-type DNA-binding domain-containing proteins K Transcription ;}	{NA}	NC_004605.1	1799737	1800576	VPA1678	VPA1678
IG16	19	Incompatibility	araF	Accessory	L-arabinose-binding periplasmic protein	{COG1879 ABC-type sugar transport system, periplasmic component G Carbohydrate transport and metabolism ;}	{VPA1673 K10537 vpa02010 ABC transporters - Vibrio parahaemolyticus Environmental Information Processing; Membrane Transport}	NC_004605.1	1793803	1794804	VPA1673	VPA1673
IG16	19	Incompatibility	araG	Accessory	L-arabinose transporter ATP-binding protein	{COG1129 ABC-type sugar transport system, ATPase component G Carbohydrate transport and metabolism ;}	{VPA1672 araG K10539 3.6.3.17 vpa02010 ABC transporters - Vibrio parahaemolyticus Environmental Information Processing; Membrane Transport}	NC_004605.1	1792232	1793752	VPA1672	VPA1672
IG16	19	Incompatibility	galM_1	Accessory	Aldose 1-epimerase	{COG2017 Galactose mutarotase and related enzymes G Carbohydrate transport and metabolism ;}	{Ping_2506 galM K01785 5.1.3.3 pin00010 Glycolysis / Gluconeogenesis - Psychromonas ingrahamii Metabolism; Carbohydrate Metabolism}	CP009983.1	435904	436992	FORC_008_03448
IG16	19	Incompatibility	group_11235	Accessory	Extracellular exo-alpha-(1->5)-L-arabinofuranosidase precursor	{COG3940 Predicted beta-xylosidase R General function prediction only ;}	{NA}	CP009983.1	437049	437987	FORC_008_03449
IG16	19	Incompatibility	group_2738	Accessory	Glycosyl transferases group 1	{NA}	{NA}	CP009983.1	1704283	1705455	FORC_008_04566
IG16	19	Incompatibility	group_2907	Accessory	hypothetical protein	{COG0463 Glycosyltransferases involved in cell wall biogenesis M Cell wall/membrane/envelope biogenesis ;}	{NA}	CP009983.1	1703324	1704274	FORC_008_04565
IG16	19	Incompatibility	group_3331	Accessory	hypothetical protein	{NA}	{NA}	CP009983.1	1700584	1702233	FORC_008_04562
IG16	19	Incompatibility	group_4729	Accessory	hypothetical protein	{NA}	{NA}	NC_004605.1	1799162	1799680	VPA1677	VPA1677
IG16	19	Incompatibility	group_5158	Accessory	hypothetical protein	{NA}	{NA}	CP009983.1	1702230	1702946	FORC_008_04563
IG16	19	Incompatibility	group_5331	Accessory	L-arabinose isomerase	{COG2160 L-arabinose isomerase G Carbohydrate transport and metabolism ;}	{VPA1676 K01804 5.3.1.4 vpa00040 Pentose and glucuronate interconversions - Vibrio parahaemolyticus Metabolism; Carbohydrate Metabolism}	CP009983.1	432441	433943	FORC_008_03445
IG16	19	Incompatibility	group_5643	Accessory	GtrA-like protein	{NA}	{NA}	CP009983.1	1702960	1703337	FORC_008_04564
IG16	19	Incompatibility	group_7240	Accessory	Arabinose operon regulatory protein	{COG2207 AraC-type DNA-binding domain-containing proteins K Transcription ;}	{NA}	CP009983.1	435025	435861	FORC_008_03447
IG16	19	Incompatibility	group_9142	Accessory	Ribulokinase	{COG1069 Ribulose kinase C Energy production and conversion ;}	{VPA1674 K00853 2.7.1.16 vpa00040 Pentose and glucuronate interconversions - Vibrio parahaemolyticus Metabolism; Carbohydrate Metabolism}	CP009983.1	429982	431658	FORC_008_03443
IG16	19	Incompatibility	group_9143	Accessory	L-ribulose-5-phosphate 4-epimerase UlaF	{COG0235 Ribulose-5-phosphate 4-epimerase and related epimerases and aldolases G Carbohydrate transport and metabolism ;}	{SeHA_C4806 ulaF K03077 5.1.3.4 seh00053 Ascorbate and aldarate metabolism - Salmonella enterica subsp. enterica serovar Heidelberg Metabolism; Carbohydrate Metabolism}	CP009983.1	431661	432377	FORC_008_03444
IG16	19	Incompatibility	hypBA1	Accessory	Non-reducing end beta-L-arabinofuranosidase	{COG3533 Uncharacterized protein conserved in bacteria S Function unknown ;}	{NA}	CP009983.1	426195	428189	FORC_008_03441
IG16	19	Incompatibility	rbsC_1	Accessory	L-arabinose transporter permease	{COG1172 Ribose/xylose/arabinose/galactoside ABC-type transport systems, permease components G Carbohydrate transport and metabolism ;}	{VPA1671 araH K10538 vpa02010 ABC transporters - Vibrio parahaemolyticus Environmental Information Processing; Membrane Transport}	NC_004605.1	1791228	1792217	VPA1671	VPA1671
IG16	19	Incompatibility	ulaF	Accessory	L-ribulose-5-phosphate 4-epimerase	{COG0235 Ribulose-5-phosphate 4-epimerase and related epimerases and aldolases G Carbohydrate transport and metabolism ;}	{NA}	NC_004605.1	1796872	1797612	VPA1675	VPA1675
IG16	19	Incompatibility	ybhA	Accessory	Pyridoxal phosphate phosphatase YbhA	{COG0561 Predicted hydrolases of the HAD superfamily R General function prediction only ;}	{NA}	CP009983.1	434140	434964	FORC_008_03446
IG16	19	Incompatibility	yicJ_1	Accessory	Inner membrane symporter YicJ	{COG2211 Na+/melibiose symporter and related transporters G Carbohydrate transport and metabolism ;}	{NA}	CP009983.1	437998	439392	FORC_008_03450
IG16	19	Incompatibility	yicJ_2	Accessory	Inner membrane symporter YicJ	{COG2211 Na+/melibiose symporter and related transporters G Carbohydrate transport and metabolism ;}	{NA}	CP009983.1	428189	429571	FORC_008_03442
IG15	19	Compatibility	group_10811	Accessory	Prophage CP4-57 regulatory protein (AlpA)	{NA}	{NA}	LFUO01000010.1	996639	996878	PMC14.7_02037
IG15	19	Compatibility	group_4744	Accessory	hypothetical protein	{NA}	{NA}	LFUO01000010.1	997102	997671	PMC14.7_02038
IG15	19	Compatibility	group_5126	Accessory	hypothetical protein	{NA}	{NA}	LFUO01000010.1	995797	996642	PMC14.7_02036
IG15	19	Compatibility	intA_2	Accessory	Prophage CP4-57 integrase	{COG0582 Integrase L Replication, recombination and repair ;}	{NA}	LFUO01000010.1	992379	993584	PMC14.7_02034
IG15	19	Compatibility	virF_2	Accessory	Virulence regulon transcriptional activator VirF	{NA}	{NA}	LFUO01000010.1	995046	995660	PMC14.7_02035
IG17	18	Compatibility	group_10440	Accessory	hypothetical protein	{NA}	{NA}	CP014046.1	611107	612171	ATCC-17802_00588
IG17	18	Compatibility	group_5668	Accessory	Putative prophage CPS-53 integrase	{NA}	{NA}	CP014046.1	606530	607024	ATCC-17802_00584
IG19	17	Incompatibility	group_7300	Accessory	Porin-like protein L precursor	{NA}	{NA}	CP003973.1	159281	160261	BB22OP_03189
IG19	17	Incompatibility	ompD	Accessory	outer membrane protein	{NA}	{NA}	NC_004605.1	159295	160344	VPA0166	VPA0166
IG18	17	Compatibility	algE7_1	Accessory	biofilm-associated surface protein	{NA}	{NA}	MIVA01000041.1	1697	7786	CDC_K5528_00787	VPA0953
IG18	17	Compatibility	bepC_3	Accessory	agglutination protein	{COG1538 Outer membrane protein MU Cell wall/membrane/envelope biogenesis ; Intracellular trafficking, secretion, and vesicular transport ;}	{NA}	MIVA01000041.1	8154	9467	CDC_K5528_00788	VPA0954
IG18	17	Compatibility	group_10882	Accessory	outer membrane protein	{COG2885 Outer membrane protein and related peptidoglycan-associated (lipo)proteins M Cell wall/membrane/envelope biogenesis ;}	{NA}	MIVA01000041.1	9473	10090	CDC_K5528_00789	VPA0955
IG18	17	Compatibility	group_5153	Accessory	Transposase	{NA}	{NA}	MIVA01000041.1	670	1389	CDC_K5528_00786
IG18	17	Compatibility	sgrR_4	Accessory	transporter binding protein	{NA}	{NA}	MIVA01000041.1	10419	12074	CDC_K5528_00790	VPA0957
IG24	16	Incompatibility	group_2404	Accessory	hypothetical protein	{NA}	{NA}	CP003973.1	814294	814740	BB22OP_03777
IG24	16	Incompatibility	ltaA	Accessory	L-allo-threonine aldolase	{NA}	{NA}	NC_004605.1	823684	824760	VPA0796	VPA0796
IG23	16	Compatibility	engB_2	Accessory	GTP-binding protein EngB	{COG3596 Predicted GTPase R General function prediction only ;}	{NA}	NC_021848.1	3084055	3085044	CDC_K4557_02837
IG23	16	Compatibility	group_1694	Accessory	Prophage CP4-57 integrase	{NA}	{NA}	NC_021848.1	3067178	3068446	CDC_K4557_02821
IG23	16	Compatibility	group_2913	Accessory	hypothetical protein	{NA}	{NA}	NC_021848.1	3080950	3081399	CDC_K4557_02831
IG23	16	Compatibility	group_3097	Accessory	Prophage CP4-57 regulatory protein (AlpA)	{COG3311 Predicted transcriptional regulator K Transcription ;}	{NA}	NC_021848.1	3083756	3083977	CDC_K4557_02836
IG23	16	Compatibility	group_3837	Accessory	hypothetical protein	{NA}	{NA}	NC_021848.1	3081438	3081869	CDC_K4557_02832
IG23	16	Compatibility	group_4118	Accessory	hypothetical protein	{NA}	{NA}	NC_021848.1	3082355	3082606	CDC_K4557_02834
IG23	16	Compatibility	group_4119	Accessory	hypothetical protein	{NA}	{NA}	NC_021848.1	3085155	3085601	CDC_K4557_02838
IG23	16	Compatibility	group_4797	Accessory	hypothetical protein	{COG3339 Uncharacterized conserved protein S Function unknown ;}	{NA}	NC_021848.1	3081877	3082215	CDC_K4557_02833
IG23	16	Compatibility	group_4798	Accessory	hypothetical protein	{NA}	{NA}	NC_021848.1	3082767	3083759	CDC_K4557_02835
IG23	16	Compatibility	group_7182	Accessory	hypothetical protein	{COG2003 DNA repair proteins L Replication, recombination and repair ;}	{NA}	NC_021848.1	3080486	3080953	CDC_K4557_02830
IG22	16	Compatibility	group_10621	Accessory	AAA-like domain protein	{NA}	{NA}	CP009765.1	2402267	2407408	FORC_006_02252
IG22	16	Compatibility	group_11894	Accessory	hypothetical protein	{NA}	{NA}	CP009765.1	2410650	2411507	FORC_006_02255
IG22	16	Compatibility	group_11895	Accessory	hypothetical protein	{NA}	{NA}	CP009765.1	2411547	2411852	FORC_006_02256
IG22	16	Compatibility	group_18640	Accessory	hypothetical protein	{NA}	{NA}	CP009765.1	2407389	2408729	FORC_006_02253
IG22	16	Compatibility	group_2109	Accessory	hypothetical protein	{NA}	{NA}	CP009765.1	2397123	2397470	FORC_006_02246
IG22	16	Compatibility	group_3144	Accessory	hypothetical protein	{NA}	{NA}	CP009765.1	2390152	2392179	FORC_006_02242
IG22	16	Compatibility	group_4161	Accessory	chromosome segregation protein	{NA}	{NA}	CP009765.1	2395114	2397123	FORC_006_02245
IG22	16	Compatibility	group_5278	Accessory	hypothetical protein	{NA}	{NA}	CP009765.1	2393474	2395105	FORC_006_02244
IG22	16	Compatibility	group_7506	Accessory	hypothetical protein	{NA}	{NA}	CP009765.1	2408731	2410329	FORC_006_02254
IG22	16	Compatibility	group_8930	Accessory	hypothetical protein	{NA}	{NA}	CP009765.1	2392398	2393477	FORC_006_02243
IG21	16	Compatibility	fdtB	Accessory	dTDP-3-amino-3,6-dideoxy-alpha-D-galactopyranose transaminase	{COG2030 Acyl dehydratase I Lipid transport and metabolism ;}	{NA}	NC_021848.1	2691721	2692818	CDC_K4557_02470
IG21	16	Compatibility	group_16495	Accessory	TDP-4-oxo-6-deoxy-alpha-D-glucose-3,4-oxoisomerase	{NA}	{NA}	NC_021848.1	2693944	2694372	CDC_K4557_02473
IG21	16	Compatibility	group_7134	Accessory	Glycosyltransferase family 25 (LPS biosynthesis protein)	{NA}	{NA}	NC_021848.1	2688230	2688958	CDC_K4557_02466
IG21	16	Compatibility	lacA_2	Accessory	Galactoside O-acetyltransferase	{NA}	{NA}	NC_021848.1	2690111	2690716	CDC_K4557_02468
IG21	16	Compatibility	lpxA_2	Accessory	Acyl-[acyl-carrier-protein]--UDP-N-acetylglucosamine O-acyltransferase	{NA}	{NA}	NC_021848.1	2693223	2693975	CDC_K4557_02472
IG21	16	Compatibility	pglJ	Accessory	N-acetylgalactosamine-N,N'-diacetylbacillosaminyl-diphospho-undecaprenol 4-alpha-N-acetylgalactosaminyltransferase	{NA}	{NA}	NC_021848.1	2689011	2690114	CDC_K4557_02467
IG20	16	Incompatibility	VPA1644	Core	maltoporin	{COG4580 Maltoporin (phage lambda and maltose receptor) G Carbohydrate transport and metabolism ;}	{NA}	NC_004605.1	1753012	1754310	VPA1644	VPA1644
IG20	16	Incompatibility	group_10906	Accessory	maltose regulon periplasmic protein	{NA}	{NA}	CP006005.1	329991	330821	FDA_R31_03431
IG20	16	Incompatibility	group_10907	Accessory	Maltoporin precursor	{COG4580 Maltoporin (phage lambda and maltose receptor) G Carbohydrate transport and metabolism ;}	{NA}	CP006005.1	330979	332187	FDA_R31_03432
IG20	16	Incompatibility	group_3950	Accessory	maltose operon periplasmic protein	{NA}	{NA}	NC_004605.1	1752102	1752911	VPA1643	VPA1643
IG20	16	Incompatibility	group_7099	Accessory	hypothetical protein	{NA}	{NA}	CP006005.1	328015	328533	FDA_R31_03428
IG20	16	Incompatibility	lamB	Accessory	Maltoporin precursor	{COG4580 Maltoporin (phage lambda and maltose receptor) G Carbohydrate transport and metabolism ;}	{NA}	CP012951.1	1638676	1639947	FORC_023_04464
IG31	15	Compatibility	group_13693	Accessory	hypothetical protein	{NA}	{NA}	NC_004603.1	668498	669238	VP0637	VP0637
IG31	15	Compatibility	xerC_3	Accessory	Phage integrase family protein	{NA}	{NA}	NC_004603.1	672556	674355	VP0643	VP0643
IG30	15	Incompatibility	group_1063	Accessory	hypothetical protein	{NA}	{NA}	CP014046.1	1062370	1062813	ATCC-17802_00985
IG30	15	Incompatibility	group_1461	Accessory	MshP protein	{NA}	{NA}	NC_004603.1	2849701	2850135	VP2693	VP2693
IG30	15	Incompatibility	group_1785	Accessory	hypothetical protein	{NA}	{NA}	CP014046.1	1063408	1064121	ATCC-17802_00987
IG30	15	Incompatibility	group_2736	Accessory	MSHA pilin protein MshC	{NA}	{NA}	NC_004603.1	2851402	2851887	VP2696	VP2696
IG30	15	Incompatibility	group_2930	Accessory	hypothetical protein	{NA}	{NA}	Scaffold2	61609	62781	E2_2_00182
IG30	15	Incompatibility	group_3043	Accessory	hypothetical protein	{NA}	{NA}	CP014046.1	1062810	1063385	ATCC-17802_00986
IG30	15	Incompatibility	group_3634	Accessory	hypothetical protein	{NA}	{NA}	CP014046.1	1064550	1069067	ATCC-17802_00989
IG30	15	Incompatibility	group_3805	Accessory	MSHA pilin protein MshD	{NA}	{NA}	NC_004603.1	2850839	2851387	VP2695	VP2695
IG30	15	Incompatibility	group_4399	Accessory	type IV prepilin%2C MshO	{NA}	{NA}	NC_004603.1	2850125	2850838	VP2694	VP2694
IG30	15	Incompatibility	group_5748	Accessory	hypothetical protein	{NA}	{NA}	Scaffold2	62781	63344	E2_2_00183
IG30	15	Incompatibility	group_5834	Accessory	hypothetical protein	{NA}	{NA}	CP014046.1	1064069	1064545	ATCC-17802_00988
IG30	15	Incompatibility	group_6342	Accessory	hypothetical protein	{NA}	{NA}	Scaffold2	63341	63802	E2_2_00184
IG29	15	Compatibility	arnA	Accessory	Bifunctional polymyxin resistance protein ArnA	{NA}	{NA}	CP009982.1	3029639	3030514	FORC_008_02796
IG29	15	Compatibility	fabG_8	Accessory	3-oxoacyl-[acyl-carrier-protein] reductase FabG	{NA}	{NA}	CP009982.1	3030507	3031247	FORC_008_02797
IG29	15	Compatibility	fabH_1	Accessory	3-oxoacyl-[acyl-carrier-protein] synthase 3	{NA}	{NA}	CP009982.1	3031469	3032536	FORC_008_02799
IG29	15	Compatibility	group_11451	Accessory	Putative acetyltransferase EpsM	{NA}	{NA}	CP009982.1	3029003	3029635	FORC_008_02795
IG29	15	Compatibility	group_11452	Accessory	Glycosyltransferase family 25 (LPS biosynthesis protein)	{NA}	{NA}	CP009982.1	3026498	3027220	FORC_008_02792
IG29	15	Compatibility	group_17518	Accessory	Phosphopantetheine attachment site	{NA}	{NA}	CP009982.1	3031253	3031468	FORC_008_02798
IG29	15	Compatibility	group_6386	Accessory	Glycosyl transferase family 2	{NA}	{NA}	CP009982.1	3028108	3028956	FORC_008_02794
IG29	15	Compatibility	group_8833	Accessory	D-alanine--poly(phosphoribitol) ligase subunit 2	{NA}	{NA}	CP009982.1	3032540	3032767	FORC_008_02800
IG29	15	Compatibility	pssM	Accessory	Exopolysaccharide glucosyl ketal-pyruvate-transferase	{NA}	{NA}	CP009982.1	3027260	3028102	FORC_008_02793
IG29	15	Compatibility	tycC	Accessory	Tyrocidine synthase 3	{NA}	{NA}	CP009982.1	3032772	3034307	FORC_008_02801
IG29	15	Compatibility	vioA	Accessory	dTDP-4-amino-4,6-dideoxy-D-glucose transaminase	{COG0399 Predicted pyridoxal phosphate-dependent enzyme apparently involved in regulation of cell wall biogenesis M Cell wall/membrane/envelope biogenesis ;}	{Abu_1815 abu00903 Limonene and pinene degradation - Arcobacter butzleri Metabolism; Biosynthesis of Secondary Metabolites}	CP009982.1	3034332	3035420	FORC_008_02802
IG28	15	Compatibility	group_1192	Accessory	hypothetical protein	{NA}	{NA}	JWSS01000001.1	516961	517344	10329_00507
IG28	15	Compatibility	group_1525	Accessory	Helix-turn-helix domain protein	{NA}	{NA}	JWSS01000001.1	533202	533537	10329_00524
IG28	15	Compatibility	group_1861	Accessory	hypothetical protein	{NA}	{NA}	JWSS01000001.1	517900	518598	10329_00509
IG28	15	Compatibility	group_2475	Accessory	hypothetical protein	{NA}	{NA}	JWSS01000001.1	517555	517764	10329_00508
IG28	15	Compatibility	group_3431	Accessory	Prophage CP4-57 regulatory protein (AlpA)	{NA}	{NA}	JWSS01000001.1	531265	531456	10329_00522
IG28	15	Compatibility	group_627	Accessory	hypothetical protein	{NA}	{NA}	JWSS01000001.1	515901	516758	10329_00506
IG28	15	Compatibility	group_710	Accessory	site-specific tyrosine recombinase XerC	{NA}	{NA}	JWSS01000001.1	533558	534685	10329_00525
IG28	15	Compatibility	group_758	Accessory	hypothetical protein	{NA}	{NA}	JWSS01000001.1	531469	533142	10329_00523
IG28	15	Compatibility	group_859	Accessory	hypothetical protein	{NA}	{NA}	JWSS01000001.1	519208	519786	10329_00511
IG27	15	Compatibility	group_2274	Accessory	hypothetical protein	{NA}	{NA}	Scaffold1	236119	236712	C5_3_00215
IG27	15	Compatibility	group_3370	Accessory	hypothetical protein	{NA}	{NA}	Scaffold1	228346	228774	C5_3_00209
IG27	15	Compatibility	group_3371	Accessory	hypothetical protein	{NA}	{NA}	Scaffold1	236754	237233	C5_3_00216
IG27	15	Compatibility	group_4852	Accessory	hypothetical protein	{NA}	{NA}	Scaffold1	234524	236107	C5_3_00214
IG27	15	Compatibility	group_7349	Accessory	hypothetical protein	{NA}	{NA}	Scaffold1	233605	234519	C5_3_00213
IG27	15	Compatibility	group_7515	Accessory	Transposon Tn7 transposition protein TnsB	{NA}	{NA}	Scaffold1	230051	232228	C5_3_00211
IG27	15	Compatibility	tnsA	Accessory	Transposon Tn7 transposition protein TnsA	{NA}	{NA}	Scaffold1	229198	230061	C5_3_00210
IG27	15	Compatibility	tnsC	Accessory	Transposon Tn7 transposition protein TnsC	{NA}	{NA}	Scaffold1	232206	233612	C5_3_00212
IG26	15	Compatibility	group_1025	Accessory	hypothetical protein	{NA}	{NA}	CP003972.1	195947	196174	BB22OP_00181
IG26	15	Compatibility	group_1455	Accessory	hypothetical protein	{COG2003 DNA repair proteins L Replication, recombination and repair ;}	{NA}	CP003972.1	198603	199076	BB22OP_00186
IG26	15	Compatibility	group_2851	Accessory	Prophage CP4-57 regulatory protein (AlpA)	{COG3311 Predicted transcriptional regulator K Transcription ;}	{NA}	CP003972.1	193582	193782	BB22OP_00177
IG26	15	Compatibility	group_384	Accessory	hypothetical protein	{NA}	{NA}	CP003972.1	192187	192861	BB22OP_00175
IG26	15	Compatibility	group_443	Accessory	hypothetical protein	{NA}	{NA}	CP003972.1	197674	198117	BB22OP_00184
IG26	15	Compatibility	group_444	Accessory	hypothetical protein	{NA}	{NA}	CP003972.1	198169	198606	BB22OP_00185
IG26	15	Compatibility	group_534	Accessory	hypothetical protein	{NA}	{NA}	CP003972.1	196621	197355	BB22OP_00183
IG26	15	Compatibility	group_722	Accessory	hypothetical protein	{NA}	{NA}	CP003972.1	196222	196590	BB22OP_00182
IG25	15	Compatibility	group_5663	Accessory	Tellurite resistance protein TerB	{NA}	{NA}	Scaffold2	424187	426469	E1_9_01155
IG25	15	Compatibility	group_7143	Accessory	hypothetical protein	{NA}	{NA}	Scaffold2	422876	424183	E1_9_01154
IG25	15	Compatibility	group_7869	Accessory	hypothetical protein	{NA}	{NA}	Scaffold2	426626	426967	E1_9_01156
IG25	15	Compatibility	recQ_3	Accessory	ATP-dependent DNA helicase RecQ	{NA}	{NA}	Scaffold2	420690	422879	E1_9_01153
IG37	14	Incompatibility	group_1427	Accessory	hypothetical protein	{NA}	{NA}	JWSS01000001.1	1985394	1985579	10329_01886	VP1707
IG37	14	Incompatibility	group_2574	Accessory	hypothetical protein	{NA}	{NA}	CP003972.1	1765324	1766178	BB22OP_01599
IG37	14	Incompatibility	group_4755	Accessory	hypothetical protein	{NA}	{NA}	CP003972.1	1764800	1765327	BB22OP_01598
IG36	14	Compatibility	group_1612	Accessory	hypothetical protein	{NA}	{NA}	CP014046.1	1129866	1129991	ATCC-17802_01048
IG36	14	Compatibility	group_176	Accessory	hypothetical protein	{NA}	{NA}	CP014046.1	1128247	1128747	ATCC-17802_01046
IG36	14	Compatibility	group_2142	Accessory	Ribonuclease H	{NA}	{NA}	S090_5873	9408	10076	S090_00251
IG36	14	Compatibility	group_259	Accessory	hypothetical protein	{NA}	{NA}	CP014046.1	1127816	1128202	ATCC-17802_01045
IG36	14	Compatibility	group_2953	Accessory	hypothetical protein	{NA}	{NA}	CP009847.1	2848506	2848628	FORC_004_02634
IG36	14	Compatibility	group_2966	Accessory	hypothetical protein	{NA}	{NA}	CP014046.1	1131831	1132028	ATCC-17802_01051
IG36	14	Compatibility	group_3408	Accessory	hypothetical protein	{NA}	{NA}	S090_5873	6049	6477	S090_00249
IG36	14	Compatibility	group_374	Accessory	hypothetical protein	{NA}	{NA}	CP014046.1	1139406	1140101	ATCC-17802_01058
IG36	14	Compatibility	group_3920	Accessory	hypothetical protein	{NA}	{NA}	S090_5873	2876	4144	S090_00246
IG36	14	Compatibility	group_4504	Accessory	hypothetical protein	{NA}	{NA}	CP014046.1	1131608	1131745	ATCC-17802_01050
IG36	14	Compatibility	group_556	Accessory	hypothetical protein	{NA}	{NA}	CP014046.1	1130387	1131187	ATCC-17802_01049
IG36	14	Compatibility	group_624	Accessory	Putative prophage CPS-53 integrase	{NA}	{NA}	CP014046.1	1126477	1127712	ATCC-17802_01044
IG36	14	Compatibility	group_671	Accessory	hypothetical protein	{NA}	{NA}	S090_5873	6544	9237	S090_00250
IG36	14	Compatibility	group_707	Accessory	hypothetical protein	{NA}	{NA}	CP014046.1	1128848	1129279	ATCC-17802_01047
IG36	14	Compatibility	group_9197	Accessory	Helix-turn-helix domain protein	{NA}	{NA}	S090_5873	5496	5675	S090_00248
IG36	14	Compatibility	xerC_2	Accessory	Tyrosine recombinase XerC	{NA}	{NA}	S090_5873	4328	5485	S090_00247
IG35	14	Compatibility	VP0249	Core	ATP-dependent protease ATP-binding subunit HslU	{COG1220 ATP-dependent protease HslVU (ClpYQ), ATPase subunit O Posttranslational modification, protein turnover, chaperones ;}	{NA}	NC_004603.1	260134	261465	VP0249	VP0249
IG35	14	Compatibility	adhB_2	Accessory	Alcohol dehydrogenase 2	{COG1454 Alcohol dehydrogenase, class IV C Energy production and conversion ;}	{NA}	CP013249.1	770264	771409	FORC_022_03855
IG35	14	Compatibility	araB_2	Accessory	L-arabinolactonase	{COG3386 Gluconolactonase G Carbohydrate transport and metabolism ;}	{NA}	Scaffold31	7352	8227	C1_8_04682
IG35	14	Compatibility	atsA_5	Accessory	Arylsulfatase	{COG3119 Arylsulfatase A and related enzymes P Inorganic ion transport and metabolism ;}	{NA}	CP013249.1	729005	731389	FORC_022_03816
IG35	14	Compatibility	btr_2	Accessory	HTH-type transcriptional activator Btr	{NA}	{NA}	CP013249.1	813943	814755	FORC_022_03894
IG35	14	Compatibility	cas3	Accessory	CRISPR-associated endonuclease Cas1	{COG1518 Uncharacterized protein predicted to be involved in DNA repair L Replication, recombination and repair ;}	{NA}	CP013249.1	818230	819207	FORC_022_03898
IG35	14	Compatibility	cas6f	Accessory	CRISPR-associated endonuclease Cas6/Csy4	{NA}	{NA}	CP013249.1	825798	826436	FORC_022_03903
IG35	14	Compatibility	chuR_4	Accessory	Anaerobic sulfatase-maturating enzyme	{COG0641 Arylsulfatase regulator (Fe-S oxidoreductase) R General function prediction only ;}	{NA}	CP013249.1	731399	732670	FORC_022_03817
IG35	14	Compatibility	chuR_5	Accessory	Anaerobic sulfatase-maturating enzyme	{COG0641 Arylsulfatase regulator (Fe-S oxidoreductase) R General function prediction only ;}	{NA}	CP013249.1	804267	805418	FORC_022_03885
IG35	14	Compatibility	citA	Accessory	Sensor histidine kinase CitA	{COG3290 Signal transduction histidine kinase regulating citrate/malate metabolism T Signal transduction mechanisms ;}	{PBPRA2300 K07700 2.7.13.3 ppr02020 Two-component system - Photobacterium profundum Environmental Information Processing; Signal Transduction}	NC_021822.1	611993	613648	CDC_K4557_03611
IG35	14	Compatibility	citC	Accessory	[Citrate [pro-3S]-lyase] ligase	{COG3053 Citrate lyase synthetase C Energy production and conversion ;}	{PBPRA2295 K01910 6.2.1.22 ppr02020 Two-component system - Photobacterium profundum Environmental Information Processing; Signal Transduction}	NC_021822.1	618835	619887	CDC_K4557_03616
IG35	14	Compatibility	citD	Accessory	Citrate lyase acyl carrier protein	{COG3052 Citrate lyase, gamma subunit C Energy production and conversion ;}	{VC0797 K01646 4.1.3.6 vch02020 Two-component system - Vibrio cholerae O1 Environmental Information Processing; Signal Transduction}	NC_021822.1	619929	620225	CDC_K4557_03617
IG35	14	Compatibility	citE	Accessory	Citrate lyase subunit beta	{COG2301 Citrate lyase beta subunit G Carbohydrate transport and metabolism ;}	{PBPRA2293 K01644 4.1.3.6 ppr02020 Two-component system - Photobacterium profundum Environmental Information Processing; Signal Transduction}	NC_021822.1	620222	621097	CDC_K4557_03618
IG35	14	Compatibility	citF	Accessory	Citrate lyase alpha chain	{COG3051 Citrate lyase, alpha subunit C Energy production and conversion ;}	{PBPRA2292 K01643 4.1.3.6 ppr02020 Two-component system - Photobacterium profundum Environmental Information Processing; Signal Transduction}	NC_021822.1	621107	622624	CDC_K4557_03619
IG35	14	Compatibility	citG	Accessory	2-(5''-triphosphoribosyl)-3'-dephosphocoenzyme-A synthase	{COG1767 Triphosphoribosyl-dephospho-CoA synthetase H Coenzyme transport and metabolism ;}	{PBPRA2290 K05966 2.7.8.25 ppr02020 Two-component system - Photobacterium profundum Environmental Information Processing; Signal Transduction}	NC_021822.1	623138	624097	CDC_K4557_03621
IG35	14	Compatibility	citS	Accessory	Citrate-sodium symporter	{COG3493 Na+/citrate symporter C Energy production and conversion ;}	{NA}	NC_021822.1	617221	618567	CDC_K4557_03615
IG35	14	Compatibility	citX	Accessory	Apo-citrate lyase phosphoribosyl-dephospho-CoA transferase	{COG3697 Phosphoribosyl-dephospho-CoA transferase (holo-ACP synthetase) HI Coenzyme transport and metabolism ; Lipid transport and metabolism ;}	{PBPRA2291 K05964 2.7.7.61 ppr02020 Two-component system - Photobacterium profundum Environmental Information Processing; Signal Transduction}	NC_021822.1	622621	623157	CDC_K4557_03620
IG35	14	Compatibility	csy1	Accessory	CRISPR-associated protein Csy1	{NA}	{NA}	CP013249.1	822584	823855	FORC_022_03900
IG35	14	Compatibility	csy2	Accessory	CRISPR-associated protein Csy2	{NA}	{NA}	CP013249.1	823852	824745	FORC_022_03901
IG35	14	Compatibility	dpiA_2	Accessory	Transcriptional regulatory protein DpiA	{COG4565 Response regulator of citrate/malate metabolism KT Transcription ; Signal transduction mechanisms ;}	{PBPRA2301 K07702 ppr02020 Two-component system - Photobacterium profundum Environmental Information Processing; Signal Transduction}	NC_021822.1	611326	612006	CDC_K4557_03610
IG35	14	Compatibility	eda_4	Accessory	Putative KHG/KDPG aldolase	{COG0800 2-keto-3-deoxy-6-phosphogluconate aldolase G Carbohydrate transport and metabolism ;}	{plu0178 eda K01625 4.1.3.16 4.1.2.14 plu00630 Glyoxylate and dicarboxylate metabolism - Photorhabdus luminescens Metabolism; Carbohydrate Metabolism}	CP013249.1	812647	813288	FORC_022_03892
IG35	14	Compatibility	fabG3	Accessory	3-alpha-(or 20-beta)-hydroxysteroid dehydrogenase	{NA}	{NA}	Scaffold31	9154	9921	C1_8_04684
IG35	14	Compatibility	galM_2	Accessory	Aldose 1-epimerase	{NA}	{NA}	CP013249.1	838643	839545	FORC_022_03910
IG35	14	Compatibility	galM_3	Accessory	Aldose 1-epimerase	{NA}	{NA}	Scaffold31	6463	7359	C1_8_04681
IG35	14	Compatibility	garR_2	Accessory	2-hydroxy-3-oxopropionate reductase	{NA}	{NA}	Scaffold31	8229	9098	C1_8_04683
IG35	14	Compatibility	gntR_3	Accessory	HTH-type transcriptional regulator GntR	{NA}	{NA}	Scaffold31	962	1993	C1_8_04677
IG35	14	Compatibility	group_10164	Accessory	putative type I restriction enzymeP M protein	{COG0286 Type I restriction-modification system methyltransferase subunit V Defense mechanisms ;}	{NA}	Scaffold27	8655	10280	C1_8_04625
IG35	14	Compatibility	group_1023	Accessory	HTH-type transcriptional regulator LeuO	{NA}	{NA}	CP013249.1	728044	728898	FORC_022_03815
IG35	14	Compatibility	group_11122	Accessory	hypothetical protein	{NA}	{NA}	NC_021822.1	627763	628242	CDC_K4557_03625
IG35	14	Compatibility	group_11123	Accessory	DNA-binding transcriptional activator CadC	{NA}	{NA}	NC_021822.1	628224	628853	CDC_K4557_03626
IG35	14	Compatibility	group_11202	Accessory	hypothetical protein	{NA}	{NA}	NC_021822.1	624116	624943	CDC_K4557_03622
IG35	14	Compatibility	group_11206	Accessory	hypothetical protein	{NA}	{NA}	NC_021822.1	610975	611244	CDC_K4557_03609
IG35	14	Compatibility	group_11868	Accessory	Helix-turn-helix	{NA}	{NA}	Scaffold1	312188	312394	F8_2_00272
IG35	14	Compatibility	group_11869	Accessory	hypothetical protein	{NA}	{NA}	CP013249.1	763960	764436	FORC_022_03847
IG35	14	Compatibility	group_11870	Accessory	Pectate lyase superfamily protein	{NA}	{NA}	CP013249.1	803085	804251	FORC_022_03884
IG35	14	Compatibility	group_11991	Accessory	hypothetical protein	{NA}	{NA}	CP013249.1	785280	786104	FORC_022_03864
IG35	14	Compatibility	group_11992	Accessory	hypothetical protein	{NA}	{NA}	CP013249.1	787471	787947	FORC_022_03866
IG35	14	Compatibility	group_11993	Accessory	CobQ/CobB/MinD/ParA nucleotide binding domain protein	{NA}	{NA}	CP013249.1	787950	789191	FORC_022_03867
IG35	14	Compatibility	group_11994	Accessory	Bacterial type II secretion system protein F domain protein	{NA}	{NA}	CP013249.1	791360	792208	FORC_022_03870
IG35	14	Compatibility	group_11995	Accessory	hypothetical protein	{NA}	{NA}	CP013249.1	793406	793966	FORC_022_03873
IG35	14	Compatibility	group_1236	Accessory	hypothetical protein	{NA}	{NA}	CP013249.1	751784	752260	FORC_022_03837
IG35	14	Compatibility	group_13733	Accessory	hypothetical protein	{NA}	{NA}	CP013249.1	792937	793419	FORC_022_03872
IG35	14	Compatibility	group_13742	Accessory	putative lipoprotein YiaD precursor	{NA}	{NA}	CP013249.1	795527	796192	FORC_022_03875
IG35	14	Compatibility	group_1688	Accessory	hypothetical protein	{NA}	{NA}	NC_021848.1	2648313	2648969	CDC_K4557_02429
IG35	14	Compatibility	group_1831	Accessory	Phage-related baseplate assembly protein	{NA}	{NA}	Scaffold57	390	986	C1_8_04781
IG35	14	Compatibility	group_18586	Accessory	hypothetical protein	{NA}	{NA}	CP013249.1	763400	763945	FORC_022_03846
IG35	14	Compatibility	group_18588	Accessory	putative symporter YidK	{NA}	{NA}	CP013249.1	808242	809999	FORC_022_03888
IG35	14	Compatibility	group_1859	Accessory	hypothetical protein	{NA}	{NA}	CP013249.1	844924	845976	FORC_022_03914
IG35	14	Compatibility	group_18592	Accessory	Arylsulfatase	{NA}	{NA}	CP013249.1	814892	816463	FORC_022_03895
IG35	14	Compatibility	group_18840	Accessory	Sulfite exporter TauE/SafE	{COG0730 Predicted permeases R General function prediction only ;}	{NA}	Scaffold31	9946	10839	C1_8_04685
IG35	14	Compatibility	group_1951	Accessory	hypothetical protein	{NA}	{NA}	NC_021848.1	2645995	2646786	CDC_K4557_02427
IG35	14	Compatibility	group_1954	Accessory	Prophage CP4-57 integrase	{COG0582 Integrase L Replication, recombination and repair ;}	{NA}	CP013249.1	861605	862825	FORC_022_03924
IG35	14	Compatibility	group_2261	Accessory	hypothetical protein	{NA}	{NA}	CP013249.1	734050	734991	FORC_022_03819
IG35	14	Compatibility	group_2411	Accessory	Tetratricopeptide repeat protein	{NA}	{NA}	CP013249.1	833746	837060	FORC_022_03908
IG35	14	Compatibility	group_2587	Accessory	LysM domain protein	{NA}	{NA}	Scaffold27	66	767	C1_8_04618
IG35	14	Compatibility	group_3570	Accessory	Prophage CP4-57 regulatory protein (AlpA)	{COG3311 Predicted transcriptional regulator K Transcription ;}	{NA}	CP013249.1	739461	739643	FORC_022_03826
IG35	14	Compatibility	group_3571	Accessory	hypothetical protein	{NA}	{NA}	NC_021848.1	2645416	2645847	CDC_K4557_02426
IG35	14	Compatibility	group_3586	Accessory	HTH-type transcriptional regulator YidZ	{NA}	{NA}	CP013249.1	732753	733631	FORC_022_03818
IG35	14	Compatibility	group_3840	Accessory	hypothetical protein	{NA}	{NA}	Scaffold83	210	440	C1_8_04794
IG35	14	Compatibility	group_3845	Accessory	hypothetical protein	{NA}	{NA}	Scaffold16	70932	71723	B8_6_04255
IG35	14	Compatibility	group_3891	Accessory	hypothetical protein	{NA}	{NA}	CP013249.1	738415	738852	FORC_022_03824
IG35	14	Compatibility	group_407	Accessory	hypothetical protein	{NA}	{NA}	CP013249.1	736317	737480	FORC_022_03822
IG35	14	Compatibility	group_4121	Accessory	hypothetical protein	{NA}	{NA}	NC_021822.1	625130	625354	CDC_K4557_03623
IG35	14	Compatibility	group_4409	Accessory	Prophage CP4-57 regulatory protein (AlpA)	{COG3311 Predicted transcriptional regulator K Transcription ;}	{NA}	NC_021822.1	610619	610798	CDC_K4557_03608
IG35	14	Compatibility	group_4515	Accessory	Type-1 restriction enzyme EcoKI specificity protein	{NA}	{NA}	CP013249.1	850076	851818	FORC_022_03918
IG35	14	Compatibility	group_5012	Accessory	Type-1 restriction enzyme R protein	{NA}	{NA}	Scaffold27	3179	6265	C1_8_04622
IG35	14	Compatibility	group_5203	Accessory	hypothetical protein	{NA}	{NA}	CP013249.1	735111	735263	FORC_022_03820
IG35	14	Compatibility	group_5309	Accessory	hypothetical protein	{NA}	{NA}	CP013249.1	759070	760683	FORC_022_03844
IG35	14	Compatibility	group_5329	Accessory	Transcriptional activator CadC	{NA}	{NA}	NC_021822.1	626332	627702	CDC_K4557_03624
IG35	14	Compatibility	group_5656	Accessory	hypothetical protein	{NA}	{NA}	NC_021848.1	2644242	2644466	CDC_K4557_02424
IG35	14	Compatibility	group_5686	Accessory	Major Facilitator Superfamily protein	{NA}	{NA}	NC_021822.1	633894	634967	CDC_K4557_03630
IG35	14	Compatibility	group_6283	Accessory	YibE/F-like protein	{NA}	{NA}	CP013249.1	843508	844683	FORC_022_03913
IG35	14	Compatibility	group_6304	Accessory	oxaloacetate decarboxylase subunit gamma	{COG3630 Na+-transporting methylmalonyl-CoA/oxaloacetate decarboxylase, gamma subunit C Energy production and conversion ;}	{NA}	NC_021822.1	616901	617152	CDC_K4557_03614
IG35	14	Compatibility	group_6305	Accessory	Methylmalonyl-CoA carboxyltransferase 5S subunit	{NA}	{PBPRA2298 K01571 4.1.1.3 ppr00620 Pyruvate metabolism - Photobacterium profundum Metabolism; Carbohydrate Metabolism}	NC_021822.1	615078	616889	CDC_K4557_03613
IG35	14	Compatibility	group_6479	Accessory	hypothetical protein	{NA}	{NA}	CP013249.1	764464	764898	FORC_022_03848
IG35	14	Compatibility	group_6500	Accessory	Type-1 restriction enzyme R protein	{NA}	{NA}	CP013249.1	847239	850079	FORC_022_03917
IG35	14	Compatibility	group_7123	Accessory	hypothetical protein	{COG2003 DNA repair proteins L Replication, recombination and repair ;}	{NA}	NC_021848.1	2644946	2645419	CDC_K4557_02425
IG35	14	Compatibility	group_7194	Accessory	hypothetical protein	{NA}	{NA}	NC_021822.1	634978	635649	CDC_K4557_03631
IG35	14	Compatibility	group_7361	Accessory	CRISPR-associated protein Csy3	{NA}	{NA}	CP013249.1	824757	825788	FORC_022_03902
IG35	14	Compatibility	group_7527	Accessory	hypothetical protein	{NA}	{NA}	CP013249.1	856910	858325	FORC_022_03922
IG35	14	Compatibility	group_7528	Accessory	hypothetical protein	{NA}	{NA}	CP013249.1	858338	861529	FORC_022_03923
IG35	14	Compatibility	group_7533	Accessory	Type II secretion system protein D precursor	{NA}	{VIBHAR_06196 K02280 vha03090 Type II secretion system - Vibrio harveyi Genetic Information Processing; Folding, Sorting and Degradation}	CP013249.1	786104	787474	FORC_022_03865
IG35	14	Compatibility	group_7534	Accessory	Bacterial type II secretion system protein F domain protein	{NA}	{NA}	CP013249.1	790461	791363	FORC_022_03869
IG35	14	Compatibility	group_7535	Accessory	Photosystem I assembly protein Ycf3	{NA}	{NA}	CP013249.1	792212	792934	FORC_022_03871
IG35	14	Compatibility	group_7536	Accessory	hypothetical protein	{NA}	{NA}	CP013249.1	796281	797705	FORC_022_03876
IG35	14	Compatibility	group_8009	Accessory	hypothetical protein	{NA}	{NA}	Scaffold8	4764	4925	C1_8_02730
IG35	14	Compatibility	group_838	Accessory	hypothetical protein	{NA}	{NA}	NC_021848.1	2649345	2650151	CDC_K4557_02430
IG35	14	Compatibility	group_9079	Accessory	hypothetical protein	{NA}	{NA}	CP013249.1	765963	766214	FORC_022_03850
IG35	14	Compatibility	group_9130	Accessory	L-arabonate dehydratase	{COG0129 Dihydroxyacid dehydratase/phosphogluconate dehydratase EG Amino acid transport and metabolism ; Carbohydrate transport and metabolism ;}	{Mmwyl1_0518 K01687 4.2.1.9 mmw00770 Pantothenate and CoA biosynthesis - Marinomonas sp. MWYL1 Metabolism; Metabolism of Cofactors and Vitamins}	Scaffold31	3910	5661	C1_8_04679
IG35	14	Compatibility	group_9133	Accessory	hypothetical protein	{NA}	{NA}	Scaffold1	311491	312033	F8_2_00271
IG35	14	Compatibility	group_9137	Accessory	Putative conjugal transfer protein/MT3759	{COG4962 Flp pilus assembly protein, ATPase CpaF U Intracellular trafficking, secretion, and vesicular transport ;}	{VIBHAR_06193 K02283 vha03090 Type II secretion system - Vibrio harveyi Genetic Information Processing; Folding, Sorting and Degradation}	CP013249.1	789188	790459	FORC_022_03868
IG35	14	Compatibility	group_9138	Accessory	hypothetical protein	{NA}	{NA}	CP013249.1	793971	795518	FORC_022_03874
IG35	14	Compatibility	group_9140	Accessory	putative type I restriction enzymeP M protein	{COG0286 Type I restriction-modification system methyltransferase subunit V Defense mechanisms ;}	{NA}	CP013249.1	854657	856195	FORC_022_03921
IG35	14	Compatibility	group_936	Accessory	Integrase core domain protein	{COG2801 Transposase and inactivated derivatives L Replication, recombination and repair ;}	{NA}	CP013249.1	765368	765931	FORC_022_03849
IG35	14	Compatibility	gutB_3	Accessory	Sorbitol dehydrogenase	{NA}	{NA}	CP013249.1	774765	775775	FORC_022_03858
IG35	14	Compatibility	hpcH	Accessory	4-hydroxy-2-oxo-heptane-1,7-dioate aldolase	{NA}	{NA}	Scaffold31	5672	6463	C1_8_04680
IG35	14	Compatibility	hrp1_3	Accessory	Hypoxic response protein 1	{NA}	{NA}	CP013249.1	799763	801535	FORC_022_03880
IG35	14	Compatibility	intA	Accessory	Prophage CP4-57 integrase	{NA}	{NA}	Scaffold18	75301	76641	C1_8_04245
IG35	14	Compatibility	kdgK_3	Accessory	2-dehydro-3-deoxygluconokinase	{COG0524 Sugar kinases, ribokinase family G Carbohydrate transport and metabolism ;}	{VV2_1071 K00874 2.7.1.45 vvu00040 Pentose and glucuronate interconversions - Vibrio vulnificus CMCP6 Metabolism; Carbohydrate Metabolism}	CP013249.1	811707	812654	FORC_022_03891
IG35	14	Compatibility	kduD_2	Accessory	2-dehydro-3-deoxy-D-gluconate 5-dehydrogenase	{COG1028 Dehydrogenases with different specificities (related to short-chain alcohol dehydrogenases) IQR Lipid transport and metabolism ; Secondary metabolites biosynthesis, transport and catabolism ; General function prediction only ;}	{VVA1401 K00065 1.1.1.125 vvy00040 Pentose and glucuronate interconversions - Vibrio vulnificus YJ016 Metabolism; Carbohydrate Metabolism}	CP013249.1	810857	811609	FORC_022_03890
IG35	14	Compatibility	kduI	Accessory	4-deoxy-L-threo-5-hexosulose-uronate ketol-isomerase	{COG3717 5-keto 4-deoxyuronate isomerase G Carbohydrate transport and metabolism ;}	{ECA2400 kduI1 K01815 5.3.1.17 eca00040 Pentose and glucuronate interconversions - Erwinia carotovora Metabolism; Carbohydrate Metabolism}	CP013249.1	810014	810847	FORC_022_03889
IG35	14	Compatibility	lamB_2	Accessory	Maltoporin precursor	{NA}	{NA}	CP013249.1	805494	806741	FORC_022_03886
IG35	14	Compatibility	mdh_3	Accessory	NAD-dependent methanol dehydrogenase	{COG1454 Alcohol dehydrogenase, class IV C Energy production and conversion ;}	{KPK_5475 kpe00982 Drug metabolism - cytochrome P450 - Klebsiella pneumoniae 342 Metabolism; Xenobiotics Biodegradation and Metabolism}	CP013249.1	753631	754773	FORC_022_03839
IG35	14	Compatibility	mhpD	Accessory	2-keto-4-pentenoate hydratase	{NA}	{NA}	CP013249.1	832374	833321	FORC_022_03907
IG35	14	Compatibility	mrr	Accessory	Mrr restriction system protein	{COG1715 Restriction endonuclease V Defense mechanisms ;}	{NA}	CP013249.1	846303	847223	FORC_022_03916
IG35	14	Compatibility	nagC_3	Accessory	N-acetylglucosamine repressor	{COG1940 Transcriptional regulator/sugar kinase KG Transcription ; Carbohydrate transport and metabolism ;}	{NA}	CP013249.1	839685	840914	FORC_022_03911
IG35	14	Compatibility	nfdA_2	Accessory	N-substituted formamide deformylase precursor	{NA}	{NA}	NC_021822.1	631953	633698	CDC_K4557_03629
IG35	14	Compatibility	oadB	Accessory	Oxaloacetate decarboxylase beta chain	{COG1883 Na+-transporting methylmalonyl-CoA/oxaloacetate decarboxylase, beta subunit C Energy production and conversion ;}	{PBPRA2299 K01572 4.1.1.3 ppr00620 Pyruvate metabolism - Photobacterium profundum Metabolism; Carbohydrate Metabolism}	NC_021822.1	613761	615062	CDC_K4557_03612
IG35	14	Compatibility	ompF	Accessory	Outer membrane protein F precursor	{NA}	{NA}	NC_021822.1	629159	630223	CDC_K4557_03627
IG35	14	Compatibility	pdhB_2	Accessory	Pyruvate dehydrogenase E1 component subunit beta	{COG3958 Transketolase, C-terminal subunit G Carbohydrate transport and metabolism ;}	{BL05028 K00615 2.2.1.1 bli01051 Biosynthesis of ansamycins - Bacillus licheniformis ATCC 14580 Metabolism; Biosynthesis of Polyketides and Nonribosomal Peptides}	CP013249.1	768162	769139	FORC_022_03853
IG35	14	Compatibility	pkn1	Accessory	Serine/threonine-protein kinase pkn1	{NA}	{NA}	Scaffold27	822	1877	C1_8_04619
IG35	14	Compatibility	polC_6	Accessory	DNA polymerase III PolC-type	{NA}	{NA}	CP013249.1	799056	799397	FORC_022_03878
IG35	14	Compatibility	qacA	Accessory	Antiseptic resistance protein	{NA}	{NA}	NC_021822.1	630244	631854	CDC_K4557_03628
IG35	14	Compatibility	recD_2	Accessory	RecBCD enzyme subunit RecD	{NA}	{NA}	CP013249.1	776815	780165	FORC_022_03859
IG35	14	Compatibility	recF_3	Accessory	DNA replication and repair protein RecF	{NA}	{NA}	CP013249.1	851818	853515	FORC_022_03919
IG35	14	Compatibility	recX_2	Accessory	Regulatory protein RecX	{NA}	{NA}	Scaffold79	11	382	C1_8_04791
IG35	14	Compatibility	rhaA	Accessory	L-rhamnose isomerase	{COG4806 L-rhamnose isomerase G Carbohydrate transport and metabolism ;}	{SEN3837 rhaA set00051 Fructose and mannose metabolism - Salmonella enterica subsp. enterica serovar Enteritidis Metabolism; Carbohydrate Metabolism}	CP013249.1	755666	756925	FORC_022_03841
IG35	14	Compatibility	rhaB	Accessory	Rhamnulokinase	{COG1070 Sugar (pentulose and hexulose) kinases G Carbohydrate transport and metabolism ;}	{Ent638_4067 rhaB K00848 2.7.1.5 ent00051 Fructose and mannose metabolism - Enterobacter sp. 638 Metabolism; Carbohydrate Metabolism}	CP013249.1	756937	758382	FORC_022_03842
IG35	14	Compatibility	rhaD	Accessory	Rhamnulose-1-phosphate aldolase	{NA}	{BT_3766 K01629 4.1.2.19 bth00051 Fructose and mannose metabolism - Bacteroides thetaiotaomicron Metabolism; Carbohydrate Metabolism}	CP013249.1	754784	755584	FORC_022_03840
IG35	14	Compatibility	rhaM	Accessory	L-rhamnose mutarotase	{COG3254 Uncharacterized conserved protein S Function unknown ;}	{NA}	CP013249.1	758734	759057	FORC_022_03843
IG35	14	Compatibility	rhaS_4	Accessory	HTH-type transcriptional activator RhaS	{NA}	{NA}	CP013249.1	761063	761887	FORC_022_03845
IG35	14	Compatibility	tktB	Accessory	Transketolase 2	{COG3959 Transketolase, N-terminal subunit G Carbohydrate transport and metabolism ;}	{CKO_00492 K00615 2.2.1.1 cko00710 Carbon fixation - Citrobacter koseri ATCC BAA-895 Metabolism; Energy Metabolism}	CP013249.1	769151	769972	FORC_022_03854
IG35	14	Compatibility	ugl	Accessory	Unsaturated glucuronyl hydrolase	{NA}	{NA}	CP013249.1	807070	808230	FORC_022_03887
IG35	14	Compatibility	xylE	Accessory	D-xylose-proton symporter	{COG0477 Permeases of the major facilitator superfamily GEPR Carbohydrate transport and metabolism ; Amino acid transport and metabolism ; Inorganic ion transport and metabolism ; General function prediction only ;}	{NA}	CP013249.1	837140	838567	FORC_022_03909
IG35	14	Compatibility	yajL_2	Accessory	Chaperone protein YajL	{COG0693 Putative intracellular protease/amidase R General function prediction only ;}	{NA}	CP013249.1	813288	813869	FORC_022_03893
IG35	14	Compatibility	yfkN_4	Accessory	Trifunctional nucleotide phosphoesterase protein YfkN precursor	{NA}	{NA}	CP013249.1	841221	843416	FORC_022_03912
IG35	14	Compatibility	yidH	Accessory	Inner membrane protein YidH	{COG2149 Predicted membrane protein S Function unknown ;}	{NA}	CP013249.1	816519	816875	FORC_022_03896
IG35	14	Compatibility	yidK	Accessory	putative symporter YidK	{COG4146 Predicted symporter R General function prediction only ;}	{NA}	Scaffold31	1965	3755	C1_8_04678
IG35	14	Compatibility	yofA	Accessory	HTH-type transcriptional regulator YofA	{NA}	{NA}	CP013249.1	783090	783980	FORC_022_03861
IG34	14	Compatibility	group_152	Accessory	Phage related protein	{NA}	{NA}	MIRQ01000044.1	131571	131939	GCSL_R77_03609
IG34	14	Compatibility	group_1817	Accessory	Bacteriophage replication gene A protein (GPA)	{NA}	{NA}	MIRQ01000044.1	132411	134441	GCSL_R77_03611
IG34	14	Compatibility	group_2392	Accessory	Phage major coat protein, Gp8	{NA}	{NA}	MIRQ01000044.1	135101	135364	GCSL_R77_03614
IG34	14	Compatibility	group_2888	Accessory	hypothetical protein	{NA}	{NA}	MIRQ01000044.1	132139	132411	GCSL_R77_03610
IG34	14	Compatibility	group_2889	Accessory	Putative type II secretion system protein D precursor	{NA}	{NA}	MIRQ01000044.1	138517	139869	GCSL_R77_03618
IG34	14	Compatibility	group_3082	Accessory	hypothetical protein	{NA}	{NA}	MIRQ01000044.1	135442	137067	GCSL_R77_03615
IG34	14	Compatibility	group_318	Accessory	hypothetical protein	{NA}	{NA}	MIRQ01000044.1	139907	140545	GCSL_R77_03619
IG34	14	Compatibility	group_34	Accessory	hypothetical protein	{NA}	{NA}	MIRQ01000044.1	142363	142728	GCSL_R77_03621
IG34	14	Compatibility	group_4439	Accessory	hypothetical protein	{NA}	{NA}	MIRQ01000044.1	137067	137426	GCSL_R77_03616
IG34	14	Compatibility	group_8403	Accessory	hypothetical protein	{NA}	{NA}	MIRQ01000044.1	134519	134830	GCSL_R77_03612
IG34	14	Compatibility	gspD	Accessory	Zonular occludens toxin (Zot)	{NA}	{NA}	MIRQ01000044.1	137426	138499	GCSL_R77_03617
IG33	14	Compatibility	dcm	Accessory	DNA-cytosine methyltransferase	{COG0270 Site-specific DNA methylase L Replication, recombination and repair ;}	{SeSA_A4747 sew00271 Methionine metabolism - Salmonella enterica subsp. enterica serovar Schwarzengrund Metabolism; Amino Acid Metabolism}	BAVK01000003.1	9699	11402	TUMSAT_H10_S6_03014
IG33	14	Compatibility	group_12754	Accessory	DNA relaxase MbeA	{NA}	{NA}	BAVK01000003.1	5805	7616	TUMSAT_H10_S6_03012
IG33	14	Compatibility	group_3830	Accessory	Tyrosine recombinase XerC	{NA}	{NA}	BAVK01000003.1	263	1597	TUMSAT_H10_S6_03006
IG33	14	Compatibility	group_3831	Accessory	site-specific tyrosine recombinase XerC	{NA}	{NA}	BAVK01000003.1	2935	4242	TUMSAT_H10_S6_03009
IG33	14	Compatibility	group_3832	Accessory	hypothetical protein	{NA}	{NA}	BAVK01000003.1	4245	5069	TUMSAT_H10_S6_03010
IG33	14	Compatibility	group_4425	Accessory	hypothetical protein	{NA}	{NA}	BAVK01000003.1	5227	5814	TUMSAT_H10_S6_03011
IG33	14	Compatibility	group_6595	Accessory	hypothetical protein	{NA}	{NA}	BAVK01000003.1	1600	2379	TUMSAT_H10_S6_03007
IG33	14	Compatibility	group_6639	Accessory	hypothetical protein	{NA}	{NA}	BAVK01000003.1	8051	9664	TUMSAT_H10_S6_03013
IG33	14	Compatibility	group_9396	Accessory	hypothetical protein	{NA}	{NA}	BAVK01000003.1	2388	2591	TUMSAT_H10_S6_03008
IG32	14	Compatibility	group_1509	Accessory	hypothetical protein	{NA}	{NA}	MISK01000001.1	711902	712507	GCSL_R143_00632	VP2139
IG32	14	Compatibility	group_1827	Accessory	hypothetical protein	{NA}	{NA}	MISK01000001.1	713544	715058	GCSL_R143_00634	VP2137
IG32	14	Compatibility	group_3569	Accessory	hypothetical protein	{NA}	{NA}	MISK01000001.1	720848	721231	GCSL_R143_00640	VP2132
IG32	14	Compatibility	group_4782	Accessory	hypothetical protein	{NA}	{NA}	MISK01000001.1	720636	720833	GCSL_R143_00639	VP2133
IG32	14	Compatibility	group_8495	Accessory	hypothetical protein	{NA}	{NA}	MISK01000001.1	715055	715228	GCSL_R143_00635
IG32	14	Compatibility	hipB	Accessory	transcription regulator protein	{NA}	{NA}	MISK01000001.1	706383	706637	GCSL_R143_00630	VP2144
IG32	14	Compatibility	Int-Tn	Accessory	pore-forming cytotoxin integrase	{NA}	{NA}	MISK01000001.1	715225	716337	GCSL_R143_00636	VP2136
IG32	14	Compatibility	smc	Accessory	Chromosome partition protein Smc	{NA}	{NA}	MISK01000001.1	712476	713495	GCSL_R143_00633	VP2138
IG32	14	Compatibility	xerC_1	Accessory	Tyrosine recombinase XerC	{NA}	{NA}	MISK01000001.1	721224	722579	GCSL_R143_00641	VP2131
IG44	13	Incompatibility	group_9433	Accessory	hypothetical protein	{NA}	{NA}	Scaffold24	6279	8921	F5_4_03676
IG44	13	Incompatibility	polC_2	Accessory	DNA polymerase III PolC-type	{NA}	{VPA0793 K02342 2.7.7.7 vpa03440 Homologous recombination - Vibrio parahaemolyticus Genetic Information Processing; Replication and Repair}	JWSS01000002.1	627973	628587	10329_03700	VPA0793
IG43	13	Compatibility	group_5658	Accessory	hypothetical protein	{NA}	{NA}	JPKS01000014.1	4496	4954	NCKU_TV_3HP_01593
IG43	13	Compatibility	group_6248	Accessory	hypothetical protein	{NA}	{NA}	JPKS01000014.1	8552	9172	NCKU_TV_3HP_01596
IG42	13	Incompatibility	group_3089	Accessory	54 kDa polar flagellar sheath protein A	{NA}	{NA}	NC_004603.1	1042470	1043930	VP0996	VP0996
IG42	13	Incompatibility	group_3945	Accessory	hypothetical protein	{NA}	{NA}	CP013826.1	2224317	2225678	FORC_018_02035
IG42	13	Incompatibility	group_5382	Accessory	hypothetical protein	{NA}	{NA}	CP003972.1	1046124	1047590	BB22OP_00981
IG41	13	Incompatibility	VP2410	Core	tight adherence TadC-like transmembrane protein	{NA}	{NA}	NC_004603.1	2530170	2531111	VP2410	VP2410
IG41	13	Incompatibility	VP2411	Core	tight adherence TadB-like transmembrane protein	{NA}	{NA}	NC_004603.1	2531114	2532082	VP2411	VP2411
IG41	13	Incompatibility	VP2412	Core	pilus assembly protein	{COG4962 Flp pilus assembly protein, ATPase CpaF U Intracellular trafficking, secretion, and vesicular transport ;}	{VP2412 K02283 vpa03090 Type II secretion system - Vibrio parahaemolyticus Genetic Information Processing; Folding, Sorting and Degradation}	NC_004603.1	2532094	2533545	VP2412	VP2412
IG41	13	Incompatibility	VP2413	Core	pilus assembly protein	{NA}	{VP2413 K02282 vpa03090 Type II secretion system - Vibrio parahaemolyticus Genetic Information Processing; Folding, Sorting and Degradation}	NC_004603.1	2533558	2534766	VP2413	VP2413
IG41	13	Incompatibility	VP2414	Core	hypothetical protein	{NA}	{NA}	NC_004603.1	2534779	2535297	VP2414	VP2414
IG41	13	Incompatibility	VP2415	Core	hypothetical protein	{NA}	{NA}	NC_004603.1	2535294	2535572	VP2415	VP2415
IG41	13	Incompatibility	VP2417	Core	hypothetical protein	{NA}	{NA}	NC_004603.1	2535760	2537055	VP2417	VP2417
IG41	13	Incompatibility	VP2418	Core	hypothetical protein	{NA}	{NA}	NC_004603.1	2537056	2537280	VP2418	VP2418
IG41	13	Incompatibility	VP2419	Core	pilus assembly transmembrane protein	{NA}	{VP2419 K02280 vpa03090 Type II secretion system - Vibrio parahaemolyticus Genetic Information Processing; Folding, Sorting and Degradation}	NC_004603.1	2537293	2538756	VP2419	VP2419
IG41	13	Incompatibility	VP2420	Core	pilus assembly protein	{NA}	{VP2420 K02279 vpa03090 Type II secretion system - Vibrio parahaemolyticus Genetic Information Processing; Folding, Sorting and Degradation}	NC_004603.1	2538764	2539519	VP2420	VP2420
IG41	13	Incompatibility	VP2422	Core	hypothetical protein	{NA}	{VP2422 K02278 3.4.23.43 vpa03090 Type II secretion system - Vibrio parahaemolyticus Genetic Information Processing; Folding, Sorting and Degradation}	NC_004603.1	2540909	2541397	VP2422	VP2422
IG41	13	Incompatibility	group_3058	Accessory	fimbrial protein	{NA}	{VP2423 K02651 vpa03090 Type II secretion system - Vibrio parahaemolyticus Genetic Information Processing; Folding, Sorting and Degradation}	NC_004603.1	2541397	2541570	VP2423	VP2423
IG41	13	Incompatibility	group_4405	Accessory	hypothetical protein	{NA}	{NA}	CP010883.1	2594488	2595750	CHN25_02404
IG41	13	Incompatibility	group_7091	Accessory	hypothetical protein	{NA}	{VP2423 K02651 vpa03090 Type II secretion system - Vibrio parahaemolyticus Genetic Information Processing; Folding, Sorting and Degradation}	CP010883.1	2600123	2600302	CHN25_02410
IG41	13	Incompatibility	group_7092	Accessory	TadE-like protein	{NA}	{NA}	CP010883.1	2593510	2594028	CHN25_02402
IG40	13	Compatibility	dinB_1	Accessory	DNA polymerase IV	{COG0389 Nucleotidyltransferase/DNA polymerase involved in DNA repair L Replication, recombination and repair ;}	{NA}	JYJU01000134.1	83103	84152	10-4287_01061
IG40	13	Compatibility	group_11471	Accessory	anaerobic benzoate catabolism transcriptional regulator	{COG1396 Predicted transcriptional regulators K Transcription ;}	{NA}	JYJU01000134.1	96664	96882	10-4287_01070
IG40	13	Compatibility	group_2423	Accessory	hypothetical protein	{NA}	{NA}	JYJU01000134.1	97484	100267	10-4287_01072
IG40	13	Compatibility	group_3373	Accessory	hypothetical protein	{NA}	{NA}	JYJU01000134.1	100276	102528	10-4287_01073
IG40	13	Compatibility	group_3619	Accessory	hypothetical protein	{NA}	{NA}	JYJU01000134.1	102521	103753	10-4287_01074
IG40	13	Compatibility	group_4470	Accessory	hypothetical protein	{NA}	{NA}	JYJU01000134.1	96940	97491	10-4287_01071
IG40	13	Compatibility	group_7371	Accessory	hypothetical protein	{NA}	{NA}	JYJU01000134.1	95956	96492	10-4287_01069
IG39	13	Compatibility	group_12962	Accessory	hypothetical protein	{NA}	{NA}	MIRA01000099.1	1942	2148	GCSL_R47_02932
IG39	13	Compatibility	group_1483	Accessory	hypothetical protein	{NA}	{NA}	MIRA01000099.1	8257	8727	GCSL_R47_02940
IG39	13	Compatibility	group_2737	Accessory	hypothetical protein	{NA}	{NA}	MIRA01000099.1	7787	8161	GCSL_R47_02939
IG39	13	Compatibility	group_344	Accessory	Tyrosine recombinase XerD	{NA}	{NA}	MIRA01000100.1	1760	2953	GCSL_R47_02944
IG39	13	Compatibility	group_345	Accessory	hypothetical protein	{NA}	{NA}	MIRA01000100.1	1387	1749	GCSL_R47_02943
IG39	13	Compatibility	group_5782	Accessory	hypothetical protein	{NA}	{NA}	MIRA01000099.1	7542	7715	GCSL_R47_02938
IG38	13	Compatibility	group_10816	Accessory	hypothetical protein	{NA}	{NA}	MCFR01000002.1	71611	71925	R10B2_71_01393
IG38	13	Compatibility	group_10817	Accessory	hypothetical protein	{NA}	{NA}	MCFR01000002.1	70147	70632	R10B2_71_01391
IG38	13	Compatibility	group_10818	Accessory	hypothetical protein	{NA}	{SG1561 sfcA seg00620 Pyruvate metabolism - Salmonella enterica subsp. enterica serovar Gallinarum Metabolism; Carbohydrate Metabolism}	MCFR01000002.1	69019	69324	R10B2_71_01388
IG38	13	Compatibility	group_10819	Accessory	hypothetical protein	{NA}	{NA}	MCFR01000002.1	68668	68859	R10B2_71_01386
IG38	13	Compatibility	group_10820	Accessory	hypothetical protein	{NA}	{NA}	MCFR01000002.1	65459	65851	R10B2_71_01380
IG38	13	Compatibility	group_10821	Accessory	hypothetical protein	{NA}	{NA}	MCFR01000002.1	64677	64961	R10B2_71_01378
IG38	13	Compatibility	group_10824	Accessory	hypothetical protein	{NA}	{NA}	MCFR01000002.1	52362	52874	R10B2_71_01362
IG38	13	Compatibility	group_11221	Accessory	hypothetical protein	{NA}	{NA}	MCFR01000002.1	34888	35148	R10B2_71_01345
IG38	13	Compatibility	group_11365	Accessory	hypothetical protein	{NA}	{NA}	MCFR01000002.1	35684	36361	R10B2_71_01347
IG38	13	Compatibility	group_1297	Accessory	hypothetical protein	{NA}	{NA}	MCFR01000002.1	58246	58389	R10B2_71_01367
IG38	13	Compatibility	group_15911	Accessory	hypothetical protein	{NA}	{NA}	MCFR01000002.1	70577	71536	R10B2_71_01392
IG38	13	Compatibility	group_16080	Accessory	hypothetical protein	{NA}	{NA}	MCFR01000002.1	66993	67451	R10B2_71_01383
IG38	13	Compatibility	group_16085	Accessory	hypothetical protein	{NA}	{NA}	MCFR01000002.1	52040	52357	R10B2_71_01361
IG38	13	Compatibility	group_16086	Accessory	hypothetical protein	{NA}	{NA}	MCFR01000002.1	51528	52013	R10B2_71_01360
IG38	13	Compatibility	group_16087	Accessory	hypothetical protein	{NA}	{NA}	MCFR01000002.1	47886	48350	R10B2_71_01356
IG38	13	Compatibility	group_16967	Accessory	hypothetical protein	{NA}	{NA}	MCFR01000002.1	36354	36770	R10B2_71_01348
IG38	13	Compatibility	group_257	Accessory	hypothetical protein	{NA}	{NA}	MCFR01000002.1	42064	46608	R10B2_71_01353
IG38	13	Compatibility	group_3792	Accessory	hypothetical protein	{NA}	{NA}	MCFR01000002.1	65956	66384	R10B2_71_01381
IG38	13	Compatibility	group_3793	Accessory	Fibronectin type III protein	{NA}	{NA}	MCFR01000002.1	36833	39250	R10B2_71_01349
IG38	13	Compatibility	group_3851	Accessory	hypothetical protein	{NA}	{NA}	MCFR01000002.1	33125	34876	R10B2_71_01344
IG38	13	Compatibility	group_3859	Accessory	Putative prophage CPS-53 integrase	{NA}	{NA}	MCFR01000002.1	77480	78640	R10B2_71_01401
IG38	13	Compatibility	group_4083	Accessory	hypothetical protein	{NA}	{NA}	MCFR01000002.1	57750	58172	R10B2_71_01366
IG38	13	Compatibility	group_4084	Accessory	hypothetical protein	{NA}	{NA}	MCFR01000002.1	48970	50193	R10B2_71_01358
IG38	13	Compatibility	group_4148	Accessory	hypothetical protein	{NA}	{NA}	MCFR01000002.1	21983	22534	R10B2_71_01342
IG38	13	Compatibility	group_4387	Accessory	hypothetical protein	{NA}	{NA}	MCFR01000002.1	75629	76255	R10B2_71_01398
IG38	13	Compatibility	group_4388	Accessory	hypothetical protein	{NA}	{NA}	MCFR01000002.1	69785	70150	R10B2_71_01390
IG38	13	Compatibility	group_4389	Accessory	Phd_YefM	{NA}	{NA}	MCFR01000002.1	59529	59771	R10B2_71_01370	VP1886
IG38	13	Compatibility	group_4390	Accessory	hypothetical protein	{NA}	{NA}	MCFR01000002.1	46628	47299	R10B2_71_01354
IG38	13	Compatibility	group_4745	Accessory	hypothetical protein	{NA}	{NA}	MCFR01000002.1	39251	40861	R10B2_71_01350
IG38	13	Compatibility	group_4906	Accessory	hypothetical protein	{NA}	{NA}	MCFR01000002.1	47308	47883	R10B2_71_01355
IG38	13	Compatibility	group_5128	Accessory	hypothetical protein	{NA}	{NA}	MCFR01000002.1	66627	66923	R10B2_71_01382
IG38	13	Compatibility	group_5129	Accessory	hypothetical protein	{NA}	{NA}	MCFR01000002.1	48464	48910	R10B2_71_01357
IG38	13	Compatibility	group_5606	Accessory	hypothetical protein	{NA}	{NA}	MCFR01000002.1	76240	76449	R10B2_71_01399
IG38	13	Compatibility	group_5607	Accessory	hypothetical protein	{NA}	{NA}	MCFR01000002.1	68862	69011	R10B2_71_01387
IG38	13	Compatibility	group_5609	Accessory	Plasmid stabilisation system protein	{NA}	{NA}	MCFR01000002.1	59181	59516	R10B2_71_01369
IG38	13	Compatibility	group_5833	Accessory	hypothetical protein	{NA}	{NA}	MCFR01000002.1	55011	56804	R10B2_71_01364
IG38	13	Compatibility	group_6169	Accessory	hypothetical protein	{NA}	{NA}	MCFR01000002.1	74442	75632	R10B2_71_01397
IG38	13	Compatibility	group_6170	Accessory	hypothetical protein	{NA}	{NA}	MCFR01000002.1	67529	67801	R10B2_71_01384
IG38	13	Compatibility	group_6173	Accessory	hypothetical protein	{NA}	{NA}	MCFR01000002.1	58414	58995	R10B2_71_01368
IG38	13	Compatibility	group_6174	Accessory	hypothetical protein	{NA}	{NA}	MCFR01000002.1	52894	54999	R10B2_71_01363
IG38	13	Compatibility	group_6175	Accessory	hypothetical protein	{NA}	{NA}	MCFR01000002.1	41207	42067	R10B2_71_01352
IG38	13	Compatibility	group_6312	Accessory	hypothetical protein	{NA}	{NA}	MCFR01000002.1	64948	65448	R10B2_71_01379
IG38	13	Compatibility	group_6313	Accessory	Helix-turn-helix	{NA}	{NA}	MCFR01000002.1	72223	72852	R10B2_71_01394
IG38	13	Compatibility	group_7036	Accessory	hypothetical protein	{NA}	{NA}	MCFR01000002.1	73176	73604	R10B2_71_01395
IG38	13	Compatibility	group_7037	Accessory	hypothetical protein	{NA}	{NA}	MCFR01000002.1	69321	69722	R10B2_71_01389
IG38	13	Compatibility	group_7038	Accessory	hypothetical protein	{NA}	{NA}	MCFR01000002.1	67815	68624	R10B2_71_01385
IG38	13	Compatibility	group_7039	Accessory	hypothetical protein	{NA}	{NA}	MCFR01000002.1	64463	64672	R10B2_71_01377
IG38	13	Compatibility	group_7042	Accessory	hypothetical protein	{NA}	{NA}	MCFR01000002.1	50208	51320	R10B2_71_01359
IG38	13	Compatibility	group_829	Accessory	Methyltransferase small domain protein	{NA}	{NA}	MCFR01000002.1	22577	33034	R10B2_71_01343
IG38	13	Compatibility	group_8392	Accessory	hypothetical protein	{NA}	{NA}	MCFR01000002.1	73618	74442	R10B2_71_01396
IG38	13	Compatibility	group_8393	Accessory	hypothetical protein	{NA}	{NA}	MCFR01000002.1	56794	57711	R10B2_71_01365
IG38	13	Compatibility	group_8394	Accessory	hypothetical protein	{NA}	{NA}	MCFR01000002.1	40861	41085	R10B2_71_01351
IG38	13	Compatibility	group_8662	Accessory	hypothetical protein	{NA}	{NA}	MCFR01000002.1	35158	35664	R10B2_71_01346
IG51	12	Compatibility	group_4571	Accessory	hypothetical protein	{NA}	{NA}	PY194_23	99945	100448	PY194_03462
IG51	12	Compatibility	group_4572	Accessory	H-NS histone family protein	{NA}	{NA}	PY194_23	115657	115917	PY194_03477
IG50	12	Compatibility	group_4397	Accessory	hypothetical protein	{NA}	{NA}	NC_004603.1	1125582	1126211	VP1075	VP1075
IG50	12	Compatibility	group_581	Accessory	site-specific tyrosine recombinase XerD	{NA}	{NA}	NC_004603.1	1121252	1122388	VP1071	VP1071
IG49	12	Compatibility	group_22499	Accessory	hypothetical protein	{NA}	{NA}	CP007004.1	263427	264485	UCM-V493_00250
IG49	12	Compatibility	group_7950	Accessory	Sulfotransferase family protein	{NA}	{NA}	CP007004.1	268202	268996	UCM-V493_00253
IG48	12	Incompatibility	VP2697	Core	MSHA pilin protein MshA	{NA}	{NA}	NC_004603.1	2852003	2852245	VP2697	VP2697
IG48	12	Incompatibility	VP2698	Core	V10 pilin	{NA}	{NA}	NC_004603.1	2852305	2852802	VP2698	VP2698
IG48	12	Incompatibility	group_12673	Accessory	hypothetical protein	{NA}	{NA}	Scaffold5	47442	47909	E4_3_00415
IG48	12	Incompatibility	group_20400	Accessory	hypothetical protein	{NA}	{NA}	Scaffold5	45670	46092	E4_3_00412
IG48	12	Incompatibility	group_20655	Accessory	hypothetical protein	{NA}	{NA}	Scaffold5	48025	48249	E4_3_00416
IG48	12	Incompatibility	group_20656	Accessory	hypothetical protein	{NA}	{NA}	Scaffold5	46870	47445	E4_3_00414
IG48	12	Incompatibility	group_2734	Accessory	Type II secretion system protein G precursor	{COG2165 Type II secretory pathway, pseudopilin PulG NU Cell motility ; Intracellular trafficking, secretion, and vesicular transport ;}	{NA}	CP013248.1	2956378	2956869	FORC_022_02784
IG48	12	Incompatibility	group_4194	Accessory	hypothetical protein	{NA}	{NA}	Scaffold5	41094	45665	E4_3_00411
IG48	12	Incompatibility	group_9517	Accessory	hypothetical protein	{NA}	{NA}	Scaffold5	46082	46870	E4_3_00413
IG48	12	Incompatibility	xcpT_1	Accessory	Type II secretion system protein G precursor	{NA}	{NA}	Scaffold5	48315	48821	E4_3_00417
IG47	12	Incompatibility	appA_2	Accessory	Oligopeptide-binding protein AppA precursor	{NA}	{NA}	JWSS01000002.1	92901	94439	10329_03211
IG47	12	Incompatibility	cadC_4	Accessory	DNA-binding transcriptional activator CadC	{NA}	{NA}	JWSS01000002.1	72952	73740	10329_03195
IG47	12	Incompatibility	csy3	Accessory	CRISPR-associated protein Csy3	{NA}	{NA}	JWSS01000002.1	21000	22043	10329_03138	VPA1389
IG47	12	Incompatibility	ddpC	Accessory	putative D,D-dipeptide transport system permease protein DdpC	{COG1173 ABC-type dipeptide/oligopeptide/nickel transport systems, permease components EP Amino acid transport and metabolism ; Inorganic ion transport and metabolism ;}	{VFMJ11_0698 K02034 vfm02010 ABC transporters - Vibrio fischeri MJ11 Environmental Information Processing; Membrane Transport}	JWSS01000002.1	91125	91841	10329_03209
IG47	12	Incompatibility	ddpF	Accessory	putative D,D-dipeptide transport ATP-binding protein DdpF	{COG1124 ABC-type dipeptide/oligopeptide/nickel transport system, ATPase component EP Amino acid transport and metabolism ; Inorganic ion transport and metabolism ;}	{Spea_3640 K02032 spl02010 ABC transporters - Shewanella pealeana Environmental Information Processing; Membrane Transport}	JWSS01000002.1	89822	90448	10329_03207
IG47	12	Incompatibility	fliP_4	Accessory	type III secretion system protein	{NA}	{NA}	CP003973.1	1355981	1356655	BB22OP_04273	VPA1342
IG47	12	Incompatibility	group_10745	Accessory	hypothetical protein	{NA}	{NA}	JWSS01000002.1	63696	63911	10329_03181
IG47	12	Incompatibility	group_10869	Accessory	hypothetical protein	{NA}	{NA}	CP003973.1	1330626	1330835	BB22OP_04242
IG47	12	Incompatibility	group_10871	Accessory	secreted protein EspD	{NA}	{NA}	CP003973.1	1374269	1375318	BB22OP_04294	VPA1362
IG47	12	Incompatibility	group_1225	Accessory	hypothetical protein	{NA}	{NA}	JWSS01000002.1	43467	44183	10329_03161
IG47	12	Incompatibility	group_1226	Accessory	hypothetical protein	{NA}	{NA}	JWSS01000002.1	35761	36795	10329_03153
IG47	12	Incompatibility	group_1378	Accessory	Secretion system effector C (SseC) like family protein	{NA}	{NA}	JWSS01000002.1	47374	48420	10329_03167
IG47	12	Incompatibility	group_14	Accessory	hypothetical protein	{NA}	{NA}	JWSS01000002.1	51012	57170	10329_03173
IG47	12	Incompatibility	group_1591	Accessory	Bacterial Ig-like domain (group 2)	{NA}	{NA}	JWSS01000002.1	103704	105530	10329_03223
IG47	12	Incompatibility	group_16057	Accessory	anaerobic benzoate catabolism transcriptional regulator	{NA}	{NA}	JWSS01000002.1	19771	19977	10329_03136	VPA1391
IG47	12	Incompatibility	group_16155	Accessory	hypothetical protein	{NA}	{NA}	CP003973.1	1332327	1332512	BB22OP_04244
IG47	12	Incompatibility	group_16159	Accessory	Integrase core domain protein	{NA}	{NA}	CP003973.1	1385065	1385292	BB22OP_04306
IG47	12	Incompatibility	group_16162	Accessory	hypothetical protein	{NA}	{NA}	CP003973.1	1349253	1349441	BB22OP_04262
IG47	12	Incompatibility	group_16163	Accessory	type III secretion apparatus protein	{NA}	{NA}	CP003973.1	1351019	1351252	BB22OP_04266	VPA1335
IG47	12	Incompatibility	group_179	Accessory	hypothetical protein	{NA}	{NA}	CP003973.1	1369039	1371669	BB22OP_04288	VPA1357
IG47	12	Incompatibility	group_1804	Accessory	hypothetical protein	{NA}	{NA}	JWSS01000002.1	45159	45617	10329_03164
IG47	12	Incompatibility	group_1878	Accessory	hypothetical protein	{NA}	{NA}	JWSS01000002.1	67772	68023	10329_03186
IG47	12	Incompatibility	group_1999	Accessory	hypothetical protein	{NA}	{NA}	JWSS01000002.1	27990	28256	10329_03144	VPA1259
IG47	12	Incompatibility	group_207	Accessory	WH2 motif protein	{NA}	{NA}	JWSS01000002.1	41838	43256	10329_03160
IG47	12	Incompatibility	group_2070	Accessory	hypothetical protein	{NA}	{NA}	JWSS01000002.1	45650	46138	10329_03165
IG47	12	Incompatibility	group_2250	Accessory	transposase	{NA}	{NA}	CP003973.1	1342805	1343077	BB22OP_04256	VPA1379
IG47	12	Incompatibility	group_2315	Accessory	hypothetical protein	{NA}	{NA}	JWSS01000002.1	106900	107268	10329_03225
IG47	12	Incompatibility	group_2399	Accessory	zinc finger protein	{NA}	{NA}	CP003973.1	1340218	1340652	BB22OP_04253	VPA1322
IG47	12	Incompatibility	group_2478	Accessory	hypothetical protein	{NA}	{NA}	JWSS01000002.1	72492	72965	10329_03194
IG47	12	Incompatibility	group_2547	Accessory	putative hydrolase	{NA}	{ABSDF1529 K01044 3.1.1.1 abm00983 Drug metabolism - other enzymes - Acinetobacter baumannii SDF Metabolism; Xenobiotics Biodegradation and Metabolism}	JWSS01000002.1	113553	114194	10329_03234
IG47	12	Incompatibility	group_2552	Accessory	hypothetical protein	{NA}	{NA}	JWSS01000002.1	50693	51010	10329_03172
IG47	12	Incompatibility	group_2719	Accessory	Type III restriction enzyme, res subunit	{NA}	{NA}	JWSS01000002.1	17754	19127	10329_03134	VPA1393
IG47	12	Incompatibility	group_2812	Accessory	hypothetical protein	{NA}	{NA}	JWSS01000002.1	67096	67779	10329_03185
IG47	12	Incompatibility	group_2896	Accessory	hypothetical protein	{NA}	{NA}	CP003973.1	1385560	1390053	BB22OP_04307	VPA1376
IG47	12	Incompatibility	group_2898	Accessory	targeted effector protein YopP	{NA}	{NA}	CP003973.1	1359347	1360216	BB22OP_04276	VPA1346
IG47	12	Incompatibility	group_2910	Accessory	hypothetical protein	{NA}	{NA}	JWSS01000002.1	62032	63030	10329_03179
IG47	12	Incompatibility	group_314	Accessory	hypothetical protein	{NA}	{NA}	JWSS01000002.1	22030	23952	10329_03139	VPA1388
IG47	12	Incompatibility	group_3184	Accessory	hypothetical protein	{NA}	{NA}	JWSS01000002.1	57300	57896	10329_03174
IG47	12	Incompatibility	group_3320	Accessory	cytotoxic necrotizing factor	{NA}	{NA}	CP003973.1	1339047	1340153	BB22OP_04252	VPA1321
IG47	12	Incompatibility	group_3321	Accessory	transposition protein	{NA}	{NA}	CP003973.1	1404742	1405695	BB22OP_04324	VPA1394
IG47	12	Incompatibility	group_3325	Accessory	hypothetical protein	{NA}	{NA}	JWSS01000002.1	63046	63693	10329_03180
IG47	12	Incompatibility	group_3432	Accessory	Urease operon transcriptional activator	{NA}	{NA}	JWSS01000002.1	88827	89675	10329_03206
IG47	12	Incompatibility	group_346	Accessory	hypothetical protein	{NA}	{NA}	JWSS01000002.1	80378	84748	10329_03201
IG47	12	Incompatibility	group_3564	Accessory	hypothetical protein	{NA}	{NA}	CP003973.1	1360348	1360524	BB22OP_04277
IG47	12	Incompatibility	group_3951	Accessory	hypothetical protein	{NA}	{NA}	CP003973.1	1382072	1384660	BB22OP_04304	VPA1373
IG47	12	Incompatibility	group_3956	Accessory	hypothetical protein	{NA}	{NA}	JWSS01000002.1	107485	108009	10329_03226	VPA1312
IG47	12	Incompatibility	group_4095	Accessory	hypothetical protein	{NA}	{NA}	CP003973.1	1396289	1396585	BB22OP_04315	VPA1384
IG47	12	Incompatibility	group_4261	Accessory	hypothetical protein	{NA}	{NA}	JWSS01000002.1	28487	28948	10329_03145	VPA1258
IG47	12	Incompatibility	group_427	Accessory	hypothetical protein	{NA}	{NA}	JWSS01000002.1	38502	38714	10329_03156
IG47	12	Incompatibility	group_4396	Accessory	traA protein	{NA}	{NA}	CP003973.1	1347072	1347761	BB22OP_04260	VPA1329
IG47	12	Incompatibility	group_4500	Accessory	DNA-binding transcriptional activator CadC	{NA}	{NA}	JWSS01000002.1	64155	64688	10329_03182
IG47	12	Incompatibility	group_4719	Accessory	hypothetical protein	{NA}	{NA}	JWSS01000002.1	49216	49782	10329_03169
IG47	12	Incompatibility	group_4720	Accessory	hypothetical protein	{NA}	{NA}	JWSS01000002.1	48434	49165	10329_03168
IG47	12	Incompatibility	group_4721	Accessory	Secretory protein of YscJ/FliF family protein	{NA}	{NA}	JWSS01000002.1	44618	45157	10329_03163
IG47	12	Incompatibility	group_4766	Accessory	hypothetical protein	{NA}	{NA}	CP003973.1	1344086	1344448	BB22OP_04257	VPA1326
IG47	12	Incompatibility	group_4767	Accessory	OspC2	{NA}	{NA}	CP003973.1	1348434	1348730	BB22OP_04261	VPA1331
IG47	12	Incompatibility	group_4771	Accessory	OspB protein	{NA}	{NA}	CP003973.1	1393658	1394545	BB22OP_04312	VPA1380
IG47	12	Incompatibility	group_4821	Accessory	hypothetical protein	{NA}	{NA}	CP003973.1	1362549	1363196	BB22OP_04281	VPA1350
IG47	12	Incompatibility	group_5022	Accessory	hypothetical protein	{NA}	{NA}	JWSS01000002.1	72118	72495	10329_03193
IG47	12	Incompatibility	group_5110	Accessory	CRISPR-associated protein (Cas_Csy4)	{NA}	{NA}	JWSS01000002.1	20400	20996	10329_03137	VPA1390
IG47	12	Incompatibility	group_5141	Accessory	dimethyladenosine transferase	{NA}	{NA}	CP003973.1	1371967	1372539	BB22OP_04290	VPA1358
IG47	12	Incompatibility	group_5142	Accessory	Cyclic di-GMP phosphodiesterase YahA	{COG2200 FOG: EAL domain T Signal transduction mechanisms ;}	{NA}	CP003973.1	1341276	1341968	BB22OP_04255	VPA1324
IG47	12	Incompatibility	group_5143	Accessory	exoenzyme T	{NA}	{NA}	CP003973.1	1344776	1345486	BB22OP_04258	VPA1327
IG47	12	Incompatibility	group_5144	Accessory	hypothetical protein	{NA}	{NA}	CP003973.1	1350186	1350629	BB22OP_04264	VPA1333
IG47	12	Incompatibility	group_5145	Accessory	hypothetical protein	{NA}	{NA}	CP003973.1	1351239	1351991	BB22OP_04267	VPA1336
IG47	12	Incompatibility	group_5146	Accessory	hypothetical protein	{NA}	{NA}	CP003973.1	1355054	1355302	BB22OP_04271	VPA1340
IG47	12	Incompatibility	group_537	Accessory	hypothetical protein	{NA}	{NA}	JWSS01000002.1	46160	47284	10329_03166
IG47	12	Incompatibility	group_5488	Accessory	hypothetical protein	{NA}	{NA}	CP003973.1	1345837	1346619	BB22OP_04259	VPA1328
IG47	12	Incompatibility	group_5497	Accessory	hypothetical protein	{NA}	{NA}	JWSS01000002.1	70697	71086	10329_03190
IG47	12	Incompatibility	group_5593	Accessory	integral membrane protein	{NA}	{NA}	JWSS01000002.1	25427	25759	10329_03141	VPA1385
IG47	12	Incompatibility	group_560	Accessory	hypothetical protein	{NA}	{NA}	JWSS01000002.1	75334	76638	10329_03197
IG47	12	Incompatibility	group_5633	Accessory	hypothetical protein	{NA}	{NA}	CP003973.1	1407563	1408186	BB22OP_04326	VPA1396
IG47	12	Incompatibility	group_5821	Accessory	hypothetical protein	{NA}	{NA}	JWSS01000002.1	79489	80241	10329_03200
IG47	12	Incompatibility	group_6196	Accessory	hypothetical protein	{NA}	{NA}	CP003973.1	1376226	1376453	BB22OP_04297	VPA1364
IG47	12	Incompatibility	group_6197	Accessory	hypothetical protein	{NA}	{NA}	CP003973.1	1378346	1378603	BB22OP_04301	VPA1368
IG47	12	Incompatibility	group_6198	Accessory	hypothetical protein	{NA}	{NA}	CP003973.1	1378750	1379391	BB22OP_04302	VPA1369
IG47	12	Incompatibility	group_6203	Accessory	transcriptional regulator ToxR	{NA}	{NA}	CP003973.1	1349546	1350160	BB22OP_04263	VPA1332
IG47	12	Incompatibility	group_6204	Accessory	hypothetical protein	{NA}	{NA}	CP003973.1	1368315	1368911	BB22OP_04287	VPA1356
IG47	12	Incompatibility	group_651	Accessory	hypothetical protein	{NA}	{NA}	JWSS01000002.1	71083	71874	10329_03191
IG47	12	Incompatibility	group_7017	Accessory	hypothetical protein	{NA}	{NA}	JWSS01000002.1	49745	50149	10329_03170
IG47	12	Incompatibility	group_7072	Accessory	hypothetical protein	{NA}	{NA}	CP003973.1	1371671	1371970	BB22OP_04289
IG47	12	Incompatibility	group_7073	Accessory	hypothetical protein	{NA}	{NA}	CP003973.1	1372550	1372927	BB22OP_04291	VPA1359
IG47	12	Incompatibility	group_7074	Accessory	hypothetical protein	{NA}	{NA}	CP003973.1	1372869	1373465	BB22OP_04292	VPA1360
IG47	12	Incompatibility	group_7075	Accessory	type III secretion system lipoprotein EprK	{NA}	{NA}	CP003973.1	1377811	1378344	BB22OP_04300	VPA1367
IG47	12	Incompatibility	group_7078	Accessory	Type III secretion protein Spa33	{NA}	{NA}	CP003973.1	1362318	1362533	BB22OP_04280	VPA1349
IG47	12	Incompatibility	group_8268	Accessory	hypothetical protein	{NA}	{NA}	CP003973.1	1363208	1364209	BB22OP_04282	VPA1351
IG47	12	Incompatibility	group_8283	Accessory	Bacterial export proteins, family 3	{NA}	{NA}	JWSS01000002.1	71861	72094	10329_03192
IG47	12	Incompatibility	group_8368	Accessory	hypothetical protein	{NA}	{NA}	JWSS01000002.1	44367	44621	10329_03162
IG47	12	Incompatibility	group_8427	Accessory	hypothetical protein	{NA}	{NA}	CP003973.1	1373533	1374258	BB22OP_04293	VPA1361
IG47	12	Incompatibility	group_8428	Accessory	chaperone	{NA}	{NA}	CP003973.1	1375659	1375949	BB22OP_04295	VPA1363
IG47	12	Incompatibility	group_8429	Accessory	two-component response regulator	{NA}	{NA}	CP003973.1	1376835	1377323	BB22OP_04298	VPA1365
IG47	12	Incompatibility	group_8430	Accessory	hypothetical protein	{NA}	{NA}	CP003973.1	1377351	1377809	BB22OP_04299	VPA1366
IG47	12	Incompatibility	group_8431	Accessory	WH2 motif protein	{NA}	{NA}	CP003973.1	1379687	1381141	BB22OP_04303	VPA1370
IG47	12	Incompatibility	group_8434	Accessory	hypothetical protein	{NA}	{NA}	CP003973.1	1350630	1351004	BB22OP_04265	VPA1334
IG47	12	Incompatibility	group_8435	Accessory	hypothetical protein	{NA}	{NA}	CP003973.1	1351978	1352388	BB22OP_04268	VPA1337
IG47	12	Incompatibility	group_8436	Accessory	Spa29%2C component of the Mxi-Spa secretion machinery	{NA}	{NA}	CP003973.1	1355295	1355978	BB22OP_04272	VPA1341
IG47	12	Incompatibility	group_8437	Accessory	hypothetical protein	{NA}	{NA}	CP003973.1	1364196	1364588	BB22OP_04283	VPA1352
IG47	12	Incompatibility	group_8438	Accessory	outer membrane protein	{NA}	{NA}	CP003973.1	1364578	1365384	BB22OP_04284	VPA1353
IG47	12	Incompatibility	group_860	Accessory	hypothetical protein	{NA}	{NA}	JWSS01000002.1	85518	86381	10329_03203
IG47	12	Incompatibility	group_887	Accessory	hypothetical protein	{NA}	{NA}	JWSS01000002.1	39951	40640	10329_03158
IG47	12	Incompatibility	group_991	Accessory	putative inner membrane transporter YedA	{COG0697 Permeases of the drug/metabolite transporter (DMT) superfamily GER Carbohydrate transport and metabolism ; Amino acid transport and metabolism ; General function prediction only ;}	{NA}	JWSS01000002.1	77688	78593	10329_03199
IG47	12	Incompatibility	hilA	Accessory	transcriptional activator ToxR	{NA}	{NA}	CP003973.1	1361482	1362033	BB22OP_04279	VPA1348
IG47	12	Incompatibility	hlyD_2	Accessory	Hemolysin secretion protein D, chromosomal	{NA}	{NA}	JWSS01000002.1	111954	112391	10329_03231
IG47	12	Incompatibility	hrcN	Accessory	ATPase YscN	{NA}	{VPA1338 K03224 3.6.3.14 vpa03070 Type III secretion system - Vibrio parahaemolyticus Genetic Information Processing; Folding, Sorting and Degradation}	CP003973.1	1352333	1353595	BB22OP_04269	VPA1338
IG47	12	Incompatibility	kce_2	Accessory	3-keto-5-aminohexanoate cleavage enzyme	{NA}	{NA}	JWSS01000002.1	114684	115103	10329_03236
IG47	12	Incompatibility	kcsA_1	Accessory	integral membrane protein	{NA}	{NA}	CP003973.1	1395609	1395938	BB22OP_04313	VPA1382
IG47	12	Incompatibility	kcsA_2	Accessory	hypothetical protein	{NA}	{NA}	CP003973.1	1395974	1396237	BB22OP_04314	VPA1383
IG47	12	Incompatibility	oppB_4	Accessory	Oligopeptide transport system permease protein OppB	{NA}	{NA}	JWSS01000002.1	91942	92922	10329_03210
IG47	12	Incompatibility	spiA_1	Accessory	Type III secretion system outer membrane protein SpiA precursor	{NA}	{VPA1339 K03219 vpa03070 Type III secretion system - Vibrio parahaemolyticus Genetic Information Processing; Folding, Sorting and Degradation}	JWSS01000002.1	68016	69482	10329_03187
IG47	12	Incompatibility	spiA_2	Accessory	type III secretion system EscC protein	{NA}	{VPA1339 K03219 vpa03070 Type III secretion system - Vibrio parahaemolyticus Genetic Information Processing; Folding, Sorting and Degradation}	CP003973.1	1353595	1355064	BB22OP_04270	VPA1339
IG47	12	Incompatibility	ssaV	Accessory	type III secretion system EscV protein	{NA}	{VPA1355 K03230 vpa03070 Type III secretion system - Vibrio parahaemolyticus Genetic Information Processing; Folding, Sorting and Degradation}	CP003973.1	1366435	1368318	BB22OP_04286	VPA1355
IG47	12	Incompatibility	stpA	Accessory	DNA-binding protein StpA	{COG2916 DNA-binding protein H-NS R General function prediction only ;}	{NA}	JWSS01000002.1	84859	85263	10329_03202
IG47	12	Incompatibility	tdh2	Accessory	Thermostable direct hemolysin 2 precursor	{NA}	{NA}	JWSS01000002.1	87821	88390	10329_03205
IG47	12	Incompatibility	tdh3	Accessory	thermostable direct hemolysin A	{NA}	{NA}	JWSS01000002.1	102463	103032	10329_03221	VPA1314
IG47	12	Incompatibility	tnsB	Accessory	transposase	{NA}	{NA}	CP003973.1	1405692	1407566	BB22OP_04325	VPA1395
IG47	12	Incompatibility	ureA	Accessory	Urease subunit gamma	{COG0831 Urea amidohydrolase (urease) gamma subunit E Amino acid transport and metabolism ;}	{PMI3683 ureA K01430 3.5.1.5 pmr00791 Atrazine degradation - Proteus mirabilis Metabolism; Xenobiotics Biodegradation and Metabolism}	JWSS01000002.1	95705	96007	10329_03213
IG47	12	Incompatibility	ureB	Accessory	Urease subunit beta	{COG0832 Urea amidohydrolase (urease) beta subunit E Amino acid transport and metabolism ;}	{PMI3684 ureB K01429 3.5.1.5 pmr00791 Atrazine degradation - Proteus mirabilis Metabolism; Xenobiotics Biodegradation and Metabolism}	JWSS01000002.1	96018	96341	10329_03214
IG47	12	Incompatibility	ureC	Accessory	Urease subunit alpha	{COG0804 Urea amidohydrolase (urease) alpha subunit E Amino acid transport and metabolism ;}	{VF_0673 ureC K01428 3.5.1.5 vfi00791 Atrazine degradation - Vibrio fischeri Metabolism; Xenobiotics Biodegradation and Metabolism}	JWSS01000002.1	97033	98040	10329_03216
IG47	12	Incompatibility	ureD	Accessory	Urease accessory protein UreD	{COG0829 Urease accessory protein UreH O Posttranslational modification, protein turnover, chaperones ;}	{NA}	JWSS01000002.1	94845	95687	10329_03212
IG47	12	Incompatibility	ureE	Accessory	Urease accessory protein UreE	{COG2371 Urease accessory protein UreE O Posttranslational modification, protein turnover, chaperones ;}	{NA}	JWSS01000002.1	98095	98574	10329_03217
IG47	12	Incompatibility	ureF	Accessory	Urease accessory protein UreG	{COG0378 Ni2+-binding GTPase involved in regulation of expression and maturation of urease and hydrogenase OK Posttranslational modification, protein turnover, chaperones ; Transcription ;}	{NA}	JWSS01000002.1	99276	99914	10329_03219
IG47	12	Incompatibility	vspR	Accessory	Transcriptional regulator VspR	{NA}	{NA}	JWSS01000002.1	19127	19522	10329_03135	VPA1392
IG47	12	Incompatibility	yjcC_2	Accessory	putative membrane protein YjcC	{COG2200 FOG: EAL domain T Signal transduction mechanisms ;}	{NA}	JWSS01000002.1	36811	37515	10329_03154
IG47	12	Incompatibility	yopJ	Accessory	Effector protein YopJ	{NA}	{NA}	JWSS01000002.1	40703	41575	10329_03159
IG47	12	Incompatibility	yscU_1	Accessory	hypothetical protein	{NA}	{NA}	JWSS01000002.1	61653	62045	10329_03178
IG47	12	Incompatibility	yscU_2	Accessory	type III secretion system EscU protein	{NA}	{NA}	CP003973.1	1365359	1366414	BB22OP_04285	VPA1354
IG46	12	Compatibility	group_2090	Accessory	hypothetical protein	{NA}	{NA}	LKQS01000008.1	826	2043	CFSAN029654_00393
IG46	12	Compatibility	group_2595	Accessory	hypothetical protein	{NA}	{NA}	CP006005.1	639445	639633	FDA_R31_03721
IG46	12	Compatibility	group_2730	Accessory	hypothetical protein	{NA}	{NA}	CP006005.1	637891	639114	FDA_R31_03719
IG46	12	Compatibility	group_3161	Accessory	hypothetical protein	{NA}	{NA}	CP006005.1	639164	639448	FDA_R31_03720
IG45	12	Compatibility	group_2158	Accessory	hypothetical protein	{COG1765 Predicted redox protein, regulator of disulfide bond formation O Posttranslational modification, protein turnover, chaperones ;}	{NA}	CP014047.1	1238239	1238634	ATCC-17802_04125
IG45	12	Compatibility	group_4820	Accessory	hypothetical protein	{NA}	{NA}	CP014047.1	1242599	1243702	ATCC-17802_04130
IG45	12	Compatibility	group_8661	Accessory	hypothetical protein	{NA}	{NA}	CP014047.1	1238738	1239304	ATCC-17802_04126
IG87	11	Compatibility	group_518	Accessory	hypothetical protein	{NA}	{NA}	NC_004603.1	383963	384502	VP0383	VP0383
IG87	11	Compatibility	group_832	Accessory	hypothetical protein	{NA}	{NA}	NC_004603.1	382876	383667	VP0382	VP0382
IG85	11	Compatibility	group_3329	Accessory	hypothetical protein	{NA}	{NA}	LFWJ01000026.1	186413	186541	S195-7_00545
IG66	11	Compatibility	ddlB	Accessory	D-alanine--D-alanine ligase B	{NA}	{NA}	Scaffold34	16790	17944	F9_2_04163
IG66	11	Compatibility	group_11856	Accessory	Bacterial extracellular solute-binding proteins, family 3	{NA}	{NA}	Scaffold34	21279	21974	F9_2_04166
IG66	11	Compatibility	group_11857	Accessory	ABC transporter substrate binding protein	{NA}	{NA}	Scaffold34	20146	21276	F9_2_04165
IG66	11	Compatibility	group_11860	Accessory	Chaperone protein ClpB 1	{COG0542 ATPases with chaperone activity, ATP-binding subunit O Posttranslational modification, protein turnover, chaperones ;}	{NA}	Scaffold34	14042	16648	F9_2_04162
IG66	11	Compatibility	group_11861	Accessory	hypothetical protein	{NA}	{NA}	Scaffold34	13050	14033	F9_2_04161
IG66	11	Compatibility	group_11862	Accessory	Gene 25-like lysozyme	{NA}	{NA}	Scaffold34	10860	11276	F9_2_04159
IG66	11	Compatibility	group_18567	Accessory	hypothetical protein	{NA}	{NA}	Scaffold34	30002	31891	F9_2_04173
IG66	11	Compatibility	group_18568	Accessory	Intracellular multiplication and human macrophage-killing	{NA}	{NA}	Scaffold34	25893	29345	F9_2_04171
IG66	11	Compatibility	group_18569	Accessory	hypothetical protein	{NA}	{NA}	Scaffold34	24749	25891	F9_2_04170
IG66	11	Compatibility	group_18570	Accessory	hypothetical protein	{NA}	{NA}	Scaffold34	23458	24741	F9_2_04169
IG66	11	Compatibility	group_18571	Accessory	hypothetical protein	{NA}	{NA}	Scaffold34	9508	10863	F9_2_04158
IG66	11	Compatibility	group_18572	Accessory	hypothetical protein	{COG3517 Uncharacterized protein conserved in bacteria S Function unknown ;}	{NA}	Scaffold34	7982	9460	F9_2_04157
IG66	11	Compatibility	group_18573	Accessory	hypothetical protein	{COG3516 Uncharacterized protein conserved in bacteria S Function unknown ;}	{NA}	Scaffold34	7473	7982	F9_2_04156
IG66	11	Compatibility	group_18574	Accessory	hypothetical protein	{NA}	{NA}	Scaffold34	6873	7403	F9_2_04155
IG66	11	Compatibility	group_18575	Accessory	hypothetical protein	{NA}	{NA}	Scaffold34	2301	2864	F9_2_04152
IG66	11	Compatibility	group_18576	Accessory	PAAR motif protein	{COG4104 Uncharacterized conserved protein S Function unknown ;}	{NA}	Scaffold34	1995	2291	F9_2_04151
IG66	11	Compatibility	group_19981	Accessory	Type VI secretion lipoprotein	{NA}	{NA}	Scaffold34	22955	23422	F9_2_04168
IG66	11	Compatibility	group_34206	Accessory	hypothetical protein	{NA}	{NA}	Scaffold34	11269	13068	F9_2_04160
IG66	11	Compatibility	group_7497	Accessory	FHA domain protein	{NA}	{NA}	Scaffold34	22008	22955	F9_2_04167
IG66	11	Compatibility	group_7498	Accessory	Phage-related baseplate assembly protein	{NA}	{NA}	Scaffold34	2864	4855	F9_2_04153
IG66	11	Compatibility	group_9074	Accessory	hypothetical protein	{NA}	{NA}	Scaffold34	34644	35123	F9_2_04177
IG66	11	Compatibility	group_9075	Accessory	hypothetical protein	{NA}	{NA}	Scaffold34	5455	6846	F9_2_04154
IG66	11	Compatibility	spkD	Accessory	Serine/threonine-protein kinase D	{NA}	{NA}	Scaffold34	29354	29986	F9_2_04172
IG66	11	Compatibility	ymfD	Accessory	Bacillibactin exporter	{NA}	{NA}	Scaffold34	17954	20149	F9_2_04164
IG65	11	Compatibility	group_6636	Accessory	hypothetical protein	{NA}	{NA}	Scaffold16	74185	74943	C4_8_04207
IG65	11	Compatibility	group_9547	Accessory	hypothetical protein	{NA}	{NA}	Scaffold16	67629	68036	C4_8_04203
IG64	11	Compatibility	group_10495	Accessory	hypothetical protein	{NA}	{NA}	S143_3215	27667	28497	S143_03094
IG64	11	Compatibility	group_12472	Accessory	hypothetical protein	{NA}	{NA}	S143_3215	26950	27606	S143_03093
IG64	11	Compatibility	group_12473	Accessory	hypothetical protein	{NA}	{NA}	S143_3215	39244	39996	S143_03102
IG64	11	Compatibility	group_12474	Accessory	hypothetical protein	{NA}	{NA}	S143_3215	48677	49309	S143_03113
IG64	11	Compatibility	group_19990	Accessory	hypothetical protein	{NA}	{NA}	S143_3215	32618	33253	S143_03098
IG64	11	Compatibility	group_3166	Accessory	ATP-dependent RNA helicase SrmB	{NA}	{NA}	S143_3215	53372	55720	S143_03115
IG64	11	Compatibility	group_3930	Accessory	AAA-like domain protein	{NA}	{NA}	S143_3215	29624	32608	S143_03097
IG64	11	Compatibility	group_4218	Accessory	Chromosome partition protein Smc	{NA}	{NA}	S143_3215	49312	53013	S143_03114
IG64	11	Compatibility	group_5379	Accessory	GTPase Der	{NA}	{NA}	S143_3215	42694	43800	S143_03107
IG64	11	Compatibility	group_5900	Accessory	hypothetical protein	{NA}	{NA}	S143_3215	45042	45236	S143_03108
IG64	11	Compatibility	group_5901	Accessory	hypothetical protein	{NA}	{NA}	S143_3215	47436	48677	S143_03112
IG64	11	Compatibility	group_6601	Accessory	Helix-turn-helix domain of resolvase	{NA}	{NA}	S143_3215	41121	41501	S143_03105
IG64	11	Compatibility	group_6602	Accessory	hypothetical protein	{NA}	{NA}	S143_3215	33263	36028	S143_03099
IG64	11	Compatibility	group_7684	Accessory	GTP-binding protein Der	{NA}	{NA}	S143_3215	41609	42694	S143_03106
IG64	11	Compatibility	group_7685	Accessory	hypothetical protein	{NA}	{NA}	S143_3215	45738	46574	S143_03110
IG64	11	Compatibility	group_7686	Accessory	hypothetical protein	{NA}	{NA}	S143_3215	46571	47443	S143_03111
IG64	11	Compatibility	group_7688	Accessory	hypothetical protein	{NA}	{NA}	S143_3215	36164	37159	S143_03100
IG64	11	Compatibility	group_9407	Accessory	hypothetical protein	{NA}	{NA}	S143_3215	28503	28967	S143_03095
IG64	11	Compatibility	group_9408	Accessory	hypothetical protein	{NA}	{NA}	S143_3215	28968	29618	S143_03096
IG64	11	Compatibility	yfiN_5	Accessory	putative diguanylate cyclase YfiN	{NA}	{NA}	S143_3215	38038	38691	S143_03101
IG63	11	Compatibility	group_10591	Accessory	Putative prophage CPS-53 integrase	{NA}	{NA}	Scaffold3	301268	302485	D4_5_01794
IG63	11	Compatibility	group_11417	Accessory	hypothetical protein	{NA}	{NA}	Scaffold3	315808	316197	D4_5_01808
IG63	11	Compatibility	group_11418	Accessory	hypothetical protein	{NA}	{NA}	Scaffold3	315440	315796	D4_5_01807
IG63	11	Compatibility	group_11419	Accessory	hypothetical protein	{NA}	{NA}	Scaffold3	305160	306326	D4_5_01799
IG63	11	Compatibility	group_17384	Accessory	Helix-turn-helix domain protein	{NA}	{NA}	Scaffold3	324774	325022	D4_5_01817
IG63	11	Compatibility	group_3369	Accessory	hypothetical protein	{NA}	{NA}	Scaffold3	308381	308608	D4_5_01803
IG63	11	Compatibility	group_3866	Accessory	hypothetical protein	{NA}	{NA}	Scaffold3	302630	303436	D4_5_01795
IG63	11	Compatibility	group_4466	Accessory	hypothetical protein	{NA}	{NA}	Scaffold3	322509	324620	D4_5_01816
IG63	11	Compatibility	group_5767	Accessory	Prophage CP4-57 regulatory protein (AlpA)	{NA}	{NA}	Scaffold3	325009	325242	D4_5_01818
IG63	11	Compatibility	group_5835	Accessory	hypothetical protein	{NA}	{NA}	Scaffold3	308735	310267	D4_5_01804
IG63	11	Compatibility	group_7346	Accessory	hypothetical protein	{NA}	{NA}	Scaffold3	306329	306706	D4_5_01800
IG63	11	Compatibility	group_8815	Accessory	hypothetical protein	{NA}	{NA}	Scaffold3	322135	322512	D4_5_01815
IG63	11	Compatibility	group_8818	Accessory	hypothetical protein	{NA}	{NA}	Scaffold3	304302	304940	D4_5_01798
IG63	11	Compatibility	group_8819	Accessory	hypothetical protein	{NA}	{NA}	Scaffold3	303926	304312	D4_5_01797
IG63	11	Compatibility	group_9112	Accessory	hypothetical protein	{NA}	{NA}	Scaffold3	306801	307100	D4_5_01801
IG63	11	Compatibility	traD	Accessory	Coupling protein TraD	{NA}	{NA}	Scaffold3	313477	315453	D4_5_01806
IG63	11	Compatibility	traI	Accessory	Multifunctional conjugation protein TraI	{NA}	{NA}	Scaffold3	310367	313480	D4_5_01805
IG62	11	Compatibility	group_17134	Accessory	hypothetical protein	{COG3943 Virulence protein R General function prediction only ;}	{NA}	Scaffold1	738868	739878	A4_9_00678
IG62	11	Compatibility	group_34035	Accessory	Type I restriction enzyme EcoR124II R protein	{COG0610 Type I site-specific restriction-modification system, R (restriction) subunit and related helicases V Defense mechanisms ;}	{NA}	Scaffold1	735645	738863	A4_9_00677
IG62	11	Compatibility	group_3601	Accessory	hypothetical protein	{NA}	{NA}	Scaffold1	757612	759579	A4_9_00697
IG62	11	Compatibility	group_4228	Accessory	hypothetical protein	{NA}	{NA}	Scaffold1	752215	753393	A4_9_00691
IG62	11	Compatibility	group_4447	Accessory	hypothetical protein	{NA}	{NA}	Scaffold1	743943	744704	A4_9_00682
IG62	11	Compatibility	group_4448	Accessory	hypothetical protein	{NA}	{NA}	Scaffold1	743549	743956	A4_9_00681
IG62	11	Compatibility	group_4556	Accessory	hypothetical protein	{NA}	{NA}	Scaffold1	750688	751059	A4_9_00688
IG62	11	Compatibility	group_4834	Accessory	hypothetical protein	{NA}	{NA}	Scaffold1	755055	755783	A4_9_00693
IG62	11	Compatibility	group_5235	Accessory	hypothetical protein	{NA}	{NA}	Scaffold1	755780	756130	A4_9_00694
IG62	11	Compatibility	group_6338	Accessory	hypothetical protein	{NA}	{NA}	Scaffold1	756139	756345	A4_9_00695
IG62	11	Compatibility	group_7282	Accessory	Type I restriction enzyme EcoKI M protein	{COG0286 Type I restriction-modification system methyltransferase subunit V Defense mechanisms ;}	{NA}	Scaffold1	741215	743290	A4_9_00680
IG62	11	Compatibility	traC	Accessory	DNA primase TraC	{NA}	{NA}	Scaffold1	753590	754972	A4_9_00692
IG61	11	Compatibility	group_10449	Accessory	hypothetical protein	{NA}	{NA}	MIQI01000066.1	729828	730274	GCSL_R5_02672
IG61	11	Compatibility	group_11308	Accessory	hypothetical protein	{COG2958 Uncharacterized protein conserved in bacteria S Function unknown ;}	{NA}	MIQI01000066.1	720689	721618	GCSL_R5_02663
IG61	11	Compatibility	group_2102	Accessory	putative type I restriction enzymeP M protein	{COG0286 Type I restriction-modification system methyltransferase subunit V Defense mechanisms ;}	{NA}	MIQI01000066.1	722864	724567	GCSL_R5_02665
IG61	11	Compatibility	group_2639	Accessory	hypothetical protein	{NA}	{NA}	MIQI01000066.1	714583	716673	GCSL_R5_02660
IG61	11	Compatibility	group_3113	Accessory	site-specific tyrosine recombinase XerC	{COG0582 Integrase L Replication, recombination and repair ;}	{NA}	MIQI01000066.1	724677	725273	GCSL_R5_02666
IG61	11	Compatibility	group_4255	Accessory	hypothetical protein	{NA}	{NA}	MIQI01000066.1	713754	714578	GCSL_R5_02659
IG61	11	Compatibility	group_6047	Accessory	hypothetical protein	{NA}	{NA}	MIQI01000066.1	708386	710422	GCSL_R5_02655
IG61	11	Compatibility	group_6348	Accessory	hypothetical protein	{NA}	{NA}	MIQI01000066.1	729616	729831	GCSL_R5_02671
IG61	11	Compatibility	group_6892	Accessory	hypothetical protein	{NA}	{NA}	MIQI01000066.1	730563	731258	GCSL_R5_02673
IG61	11	Compatibility	group_6910	Accessory	Initiator Replication protein	{NA}	{NA}	MIQI01000066.1	711640	713022	GCSL_R5_02657
IG61	11	Compatibility	group_955	Accessory	Type-1 restriction enzyme R protein	{COG0610 Type I site-specific restriction-modification system, R (restriction) subunit and related helicases V Defense mechanisms ;}	{NA}	MIQI01000066.1	717448	720672	GCSL_R5_02662
IG60	11	Compatibility	group_1700	Accessory	hypothetical protein	{NA}	{NA}	Scaffold8	54238	55704	C8_8_01307
IG60	11	Compatibility	group_2928	Accessory	Zona occludens toxin	{NA}	{NA}	Scaffold8	52478	53902	C8_8_01305
IG60	11	Compatibility	group_3356	Accessory	hypothetical protein	{NA}	{NA}	Scaffold8	52188	52466	C8_8_01304
IG60	11	Compatibility	group_4827	Accessory	Replication initiation factor	{NA}	{NA}	Scaffold8	56659	57963	C8_8_01311
IG60	11	Compatibility	group_4828	Accessory	hypothetical protein	{NA}	{NA}	Scaffold8	55838	56056	C8_8_01308
IG60	11	Compatibility	group_5226	Accessory	hypothetical protein	{NA}	{NA}	Scaffold8	57908	58132	C8_8_01312
IG60	11	Compatibility	group_5324	Accessory	Phage related protein	{NA}	{NA}	Scaffold8	58318	58686	C8_8_01313
IG60	11	Compatibility	group_7261	Accessory	CTX phage RstB protein	{NA}	{NA}	Scaffold8	56327	56653	C8_8_01310
IG60	11	Compatibility	group_7262	Accessory	hypothetical protein	{NA}	{NA}	Scaffold8	53906	54238	C8_8_01306
IG60	11	Compatibility	group_8694	Accessory	hypothetical protein	{NA}	{NA}	Scaffold8	56085	56330	C8_8_01309
IG59	11	Compatibility	group_1153	Accessory	hypothetical protein	{NA}	{NA}	14-1498-F-VP_8	34627	35343	14-1498-F-VP_01407
IG59	11	Compatibility	group_1943	Accessory	bacteriophage f237 ORF2	{NA}	{NA}	14-1498-F-VP_8	28315	28674	14-1498-F-VP_01399	VP1552
IG59	11	Compatibility	group_2078	Accessory	hypothetical protein	{NA}	{NA}	14-1498-F-VP_8	26964	27179	14-1498-F-VP_01397	VP1550
IG59	11	Compatibility	group_2396	Accessory	hypothetical protein	{NA}	{NA}	14-1498-F-VP_8	32578	32721	14-1498-F-VP_01405	VP1559
IG59	11	Compatibility	group_319	Accessory	bacteriophage f237 ORF6	{NA}	{NA}	14-1498-F-VP_8	30844	31188	14-1498-F-VP_01403	VP1557
IG59	11	Compatibility	group_3563	Accessory	bacteriophage f237 ORF4	{NA}	{NA}	14-1498-F-VP_8	28914	29159	14-1498-F-VP_01401	VP1554
IG59	11	Compatibility	group_38	Accessory	bacteriophage f237 ORF9	{NA}	{NA}	14-1498-F-VP_8	35372	35737	14-1498-F-VP_01408	VP1562
IG59	11	Compatibility	group_609	Accessory	bacteriophage f237 ORF10	{NA}	{NA}	14-1498-F-VP_8	26439	26807	14-1498-F-VP_01396	VP1549
IG59	11	Compatibility	group_833	Accessory	bacteriophage f237 ORF1	{NA}	{NA}	14-1498-F-VP_8	27163	28311	14-1498-F-VP_01398	VP1551
IG59	11	Compatibility	zot	Accessory	bacteriophage f237 ORF7	{NA}	{NA}	14-1498-F-VP_8	31193	32578	14-1498-F-VP_01404	VP1558
IG58	11	Compatibility	group_11124	Accessory	hypothetical protein	{NA}	{NA}	NC_021822.1	654677	655243	CDC_K4557_03643
IG58	11	Compatibility	group_16811	Accessory	hypothetical protein	{NA}	{NA}	NC_021822.1	649553	650332	CDC_K4557_03640
IG58	11	Compatibility	group_4803	Accessory	hypothetical protein	{NA}	{NA}	NC_021822.1	650336	653275	CDC_K4557_03641
IG58	11	Compatibility	group_5198	Accessory	recombination protein F	{NA}	{NA}	NC_021822.1	661885	663045	CDC_K4557_03647
IG58	11	Compatibility	group_5688	Accessory	5-methylcytosine-specific restriction enzyme subunit McrC	{NA}	{NA}	NC_021822.1	669332	670633	CDC_K4557_03652
IG58	11	Compatibility	group_6303	Accessory	hypothetical protein	{NA}	{NA}	NC_021822.1	653268	654680	CDC_K4557_03642
IG58	11	Compatibility	hsdM	Accessory	Type I restriction enzyme EcoKI M protein	{COG0286 Type I restriction-modification system methyltransferase subunit V Defense mechanisms ;}	{NA}	NC_021822.1	658914	660404	CDC_K4557_03645
IG58	11	Compatibility	hsdR_2	Accessory	Type-1 restriction enzyme R protein	{COG4096 Type I site-specific restriction-modification system, R (restriction) subunit and related helicases V Defense mechanisms ;}	{NA}	NC_021822.1	655386	658883	CDC_K4557_03644
IG58	11	Compatibility	intA_3	Accessory	Prophage CP4-57 integrase	{COG0582 Integrase L Replication, recombination and repair ;}	{NA}	NC_021822.1	670779	671999	CDC_K4557_03653
IG58	11	Compatibility	mcrB	Accessory	5-methylcytosine-specific restriction enzyme B	{NA}	{NA}	NC_021822.1	666636	669332	CDC_K4557_03651
IG57	11	Compatibility	ftsH_1	Accessory	ATP-dependent zinc metalloprotease FtsH	{NA}	{NA}	MIRY01000041.1	29984	32131	GCSL_R108_02394
IG57	11	Compatibility	group_12217	Accessory	hypothetical protein	{NA}	{NA}	MIRY01000041.1	34452	35180	GCSL_R108_02397
IG57	11	Compatibility	group_12218	Accessory	hypothetical protein	{NA}	{NA}	MIRY01000041.1	28410	29981	GCSL_R108_02393
IG57	11	Compatibility	group_14859	Accessory	hypothetical protein	{NA}	{NA}	MIRY01000041.1	33863	34459	GCSL_R108_02396
IG57	11	Compatibility	group_19341	Accessory	von Willebrand factor type A domain protein	{NA}	{NA}	MIRY01000041.1	27699	28400	GCSL_R108_02392
IG57	11	Compatibility	group_4938	Accessory	hypothetical protein	{NA}	{NA}	MIRY01000041.1	42278	45091	GCSL_R108_02401
IG57	11	Compatibility	group_7606	Accessory	RNA chaperone/anti-terminator	{NA}	{NA}	MIRY01000041.1	45098	49294	GCSL_R108_02402
IG57	11	Compatibility	group_7607	Accessory	hypothetical protein	{NA}	{NA}	MIRY01000041.1	32128	33870	GCSL_R108_02395
IG57	11	Compatibility	pkn5	Accessory	Serine/threonine-protein kinase pkn5	{NA}	{NA}	MIRY01000041.1	35177	36673	GCSL_R108_02398
IG56	11	Compatibility	group_4116	Accessory	ComEC family competence protein	{NA}	{NA}	MIQX01000073.1	52633	53724	GCSL_R33_03158
IG56	11	Compatibility	group_4429	Accessory	putative type I restriction enzymeP M protein	{COG0286 Type I restriction-modification system methyltransferase subunit V Defense mechanisms ;}	{NA}	MIQX01000073.1	41533	43113	GCSL_R33_03150
IG56	11	Compatibility	group_5680	Accessory	hypothetical protein	{NA}	{NA}	MIQX01000073.1	45888	46787	GCSL_R33_03153
IG56	11	Compatibility	group_5681	Accessory	Transcriptional regulatory protein ZraR	{NA}	{NA}	MIQX01000073.1	36450	37934	GCSL_R33_03148
IG56	11	Compatibility	group_8589	Accessory	5'-nucleotidase	{NA}	{Mmwyl1_2729 K01081 3.1.3.5 mmw00760 Nicotinate and nicotinamide metabolism - Marinomonas sp. MWYL1 Metabolism; Metabolism of Cofactors and Vitamins}	MIQX01000073.1	46929	47888	GCSL_R33_03154
IG56	11	Compatibility	hsdR_1	Accessory	Type-1 restriction enzyme R protein	{NA}	{NA}	MIQX01000073.1	37997	41446	GCSL_R33_03149
IG55	11	Compatibility	bin3_2	Accessory	hypothetical protein	{COG1961 Site-specific recombinases, DNA invertase Pin homologs L Replication, recombination and repair ;}	{NA}	CP013250.1	7262	7771	FORC_022_04842
IG55	11	Compatibility	group_1325	Accessory	TraM recognition site of TraD and TraG	{NA}	{NA}	CP013250.1	59497	61458	FORC_022_04897
IG55	11	Compatibility	group_1611	Accessory	hypothetical protein	{NA}	{NA}	CP013250.1	75136	76281	FORC_022_04916
IG55	11	Compatibility	group_1722	Accessory	hypothetical protein	{NA}	{NA}	CP013250.1	71875	72879	FORC_022_04913
IG55	11	Compatibility	group_19704	Accessory	hypothetical protein	{NA}	{NA}	CP013250.1	81905	82102	FORC_022_04923
IG55	11	Compatibility	group_20238	Accessory	hypothetical protein	{NA}	{NA}	JPKT01000038.1	21350	21523	NCKU_TV_5HP_04810
IG55	11	Compatibility	group_2125	Accessory	Initiator Replication protein	{NA}	{NA}	CP013250.1	20533	21609	FORC_022_04857
IG55	11	Compatibility	group_21342	Accessory	hypothetical protein	{NA}	{NA}	CP013250.1	92431	92622	FORC_022_04935
IG55	11	Compatibility	group_2288	Accessory	TrbL/VirB6 plasmid conjugal transfer protein	{NA}	{NA}	CP013250.1	82113	83426	FORC_022_04924
IG55	11	Compatibility	group_2289	Accessory	hypothetical protein	{NA}	{NA}	CP013250.1	58927	59466	FORC_022_04896
IG55	11	Compatibility	group_2435	Accessory	hypothetical protein	{NA}	{NA}	CP013250.1	64761	65342	FORC_022_04902
IG55	11	Compatibility	group_2436	Accessory	Trypsin	{NA}	{NA}	CP013250.1	68212	69252	FORC_022_04908
IG55	11	Compatibility	group_2437	Accessory	hypothetical protein	{NA}	{NA}	CP013250.1	77783	78640	FORC_022_04918
IG55	11	Compatibility	group_2461	Accessory	hypothetical protein	{NA}	{NA}	JPKT01000065.1	16	432	NCKU_TV_5HP_05110
IG55	11	Compatibility	group_2619	Accessory	hypothetical protein	{NA}	{NA}	CP013250.1	63649	64353	FORC_022_04900
IG55	11	Compatibility	group_2635	Accessory	Bacterial Ig-like domain (group 2)	{NA}	{NA}	CP013250.1	802	3942	FORC_022_04838
IG55	11	Compatibility	group_3134	Accessory	hypothetical protein	{NA}	{NA}	CP013250.1	84381	85139	FORC_022_04926
IG55	11	Compatibility	group_3135	Accessory	hypothetical protein	{NA}	{NA}	CP013250.1	53076	53417	FORC_022_04889
IG55	11	Compatibility	group_3347	Accessory	Outer membrane protein A precursor	{NA}	{NA}	CP013249.1	740660	741760	FORC_022_03827
IG55	11	Compatibility	group_3382	Accessory	Type IV secretion system protein VirB11	{NA}	{NA}	CP013250.1	83423	84370	FORC_022_04925
IG55	11	Compatibility	group_3385	Accessory	hypothetical protein	{NA}	{NA}	CP013250.1	74495	75139	FORC_022_04915
IG55	11	Compatibility	group_3386	Accessory	hypothetical protein	{NA}	{NA}	CP013250.1	76281	77783	FORC_022_04917
IG55	11	Compatibility	group_3662	Accessory	Calcineurin-like phosphoesterase	{NA}	{NA}	CP013250.1	96542	98122	FORC_022_04939
IG55	11	Compatibility	group_3664	Accessory	Bacterial Ig-like domain (group 2)	{NA}	{NA}	CP013250.1	10333	12282	FORC_022_04844
IG55	11	Compatibility	group_3889	Accessory	hypothetical protein	{NA}	{NA}	CP013250.1	58190	58930	FORC_022_04895
IG55	11	Compatibility	group_4173	Accessory	VirB8 protein	{NA}	{NA}	CP013250.1	81221	81895	FORC_022_04922
IG55	11	Compatibility	group_4177	Accessory	hypothetical protein	{NA}	{NA}	CP013250.1	79906	80328	FORC_022_04920
IG55	11	Compatibility	group_4222	Accessory	Peptidase S26	{NA}	{NA}	CP013250.1	65936	66442	FORC_022_04904
IG55	11	Compatibility	group_4487	Accessory	hypothetical protein	{NA}	{NA}	CP013250.1	54097	54489	FORC_022_04891
IG55	11	Compatibility	group_4490	Accessory	hypothetical protein	{NA}	{NA}	CP013250.1	67799	68068	FORC_022_04907
IG55	11	Compatibility	group_4493	Accessory	hypothetical protein	{NA}	{NA}	CP013250.1	70750	71277	FORC_022_04911
IG55	11	Compatibility	group_4544	Accessory	hypothetical protein	{NA}	{NA}	CP013250.1	69362	69778	FORC_022_04909
IG55	11	Compatibility	group_4547	Accessory	hypothetical protein	{NA}	{NA}	CP013250.1	13006	13182	FORC_022_04846
IG55	11	Compatibility	group_5284	Accessory	hypothetical protein	{NA}	{NA}	CP013250.1	88298	88450	FORC_022_04930
IG55	11	Compatibility	group_5285	Accessory	small toxic polypeptide	{NA}	{NA}	CP013250.1	67326	67532	FORC_022_04906
IG55	11	Compatibility	group_5374	Accessory	hypothetical protein	{NA}	{NA}	CP013250.1	64355	64645	FORC_022_04901
IG55	11	Compatibility	group_5805	Accessory	DNA primase TraC	{NA}	{NA}	CP013250.1	52101	53006	FORC_022_04888
IG55	11	Compatibility	group_6278	Accessory	hypothetical protein	{NA}	{NA}	CP013249.1	746143	746352	FORC_022_03833
IG55	11	Compatibility	group_6442	Accessory	TrbC/VIRB2 family protein	{NA}	{PBPRB1598 K03197 ppr03080 Type IV secretion system - Photobacterium profundum Genetic Information Processing; Folding, Sorting and Degradation}	CP013250.1	87917	88246	FORC_022_04929
IG55	11	Compatibility	group_6615	Accessory	hypothetical protein	{NA}	{NA}	CP013250.1	16446	16622	FORC_022_04851
IG55	11	Compatibility	group_6617	Accessory	Transposon Tn3 resolvase	{COG1961 Site-specific recombinases, DNA invertase Pin homologs L Replication, recombination and repair ;}	{NA}	JPKT01000038.1	20301	20642	NCKU_TV_5HP_04809
IG55	11	Compatibility	group_6683	Accessory	hypothetical protein	{NA}	{NA}	CP013250.1	71277	71861	FORC_022_04912
IG55	11	Compatibility	group_7442	Accessory	Type IV secretory pathway, VirB3-like protein	{NA}	{PBPRB1599 K03198 ppr03080 Type IV secretion system - Photobacterium profundum Genetic Information Processing; Folding, Sorting and Degradation}	CP013250.1	87592	87906	FORC_022_04928
IG55	11	Compatibility	group_7657	Accessory	hypothetical protein	{NA}	{NA}	JPKT01000038.1	18526	19047	NCKU_TV_5HP_04807
IG55	11	Compatibility	group_7723	Accessory	hypothetical protein	{NA}	{NA}	JPKT01000035.1	10379	10600	NCKU_TV_5HP_04738
IG55	11	Compatibility	group_7837	Accessory	hypothetical protein	{NA}	{NA}	JPKT01000038.1	17735	18004	NCKU_TV_5HP_04806
IG55	11	Compatibility	group_8504	Accessory	Tyrosine recombinase XerD	{NA}	{NA}	CP013250.1	25480	26205	FORC_022_04862
IG55	11	Compatibility	group_851	Accessory	hypothetical protein	{NA}	{NA}	CP013250.1	69794	70753	FORC_022_04910
IG55	11	Compatibility	group_9342	Accessory	hypothetical protein	{NA}	{NA}	CP013250.1	90164	91063	FORC_022_04932
IG55	11	Compatibility	group_9466	Accessory	Helix-turn-helix domain of resolvase	{NA}	{NA}	CP013250.1	12575	13009	FORC_022_04845
IG55	11	Compatibility	group_9467	Accessory	Outer membrane protein P5 precursor	{NA}	{NA}	CP013250.1	14402	15334	FORC_022_04848
IG55	11	Compatibility	group_9468	Accessory	global DNA-binding transcriptional dual regulator Fis	{NA}	{NA}	CP013250.1	15416	15664	FORC_022_04849
IG55	11	Compatibility	group_9672	Accessory	hypothetical protein	{NA}	{NA}	CP013250.1	15740	16039	FORC_022_04850
IG55	11	Compatibility	gspE	Accessory	Putative type II secretion system protein E	{NA}	{NA}	CP013250.1	72876	74498	FORC_022_04914
IG55	11	Compatibility	hin_2	Accessory	DNA-invertase hin	{NA}	{NA}	CP013250.1	26038	26568	FORC_022_04863
IG55	11	Compatibility	hns_2	Accessory	global DNA-binding transcriptional dual regulator H-NS	{NA}	{NA}	CP013250.1	62452	62859	FORC_022_04898
IG55	11	Compatibility	klcA	Accessory	Antirestriction protein KlcA	{NA}	{NA}	CP013250.1	53578	53991	FORC_022_04890
IG55	11	Compatibility	mazE	Accessory	Antitoxin MazE	{COG2336 Growth regulator T Signal transduction mechanisms ;}	{NA}	CP013250.1	24799	25029	FORC_022_04861
IG55	11	Compatibility	mazF	Accessory	mRNA interferase MazF	{COG2337 Growth inhibitor T Signal transduction mechanisms ;}	{NA}	CP013250.1	24461	24802	FORC_022_04860
IG55	11	Compatibility	mepM_5	Accessory	Murein DD-endopeptidase MepM	{NA}	{NA}	CP013250.1	16961	17521	FORC_022_04852
IG55	11	Compatibility	ompA_8	Accessory	Outer membrane protein A precursor	{NA}	{NA}	CP013250.1	48969	49667	FORC_022_04883
IG55	11	Compatibility	parA_2	Accessory	Plasmid partition protein A	{NA}	{NA}	CP013250.1	94675	95745	FORC_022_04937
IG55	11	Compatibility	ptlG	Accessory	Type IV secretion system protein virB10	{NA}	{NA}	CP013250.1	78657	79913	FORC_022_04919
IG55	11	Compatibility	topB_2	Accessory	DNA topoisomerase 3	{NA}	{NA}	CP013250.1	55913	58123	FORC_022_04894
IG55	11	Compatibility	virB1	Accessory	Type IV secretion system protein virB1	{NA}	{PBPRB1621 K03194 ppr03080 Type IV secretion system - Photobacterium profundum Genetic Information Processing; Folding, Sorting and Degradation}	CP013250.1	65407	65922	FORC_022_04903
IG55	11	Compatibility	virB4	Accessory	Type IV secretion system protein virB4	{NA}	{NA}	CP013250.1	85136	87550	FORC_022_04927
IG55	11	Compatibility	virB9	Accessory	Type IV secretion system protein virB9 precursor	{NA}	{NA}	CP013250.1	80328	81212	FORC_022_04921
IG54	11	Compatibility	cas9	Accessory	HNH endonuclease	{NA}	{NA}	CP012950.1	1388111	1389109	FORC_023_01290
IG54	11	Compatibility	group_4450	Accessory	Helix-turn-helix domain protein	{NA}	{NA}	CP012950.1	1384769	1385011	FORC_023_01286
IG54	11	Compatibility	group_5457	Accessory	Mg-protoporphyrin IX methyl transferase	{COG0500 SAM-dependent methyltransferases QR Secondary metabolites biosynthesis, transport and catabolism ; General function prediction only ;}	{NA}	CP012950.1	1387536	1388114	FORC_023_01289
IG54	11	Compatibility	group_843	Accessory	Virulence-associated protein E	{NA}	{NA}	CP012950.1	1385004	1386254	FORC_023_01287
IG54	11	Compatibility	xerD_3	Accessory	Tyrosine recombinase XerD	{NA}	{NA}	CP012950.1	1382379	1383563	FORC_023_01284
IG53	11	Incompatibility	cdhR_3	Accessory	transcriptional regulator	{NA}	{NA}	NC_004603.1	2088366	2089280	VP1993	VP1993
IG53	11	Incompatibility	eamB_1	Accessory	Cysteine/O-acetylserine efflux protein	{COG1280 Putative threonine efflux protein E Amino acid transport and metabolism ;}	{NA}	Scaffold112	570	1154	D4_1_02622
IG53	11	Incompatibility	group_4494	Accessory	HTH-type transcriptional regulator YofA	{NA}	{NA}	Scaffold112	1360	2166	D4_1_02623
IG53	11	Incompatibility	yecD	Accessory	isochorismatase-like protein	{NA}	{NA}	NC_004603.1	2089391	2089915	VP1994	VP1994
IG52	11	Incompatibility	dpnA	Accessory	haemagglutinin associated protein	{COG0863 DNA modification methylase L Replication, recombination and repair ;}	{NA}	NC_004603.1	392721	393386	VP0394	VP0394
IG52	11	Incompatibility	group_11071	Accessory	Antitoxin HipB	{NA}	{NA}	Scaffold4	67397	67636	D9_4_01587
IG52	11	Incompatibility	group_1233	Accessory	transmembrane protein	{NA}	{NA}	NC_004603.1	398559	399374	VP0400	VP0400
IG52	11	Incompatibility	group_1479	Accessory	inner membrane protein	{NA}	{NA}	NC_004603.1	386475	387212	VP0386	VP0386
IG52	11	Incompatibility	group_1580	Accessory	hypothetical protein	{NA}	{NA}	NC_004603.1	385290	385577	VP0384	VP0384
IG52	11	Incompatibility	group_1959	Accessory	hypothetical protein	{NA}	{NA}	CP013248.1	383397	384683	FORC_022_00369
IG52	11	Incompatibility	group_2578	Accessory	hypothetical protein	{NA}	{NA}	NC_004603.1	391685	392050	VP0392	VP0392
IG52	11	Incompatibility	group_3565	Accessory	type I restriction enzyme M protein	{COG0286 Type I restriction-modification system methyltransferase subunit V Defense mechanisms ;}	{NA}	NC_004603.1	389245	390735	VP0388	VP0388
IG52	11	Incompatibility	group_3932	Accessory	hypothetical protein	{NA}	{NA}	Scaffold4	72943	73734	D9_4_01593
IG52	11	Incompatibility	group_3946	Accessory	hypothetical protein	{NA}	{NA}	Scaffold4	71448	72647	D9_4_01591
IG52	11	Incompatibility	group_402	Accessory	hypothetical protein	{NA}	{NA}	NC_004603.1	396683	397840	VP0398	VP0398
IG52	11	Incompatibility	group_4098	Accessory	hypothetical protein	{NA}	{NA}	Scaffold4	80832	80981	D9_4_01601
IG52	11	Incompatibility	group_4141	Accessory	hypothetical protein	{NA}	{NA}	NC_004603.1	403098	403433	VP0403	VP0403
IG52	11	Incompatibility	group_4541	Accessory	Helix-turn-helix domain protein	{NA}	{NA}	Scaffold4	72738	72929	D9_4_01592
IG52	11	Incompatibility	group_5175	Accessory	hypothetical protein	{NA}	{NA}	CP013248.1	382068	383393	FORC_022_00368
IG52	11	Incompatibility	group_5180	Accessory	Serine/threonine-protein kinase HipA	{COG3550 Uncharacterized protein related to capsule biosynthesis enzymes R General function prediction only ;}	{NA}	Scaffold4	66075	67403	D9_4_01586
IG52	11	Incompatibility	group_5181	Accessory	Prophage CP4-57 integrase	{NA}	{NA}	Scaffold4	64561	65883	D9_4_01585
IG52	11	Incompatibility	group_5269	Accessory	hypothetical protein	{NA}	{NA}	Scaffold4	81099	81473	D9_4_01602
IG52	11	Incompatibility	group_5635	Accessory	hypothetical protein	{NA}	{NA}	NC_004603.1	390899	391297	VP0389	VP0389
IG52	11	Incompatibility	group_5674	Accessory	hypothetical protein	{NA}	{NA}	Scaffold4	81548	81697	D9_4_01603
IG52	11	Incompatibility	group_6207	Accessory	transcriptional regulator	{NA}	{NA}	NC_004603.1	397941	398105	VP0399	VP0399
IG52	11	Incompatibility	hipA	Accessory	Y4mE	{NA}	{NA}	NC_004603.1	401699	403120	VP0402	VP0402
IG52	11	Incompatibility	hsdR	Accessory	type I restriction enzyme R protein	{COG4096 Type I site-specific restriction-modification system, R (restriction) subunit and related helicases V Defense mechanisms ;}	{NA}	NC_004603.1	393448	395892	VP0395	VP0395
IG52	11	Incompatibility	intA_1	Accessory	integrase	{NA}	{NA}	NC_004603.1	381054	382421	VP0380	VP0380
IG90	10	Incompatibility	group_2422	Accessory	hypothetical protein	{NA}	{NA}	NC_004605.1	299493	300455	VPA0299
IG90	10	Incompatibility	syrM1_1	Accessory	HTH-type transcriptional regulator SyrM 1	{NA}	{NA}	CP009848.1	311669	311959	FORC_004_03383	VPA0299
IG89	10	Compatibility	group_17866	Accessory	hypothetical protein	{NA}	{NA}	CP011407.1	1104771	1104968	FORC_014_04059
IG89	10	Compatibility	group_2576	Accessory	hypothetical protein	{NA}	{NA}	CP011407.1	1101293	1101520	FORC_014_04053
IG88	10	Compatibility	group_4202	Accessory	site-specific tyrosine recombinase XerC	{NA}	{NA}	S125_3151	16083	16967	S125_01214
IG88	10	Compatibility	group_9196	Accessory	hypothetical protein	{NA}	{NA}	S125_3151	11090	11563	S125_01211
IG87	10	Compatibility	group_1189	Accessory	Type I restriction enzyme EcoKI M protein	{COG0286 Type I restriction-modification system methyltransferase subunit V Defense mechanisms ;}	{NA}	CP013826.1	2599185	2600852	FORC_018_02399
IG87	10	Compatibility	group_1418	Accessory	hypothetical protein	{NA}	{NA}	CP013826.1	2596580	2598988	FORC_018_02398
IG87	10	Compatibility	group_2937	Accessory	Putative DNA-invertase from lambdoid prophage Rac	{NA}	{NA}	CP013826.1	2609963	2610556	FORC_018_02405
IG87	10	Compatibility	group_3374	Accessory	hypothetical protein	{NA}	{NA}	CP013826.1	2615209	2615595	FORC_018_02410
IG87	10	Compatibility	group_3580	Accessory	hypothetical protein	{NA}	{NA}	CP013826.1	2617294	2618625	FORC_018_02413
IG87	10	Compatibility	group_3621	Accessory	Prophage CP4-57 integrase	{COG0582 Integrase L Replication, recombination and repair ;}	{NA}	CP013826.1	2593870	2595096	FORC_018_02394
IG87	10	Compatibility	group_4522	Accessory	hypothetical protein	{NA}	{NA}	CP013826.1	2605663	2606364	FORC_018_02402
IG87	10	Compatibility	group_4863	Accessory	Prophage CP4-57 regulatory protein (AlpA)	{NA}	{NA}	CP013826.1	2596173	2596442	FORC_018_02397
IG87	10	Compatibility	group_4864	Accessory	hypothetical protein	{NA}	{NA}	CP013826.1	2615609	2615881	FORC_018_02411
IG87	10	Compatibility	group_5343	Accessory	putative DNA-binding transcriptional regulator	{COG3550 Uncharacterized protein related to capsule biosynthesis enzymes R General function prediction only ;}	{NA}	MIRH01000026.1	136375	137736	GCSL_R57_01173
IG87	10	Compatibility	group_6525	Accessory	Type I restriction enzyme EcoR124II R protein	{NA}	{NA}	CP013826.1	2602260	2605631	FORC_018_02401
IG87	10	Compatibility	group_7579	Accessory	Helix-turn-helix domain protein	{COG1396 Predicted transcriptional regulators K Transcription ;}	{NA}	MIRH01000026.1	137733	138203	GCSL_R57_01174
IG86	10	Incompatibility	group_11294	Accessory	hypothetical protein	{NA}	{NA}	CP014047.1	622216	622548	ATCC-17802_03574
IG86	10	Incompatibility	group_11296	Accessory	hypothetical protein	{NA}	{NA}	CP014047.1	605598	605837	ATCC-17802_03563
IG86	10	Incompatibility	group_17136	Accessory	hypothetical protein	{NA}	{NA}	CP014047.1	619696	620616	ATCC-17802_03572
IG86	10	Incompatibility	group_17137	Accessory	hypothetical protein	{NA}	{NA}	CP014047.1	623773	624342	ATCC-17802_03576
IG86	10	Incompatibility	group_2929	Accessory	hypothetical protein	{NA}	{NA}	CP014047.1	608072	608221	ATCC-17802_03565
IG86	10	Incompatibility	group_3359	Accessory	hypothetical protein	{NA}	{NA}	CP014047.1	617973	619160	ATCC-17802_03571
IG86	10	Incompatibility	group_5746	Accessory	Transposase	{NA}	{NA}	CP014047.1	622590	622937	ATCC-17802_03575
IG86	10	Incompatibility	group_8717	Accessory	hypothetical protein	{NA}	{NA}	CP014047.1	620607	621443	ATCC-17802_03573
IG86	10	Incompatibility	group_8718	Accessory	Lipase (class 3)	{NA}	{NA}	CP014047.1	624342	625538	ATCC-17802_03577
IG86	10	Incompatibility	group_899	Accessory	Reverse transcriptase (RNA-dependent DNA polymerase)	{NA}	{NA}	CP014047.1	608476	612345	ATCC-17802_03566
IG86	10	Incompatibility	ydaF_4	Accessory	Glyoxalase-like domain protein	{NA}	{NA}	CP013826.1	1389722	1389994	FORC_018_01305	VP1786
IG85	10	Compatibility	group_1093	Accessory	TrbL/VirB6 plasmid conjugal transfer protein	{NA}	{ebA97 trbL K03201 eba03080 Type IV secretion system - Azoarcus sp. EbN1 Genetic Information Processing; Folding, Sorting and Degradation}	LFWJ01000026.1	193368	194663	S195-7_00550
IG85	10	Compatibility	group_1699	Accessory	hypothetical protein	{NA}	{NA}	LFWJ01000026.1	192852	193106	S195-7_00548
IG85	10	Compatibility	group_1840	Accessory	hypothetical protein	{NA}	{NA}	LFWJ01000026.1	186055	186240	S195-7_00544
IG85	10	Compatibility	group_2594	Accessory	hypothetical protein	{NA}	{NA}	LFWJ01000026.1	198101	199453	S195-7_00555
IG85	10	Compatibility	group_3105	Accessory	hypothetical protein	{NA}	{NA}	LFWJ01000026.1	194666	194863	S195-7_00551
IG85	10	Compatibility	group_3120	Accessory	Prophage CP4-57 integrase	{COG0582 Integrase L Replication, recombination and repair ;}	{NA}	LFWJ01000026.1	202555	203745	S195-7_00559
IG85	10	Compatibility	group_4468	Accessory	hypothetical protein	{COG5314 Conjugal transfer/entry exclusion protein U Intracellular trafficking, secretion, and vesicular transport ;}	{NA}	LFWJ01000026.1	194866	195507	S195-7_00552
IG85	10	Compatibility	group_5215	Accessory	Plasmid encoded RepA protein	{NA}	{NA}	LFWJ01000026.1	196643	197656	S195-7_00553
IG85	10	Compatibility	group_5216	Accessory	Prophage CP4-57 regulatory protein (AlpA)	{NA}	{NA}	LFWJ01000026.1	197669	197893	S195-7_00554
IG85	10	Compatibility	group_789	Accessory	hypothetical protein	{NA}	{NA}	LFWJ01000026.1	193109	193399	S195-7_00549
IG84	10	Compatibility	group_12360	Accessory	hypothetical protein	{NA}	{NA}	Scaffold31	1129	1767	B5_1_02314
IG84	10	Compatibility	group_3927	Accessory	hypothetical protein	{NA}	{NA}	Scaffold31	2399	5134	B5_1_02316
IG84	10	Compatibility	group_4104	Accessory	hypothetical protein	{NA}	{NA}	Scaffold31	31665	32939	B5_1_02333
IG84	10	Compatibility	group_4217	Accessory	Tn3 transposase DDE domain protein	{NA}	{NA}	Scaffold31	33888	36914	B5_1_02335
IG84	10	Compatibility	group_5884	Accessory	hypothetical protein	{NA}	{NA}	Scaffold31	10898	11530	B5_1_02321
IG84	10	Compatibility	group_5885	Accessory	hypothetical protein	{NA}	{NA}	Scaffold31	5140	5889	B5_1_02317
IG84	10	Compatibility	group_6573	Accessory	hypothetical protein	{NA}	{NA}	Scaffold31	5889	6944	B5_1_02318
IG84	10	Compatibility	group_7659	Accessory	hypothetical protein	{NA}	{NA}	Scaffold31	1845	2402	B5_1_02315
IG84	10	Compatibility	ompA_7	Accessory	Outer membrane protein A precursor	{NA}	{NA}	Scaffold31	6944	7864	B5_1_02319
IG83	10	Compatibility	group_12236	Accessory	hypothetical protein	{NA}	{NA}	Scaffold14	4167	4928	C3_2_04007
IG83	10	Compatibility	group_12237	Accessory	hypothetical protein	{NA}	{NA}	Scaffold14	4921	5898	C3_2_04008
IG83	10	Compatibility	group_12238	Accessory	hypothetical protein	{NA}	{NA}	Scaffold14	5895	6665	C3_2_04009
IG83	10	Compatibility	group_12240	Accessory	hypothetical protein	{NA}	{NA}	Scaffold14	21160	21972	C3_2_04027
IG83	10	Compatibility	group_12241	Accessory	hypothetical protein	{NA}	{NA}	Scaffold14	21911	22144	C3_2_04028
IG83	10	Compatibility	group_12242	Accessory	hypothetical protein	{NA}	{NA}	Scaffold14	24769	25116	C3_2_04030
IG83	10	Compatibility	group_12243	Accessory	hypothetical protein	{NA}	{NA}	Scaffold14	33709	34032	C3_2_04037
IG83	10	Compatibility	group_12245	Accessory	Sporulation initiation inhibitor protein Soj	{NA}	{NA}	Scaffold14	43741	44514	C3_2_04046
IG83	10	Compatibility	group_12247	Accessory	VRR-NUC domain protein	{NA}	{NA}	Scaffold14	66328	67056	C3_2_04067
IG83	10	Compatibility	group_12248	Accessory	DNA N-6-adenine-methyltransferase (Dam)	{NA}	{NA}	Scaffold14	68982	69620	C3_2_04072
IG83	10	Compatibility	group_12249	Accessory	hypothetical protein	{NA}	{NA}	Scaffold14	72950	74344	C3_2_04079
IG83	10	Compatibility	group_12250	Accessory	hypothetical protein	{NA}	{NA}	Scaffold14	78970	79170	C3_2_04085
IG83	10	Compatibility	group_19365	Accessory	hypothetical protein	{NA}	{NA}	Scaffold14	13947	14555	C3_2_04019
IG83	10	Compatibility	group_19367	Accessory	hypothetical protein	{NA}	{NA}	Scaffold14	62252	62551	C3_2_04059
IG83	10	Compatibility	group_19369	Accessory	Tyrosine recombinase XerD	{NA}	{NA}	Scaffold14	78325	78954	C3_2_04084
IG83	10	Compatibility	group_3657	Accessory	Adenosine monophosphate-protein transferase SoFic	{COG3177 Uncharacterized conserved protein S Function unknown ;}	{NA}	Scaffold14	15132	16463	C3_2_04021
IG83	10	Compatibility	group_3658	Accessory	hypothetical protein	{NA}	{NA}	Scaffold14	70113	70367	C3_2_04074
IG83	10	Compatibility	group_3925	Accessory	hypothetical protein	{NA}	{NA}	Scaffold14	64877	65323	C3_2_04063
IG83	10	Compatibility	group_4207	Accessory	hypothetical protein	{NA}	{NA}	Scaffold14	71734	72249	C3_2_04077
IG83	10	Compatibility	group_4208	Accessory	hypothetical protein	{NA}	{NA}	Scaffold14	80652	81176	C3_2_04088
IG83	10	Compatibility	group_4940	Accessory	hypothetical protein	{NA}	{NA}	Scaffold14	88506	88934	C3_2_04107
IG83	10	Compatibility	group_5352	Accessory	hypothetical protein	{NA}	{NA}	Scaffold14	7781	8122	C3_2_04012
IG83	10	Compatibility	group_5353	Accessory	DNA-directed RNA polymerase subunit alpha	{NA}	{NA}	Scaffold14	11314	11679	C3_2_04016
IG83	10	Compatibility	group_5354	Accessory	hypothetical protein	{NA}	{NA}	Scaffold14	39920	40603	C3_2_04041
IG83	10	Compatibility	group_5355	Accessory	hypothetical protein	{NA}	{NA}	Scaffold14	60619	60852	C3_2_04055
IG83	10	Compatibility	group_5356	Accessory	Transcriptional regulator PadR-like family protein	{NA}	{NA}	Scaffold14	89859	90392	C3_2_04109
IG83	10	Compatibility	group_5866	Accessory	hypothetical protein	{NA}	{NA}	Scaffold14	11672	13246	C3_2_04017
IG83	10	Compatibility	group_5867	Accessory	hypothetical protein	{NA}	{NA}	Scaffold14	45803	52522	C3_2_04049
IG83	10	Compatibility	group_5868	Accessory	hypothetical protein	{NA}	{NA}	Scaffold14	55636	55989	C3_2_04052
IG83	10	Compatibility	group_5871	Accessory	hypothetical protein	{NA}	{NA}	Scaffold14	83566	83808	C3_2_04095
IG83	10	Compatibility	group_5873	Accessory	hypothetical protein	{NA}	{NA}	Scaffold14	90725	91390	C3_2_04111
IG83	10	Compatibility	group_5874	Accessory	hypothetical protein	{NA}	{NA}	Scaffold14	91488	92120	C3_2_04112
IG83	10	Compatibility	group_5875	Accessory	hypothetical protein	{NA}	{NA}	Scaffold14	92440	93591	C3_2_04114
IG83	10	Compatibility	group_5922	Accessory	hypothetical protein	{NA}	{NA}	Scaffold14	22101	24764	C3_2_04029
IG83	10	Compatibility	group_6545	Accessory	hypothetical protein	{NA}	{NA}	Scaffold14	8922	9269	C3_2_04014
IG83	10	Compatibility	group_6546	Accessory	hypothetical protein	{NA}	{NA}	Scaffold14	13269	13937	C3_2_04018
IG83	10	Compatibility	group_6549	Accessory	hypothetical protein	{NA}	{NA}	Scaffold14	68762	69004	C3_2_04071
IG83	10	Compatibility	group_6550	Accessory	hypothetical protein	{NA}	{NA}	Scaffold14	69635	70120	C3_2_04073
IG83	10	Compatibility	group_6551	Accessory	hypothetical protein	{NA}	{NA}	Scaffold14	76987	77193	C3_2_04082
IG83	10	Compatibility	group_6552	Accessory	hypothetical protein	{NA}	{NA}	Scaffold14	79261	79782	C3_2_04086
IG83	10	Compatibility	group_6555	Accessory	hypothetical protein	{NA}	{NA}	Scaffold14	84411	84566	C3_2_04098
IG83	10	Compatibility	group_6557	Accessory	hypothetical protein	{NA}	{NA}	Scaffold14	93588	94091	C3_2_04115
IG83	10	Compatibility	group_6797	Accessory	hypothetical protein	{NA}	{NA}	Scaffold14	25113	26510	C3_2_04031
IG83	10	Compatibility	group_7610	Accessory	hypothetical protein	{NA}	{NA}	Scaffold14	9552	11201	C3_2_04015
IG83	10	Compatibility	group_7611	Accessory	hypothetical protein	{NA}	{NA}	Scaffold14	14569	15066	C3_2_04020
IG83	10	Compatibility	group_7613	Accessory	hypothetical protein	{NA}	{NA}	Scaffold14	27582	28043	C3_2_04033
IG83	10	Compatibility	group_7614	Accessory	hypothetical protein	{NA}	{NA}	Scaffold14	34435	35061	C3_2_04039
IG83	10	Compatibility	group_7617	Accessory	hypothetical protein	{NA}	{NA}	Scaffold14	45321	45746	C3_2_04048
IG83	10	Compatibility	group_7618	Accessory	hypothetical protein	{NA}	{NA}	Scaffold14	52904	54577	C3_2_04050
IG83	10	Compatibility	group_7619	Accessory	hypothetical protein	{NA}	{NA}	Scaffold14	60993	61424	C3_2_04056
IG83	10	Compatibility	group_7620	Accessory	hypothetical protein	{NA}	{NA}	Scaffold14	75934	76821	C3_2_04081
IG83	10	Compatibility	group_7621	Accessory	hypothetical protein	{NA}	{NA}	Scaffold14	79900	80157	C3_2_04087
IG83	10	Compatibility	group_7624	Accessory	hypothetical protein	{NA}	{NA}	Scaffold14	85528	86274	C3_2_04101
IG83	10	Compatibility	group_7625	Accessory	hypothetical protein	{NA}	{NA}	Scaffold14	89384	89842	C3_2_04108
IG83	10	Compatibility	group_9284	Accessory	PAAR motif protein	{NA}	{NA}	Scaffold14	6672	6956	C3_2_04010
IG83	10	Compatibility	group_9285	Accessory	hypothetical protein	{NA}	{NA}	Scaffold14	20073	20633	C3_2_04025
IG83	10	Compatibility	group_9286	Accessory	hypothetical protein	{NA}	{NA}	Scaffold14	20645	21160	C3_2_04026
IG83	10	Compatibility	group_9287	Accessory	hypothetical protein	{NA}	{NA}	Scaffold14	26685	27524	C3_2_04032
IG83	10	Compatibility	group_9290	Accessory	hypothetical protein	{NA}	{NA}	Scaffold14	34029	34442	C3_2_04038
IG83	10	Compatibility	group_9292	Accessory	hypothetical protein	{NA}	{NA}	Scaffold14	44514	44756	C3_2_04047
IG83	10	Compatibility	group_9293	Accessory	hypothetical protein	{NA}	{NA}	Scaffold14	54591	55544	C3_2_04051
IG83	10	Compatibility	group_9294	Accessory	Helix-turn-helix	{NA}	{NA}	Scaffold14	61399	61701	C3_2_04057
IG83	10	Compatibility	group_9296	Accessory	hypothetical protein	{NA}	{NA}	Scaffold14	64008	64205	C3_2_04061
IG83	10	Compatibility	group_9297	Accessory	hypothetical protein	{NA}	{NA}	Scaffold14	65861	66325	C3_2_04066
IG83	10	Compatibility	group_9298	Accessory	hypothetical protein	{NA}	{NA}	Scaffold14	67084	67782	C3_2_04068
IG83	10	Compatibility	group_9300	Accessory	hypothetical protein	{NA}	{NA}	Scaffold14	72246	72641	C3_2_04078
IG83	10	Compatibility	group_9301	Accessory	hypothetical protein	{NA}	{NA}	Scaffold14	74337	75833	C3_2_04080
IG83	10	Compatibility	group_9302	Accessory	hypothetical protein	{NA}	{NA}	Scaffold14	77867	78325	C3_2_04083
IG83	10	Compatibility	group_9303	Accessory	ASCH domain protein	{NA}	{NA}	Scaffold14	83819	84178	C3_2_04096
IG83	10	Compatibility	group_9305	Accessory	hypothetical protein	{NA}	{NA}	Scaffold14	92113	92436	C3_2_04113
IG83	10	Compatibility	hup	Accessory	DNA-binding protein HU	{NA}	{NA}	Scaffold14	68150	68473	C3_2_04069
IG83	10	Compatibility	ihfB_2	Accessory	Integration host factor subunit beta	{NA}	{NA}	Scaffold14	68473	68769	C3_2_04070
IG83	10	Compatibility	lytC	Accessory	N-acetylmuramoyl-L-alanine amidase	{NA}	{NA}	Scaffold14	8371	8919	C3_2_04013
IG83	10	Compatibility	smc_1	Accessory	hypothetical protein	{NA}	{NA}	Scaffold14	35058	39851	C3_2_04040
IG83	10	Compatibility	smc_2	Accessory	hypothetical protein	{NA}	{NA}	Scaffold14	62608	64011	C3_2_04060
IG83	10	Compatibility	spo0C	Accessory	Chromosome-partitioning protein Spo0J	{NA}	{NA}	Scaffold14	42827	43744	C3_2_04045
IG83	10	Compatibility	ssb_1	Accessory	Single-stranded DNA-binding protein	{COG0629 Single-stranded DNA-binding protein L Replication, recombination and repair ;}	{VC0397 K03111 vch03440 Homologous recombination - Vibrio cholerae O1 Genetic Information Processing; Replication and Repair}	Scaffold14	61705	62247	C3_2_04058
IG82	10	Compatibility	group_1596	Accessory	hypothetical protein	{NA}	{NA}	JZAO01000108.1	399357	400118	08-0278_00548
IG82	10	Compatibility	group_1966	Accessory	hypothetical protein	{NA}	{NA}	JZAO01000108.1	356242	356745	08-0278_00516
IG82	10	Compatibility	group_1967	Accessory	hypothetical protein	{NA}	{NA}	JZAO01000108.1	379359	379781	08-0278_00530
IG82	10	Compatibility	group_1968	Accessory	hypothetical protein	{NA}	{NA}	JZAO01000108.1	399003	399197	08-0278_00547
IG82	10	Compatibility	group_2755	Accessory	hypothetical protein	{NA}	{NA}	JZAO01000108.1	356902	357330	08-0278_00517
IG82	10	Compatibility	group_2925	Accessory	hypothetical protein	{NA}	{NA}	JZAO01000108.1	378970	379362	08-0278_00529
IG82	10	Compatibility	group_3109	Accessory	hypothetical protein	{NA}	{NA}	JZAO01000108.1	350725	350997	08-0278_00512
IG81	10	Compatibility	group_1838	Accessory	Prophage CP4-57 integrase	{NA}	{NA}	MITM01000097.1	340792	342087	CDC_K5009W_03678
IG81	10	Compatibility	group_2599	Accessory	Virulence-associated protein E	{NA}	{NA}	MITM01000097.1	343158	344426	CDC_K5009W_03681
IG81	10	Compatibility	group_4454	Accessory	hypothetical protein	{NA}	{NA}	MITM01000097.1	347834	348073	CDC_K5009W_03687
IG81	10	Compatibility	group_4455	Accessory	Prophage CP4-57 regulatory protein (AlpA)	{NA}	{NA}	MITM01000097.1	344621	344815	CDC_K5009W_03682
IG81	10	Compatibility	group_4456	Accessory	Prophage CP4-57 regulatory protein (AlpA)	{NA}	{NA}	MITM01000097.1	342974	343174	CDC_K5009W_03680
IG81	10	Compatibility	group_4837	Accessory	hypothetical protein	{NA}	{NA}	MITM01000097.1	346154	346516	CDC_K5009W_03685
IG81	10	Compatibility	group_5242	Accessory	hypothetical protein	{NA}	{NA}	MITM01000097.1	346999	347874	CDC_K5009W_03686
IG80	10	Compatibility	bcp_2	Accessory	Putative peroxiredoxin bcp	{COG1225 Peroxiredoxin O Posttranslational modification, protein turnover, chaperones ;}	{NA}	S011_3890	1315	1779	S011_02752
IG80	10	Compatibility	group_3612	Accessory	hypothetical protein	{NA}	{NA}	S011_3890	4601	6928	S011_02755
IG80	10	Compatibility	group_3613	Accessory	hypothetical protein	{NA}	{NA}	S011_3890	1894	2391	S011_02753
IG80	10	Compatibility	group_5254	Accessory	Phage integrase family protein	{NA}	{NA}	S011_3890	2391	4586	S011_02754
IG80	10	Compatibility	group_5764	Accessory	site-specific tyrosine recombinase XerC	{NA}	{NA}	S011_3890	6928	8331	S011_02756
IG80	10	Compatibility	group_8792	Accessory	hypothetical protein	{NA}	{NA}	S011_4032	18080	18559	S011_02729
IG79	10	Incompatibility	group_1048	Accessory	Multidrug resistance protein MdtL	{COG0477 Permeases of the major facilitator superfamily GEPR Carbohydrate transport and metabolism ; Amino acid transport and metabolism ; Inorganic ion transport and metabolism ; General function prediction only ;}	{NA}	JWSS01000002.1	1007682	1008890	10329_04034
IG79	10	Incompatibility	group_6790	Accessory	Melibiose operon regulatory protein	{COG2207 AraC-type DNA-binding domain-containing proteins K Transcription ;}	{NA}	Scaffold20	31251	32252	C7_4_02635
IG79	10	Incompatibility	melA	Accessory	Alpha-galactosidase	{COG1486 Alpha-galactosidases/6-phospho-beta-glucosidases, family 4 of glycosyl hydrolases G Carbohydrate transport and metabolism ;}	{PBPRB0258 K07406 3.2.1.22 ppr00603 Glycosphingolipid biosynthesis - globoseries - Photobacterium profundum Metabolism; Glycan Biosynthesis and Metabolism}	Scaffold20	32563	33915	C7_4_02636
IG79	10	Incompatibility	melB	Accessory	Melibiose carrier protein	{COG2211 Na+/melibiose symporter and related transporters G Carbohydrate transport and metabolism ;}	{NA}	Scaffold20	33983	35410	C7_4_02637
IG79	10	Incompatibility	rafA_2	Accessory	Alpha-galactosidase	{COG3345 Alpha-galactosidase G Carbohydrate transport and metabolism ;}	{Ping_2014 K07407 3.2.1.22 pin00603 Glycosphingolipid biosynthesis - globoseries - Psychromonas ingrahamii Metabolism; Glycan Biosynthesis and Metabolism}	Scaffold20	35579	37681	C7_4_02638
IG79	10	Incompatibility	yidZ_2	Accessory	HTH-type transcriptional regulator YidZ	{COG0583 Transcriptional regulator K Transcription ;}	{NA}	JWSS01000002.1	1008865	1009821	10329_04035
IG78	10	Compatibility	group_12205	Accessory	hypothetical protein	{NA}	{NA}	Scaffold1	289127	290815	C3_3_00280
IG78	10	Compatibility	group_1839	Accessory	hypothetical protein	{NA}	{NA}	Scaffold1	292698	292841	C3_3_00282
IG78	10	Compatibility	group_19315	Accessory	hypothetical protein	{NA}	{NA}	Scaffold1	293456	293707	C3_3_00283
IG78	10	Compatibility	group_5924	Accessory	hypothetical protein	{NA}	{NA}	Scaffold1	293891	296065	C3_3_00284
IG78	10	Compatibility	group_9262	Accessory	hypothetical protein	{NA}	{NA}	Scaffold1	290828	292405	C3_3_00281
IG77	10	Compatibility	group_18844	Accessory	SnoaL-like domain protein	{NA}	{NA}	Scaffold1	497651	498667	E3_6_00442
IG77	10	Compatibility	group_9139	Accessory	Sodium/glucose cotransporter	{NA}	{NA}	Scaffold1	500403	501944	E3_6_00444
IG77	10	Compatibility	ompF_2	Accessory	Outer membrane protein C precursor	{NA}	{NA}	Scaffold1	496388	497473	E3_6_00441
IG77	10	Compatibility	pcaK	Accessory	4-hydroxybenzoate transporter PcaK	{COG0477 Permeases of the major facilitator superfamily GEPR Carbohydrate transport and metabolism ; Amino acid transport and metabolism ; Inorganic ion transport and metabolism ; General function prediction only ;}	{NA}	Scaffold1	498769	500064	E3_6_00443
IG77	10	Compatibility	purR_2	Accessory	HTH-type transcriptional repressor PurR	{COG1609 Transcriptional regulators K Transcription ;}	{NA}	Scaffold1	495129	496208	E3_6_00440
IG76	10	Compatibility	group_11230	Accessory	DeoR-like helix-turn-helix domain protein	{NA}	{NA}	Scaffold7	14737	15636	D2_2_03546
IG76	10	Compatibility	group_11231	Accessory	SMI1 / KNR4 family protein	{NA}	{NA}	Scaffold7	6116	6532	D2_2_03540
IG76	10	Compatibility	group_17029	Accessory	hypothetical protein	{NA}	{NA}	Scaffold7	15812	16459	D2_2_03547
IG76	10	Compatibility	group_6318	Accessory	AAA-like domain protein	{NA}	{NA}	Scaffold7	7221	10475	D2_2_03542
IG76	10	Compatibility	group_8665	Accessory	hypothetical protein	{NA}	{NA}	Scaffold7	13829	14740	D2_2_03545
IG75	10	Compatibility	dnaG_1	Accessory	Toprim domain protein	{NA}	{NA}	CP010883.1	1815178	1816821	CHN25_01695
IG75	10	Compatibility	group_10983	Accessory	hypothetical protein	{NA}	{NA}	CP010883.1	1817194	1817784	CHN25_01697
IG75	10	Compatibility	group_10984	Accessory	hypothetical protein	{NA}	{NA}	CP010883.1	1811474	1811761	CHN25_01689
IG75	10	Compatibility	group_10985	Accessory	hypothetical protein	{NA}	{NA}	CP010883.1	1810413	1810634	CHN25_01687
IG75	10	Compatibility	group_11009	Accessory	transcriptional repressor CodY	{NA}	{NA}	CP010883.1	1777930	1778445	CHN25_01642
IG75	10	Compatibility	group_11010	Accessory	Peptidase M15	{NA}	{NA}	CP010883.1	1781545	1781910	CHN25_01647
IG75	10	Compatibility	group_11011	Accessory	hypothetical protein	{NA}	{NA}	CP010883.1	1781919	1782449	CHN25_01648
IG75	10	Compatibility	group_11012	Accessory	hypothetical protein	{NA}	{NA}	CP010883.1	1783472	1783846	CHN25_01650
IG75	10	Compatibility	group_11013	Accessory	hypothetical protein	{NA}	{NA}	CP010883.1	1789405	1789944	CHN25_01653
IG75	10	Compatibility	group_11014	Accessory	hypothetical protein	{NA}	{NA}	CP010883.1	1789956	1790537	CHN25_01654
IG75	10	Compatibility	group_11015	Accessory	hypothetical protein	{NA}	{NA}	CP010883.1	1792859	1793152	CHN25_01656
IG75	10	Compatibility	group_11016	Accessory	hypothetical protein	{NA}	{NA}	CP010883.1	1793197	1793532	CHN25_01657
IG75	10	Compatibility	group_11017	Accessory	Phage capsid family protein	{NA}	{NA}	CP010883.1	1795960	1797150	CHN25_01663
IG75	10	Compatibility	group_11018	Accessory	hypothetical protein	{NA}	{NA}	CP010883.1	1801275	1801469	CHN25_01667
IG75	10	Compatibility	group_16434	Accessory	Tellurite resistance protein TerB	{NA}	{NA}	CP010883.1	1812399	1812830	CHN25_01693
IG75	10	Compatibility	group_16435	Accessory	hypothetical protein	{NA}	{NA}	CP010883.1	1812220	1812393	CHN25_01692
IG75	10	Compatibility	group_16436	Accessory	hypothetical protein	{NA}	{NA}	CP010883.1	1811804	1812052	CHN25_01690
IG75	10	Compatibility	group_16437	Accessory	DNA polymerase I	{NA}	{NA}	CP010883.1	1810622	1811464	CHN25_01688
IG75	10	Compatibility	group_16438	Accessory	hypothetical protein	{NA}	{NA}	CP010883.1	1809922	1810416	CHN25_01686
IG75	10	Compatibility	group_16439	Accessory	hypothetical protein	{NA}	{NA}	CP010883.1	1809531	1809653	CHN25_01684
IG75	10	Compatibility	group_16440	Accessory	Deoxyguanosine kinase	{NA}	{NA}	CP010883.1	1808925	1809518	CHN25_01683
IG75	10	Compatibility	group_16537	Accessory	hypothetical protein	{NA}	{NA}	CP010883.1	1776717	1777043	CHN25_01640
IG75	10	Compatibility	group_16541	Accessory	Anaerobic sulfatase-maturating enzyme	{NA}	{NA}	CP010883.1	1782449	1783456	CHN25_01649
IG75	10	Compatibility	group_16542	Accessory	Phage major tail protein 2	{NA}	{NA}	CP010883.1	1793599	1794054	CHN25_01658
IG75	10	Compatibility	group_16543	Accessory	hypothetical protein	{NA}	{NA}	CP010883.1	1794438	1795046	CHN25_01660
IG75	10	Compatibility	group_16544	Accessory	Phage head-tail joining protein	{NA}	{NA}	CP010883.1	1795039	1795383	CHN25_01661
IG75	10	Compatibility	group_16546	Accessory	Caudovirus prohead protease	{NA}	{NA}	CP010883.1	1797245	1798093	CHN25_01664
IG75	10	Compatibility	group_16547	Accessory	Antirestriction protein (ArdA)	{NA}	{NA}	CP010883.1	1803648	1804292	CHN25_01672
IG75	10	Compatibility	group_16548	Accessory	hypothetical protein	{NA}	{NA}	CP010883.1	1804348	1804560	CHN25_01673
IG75	10	Compatibility	group_16549	Accessory	hypothetical protein	{NA}	{NA}	CP010883.1	1806335	1806517	CHN25_01677
IG75	10	Compatibility	group_17897	Accessory	Phage gp6-like head-tail connector protein	{NA}	{NA}	CP010883.1	1795396	1795944	CHN25_01662
IG75	10	Compatibility	group_34184	Accessory	hypothetical protein	{NA}	{NA}	CP010883.1	1801479	1802039	CHN25_01668
IG75	10	Compatibility	group_3816	Accessory	Recombinase	{NA}	{NA}	CP010883.1	1823210	1824874	CHN25_01704
IG75	10	Compatibility	group_5660	Accessory	hypothetical protein	{NA}	{NA}	CP010883.1	1778442	1779197	CHN25_01643
IG75	10	Compatibility	group_5794	Accessory	hypothetical protein	{NA}	{NA}	CP010883.1	1783850	1789000	CHN25_01651
IG75	10	Compatibility	group_6239	Accessory	hypothetical protein	{NA}	{NA}	CP010883.1	1818564	1819568	CHN25_01700
IG75	10	Compatibility	group_6240	Accessory	hypothetical protein	{NA}	{NA}	CP010883.1	1817923	1818462	CHN25_01699
IG75	10	Compatibility	group_6241	Accessory	hypothetical protein	{NA}	{NA}	CP010883.1	1808720	1808932	CHN25_01682
IG75	10	Compatibility	group_6249	Accessory	Phage Terminase	{NA}	{NA}	CP010883.1	1799391	1801151	CHN25_01666
IG75	10	Compatibility	group_7130	Accessory	Endodeoxyribonuclease RusA	{NA}	{NA}	CP010883.1	1816834	1817145	CHN25_01696
IG75	10	Compatibility	group_7132	Accessory	thymidylate kinase	{NA}	{NA}	CP010883.1	1807846	1808433	CHN25_01680
IG75	10	Compatibility	group_7138	Accessory	hypothetical protein	{NA}	{NA}	CP010883.1	1789004	1789402	CHN25_01652
IG75	10	Compatibility	group_7139	Accessory	hypothetical protein	{NA}	{NA}	CP010883.1	1790549	1792843	CHN25_01655
IG75	10	Compatibility	group_7140	Accessory	Phage terminase, small subunit	{NA}	{NA}	CP010883.1	1802056	1802562	CHN25_01669
IG75	10	Compatibility	group_7141	Accessory	hypothetical protein	{NA}	{NA}	CP010883.1	1805984	1806253	CHN25_01676
IG75	10	Compatibility	group_8520	Accessory	hypothetical protein	{NA}	{NA}	CP010883.1	1822178	1822828	CHN25_01702
IG75	10	Compatibility	group_8521	Accessory	DNA-dependent RNA polymerase	{NA}	{NA}	CP010883.1	1819902	1822076	CHN25_01701
IG75	10	Compatibility	group_8522	Accessory	hypothetical protein	{NA}	{NA}	CP010883.1	1812036	1812233	CHN25_01691
IG75	10	Compatibility	group_8523	Accessory	hypothetical protein	{NA}	{NA}	CP010883.1	1809653	1809919	CHN25_01685
IG75	10	Compatibility	group_8524	Accessory	hypothetical protein	{NA}	{NA}	CP010883.1	1808433	1808720	CHN25_01681
IG75	10	Compatibility	group_8532	Accessory	hypothetical protein	{NA}	{NA}	CP010883.1	1794067	1794435	CHN25_01659
IG75	10	Compatibility	group_8533	Accessory	Phage portal protein	{NA}	{NA}	CP010883.1	1798056	1799381	CHN25_01665
IG75	10	Compatibility	group_8534	Accessory	hypothetical protein	{NA}	{NA}	CP010883.1	1803246	1803437	CHN25_01671
IG75	10	Compatibility	group_8535	Accessory	hypothetical protein	{NA}	{NA}	CP010883.1	1806556	1806819	CHN25_01678
IG75	10	Compatibility	polA_1	Accessory	DNA polymerase I, thermostable	{NA}	{NA}	CP010883.1	1813127	1815178	CHN25_01694
IG74	10	Compatibility	group_12716	Accessory	EamA-like transporter family protein	{NA}	{NA}	Scaffold61	2308	3285	A3_6_04580
IG74	10	Compatibility	group_7755	Accessory	putative peptidase	{COG0006 Xaa-Pro aminopeptidase E Amino acid transport and metabolism ;}	{NA}	Scaffold61	3361	4527	A3_6_04581
IG74	10	Compatibility	group_9539	Accessory	Enamine/imine deaminase	{COG0251 Putative translation initiation inhibitor, yjgF family J Translation, ribosomal structure and biogenesis ;}	{NA}	Scaffold61	4918	5304	A3_6_04582
IG74	10	Compatibility	ygeX	Accessory	Diaminopropionate ammonia-lyase	{COG1171 Threonine dehydratase E Amino acid transport and metabolism ;}	{NA}	Scaffold61	5375	6538	A3_6_04583
IG74	10	Compatibility	yxeP	Accessory	putative hydrolase YxeP	{NA}	{NA}	Scaffold61	1092	2243	A3_6_04579
IG73	10	Compatibility	group_3669	Accessory	GDP-mannose 4,6-dehydratase	{COG1089 GDP-D-mannose dehydratase M Cell wall/membrane/envelope biogenesis ;}	{VV0349 K01711 4.2.1.47 vvy00051 Fructose and mannose metabolism - Vibrio vulnificus YJ016 Metabolism; Carbohydrate Metabolism}	Scaffold3	217245	218381	D4_5_01715
IG73	10	Compatibility	group_4560	Accessory	Glycosyl transferases group 1	{NA}	{NA}	Scaffold3	231428	233959	D4_5_01725
IG73	10	Compatibility	group_7807	Accessory	GDP-L-fucose synthase	{COG0451 Nucleoside-diphosphate-sugar epimerases MG Cell wall/membrane/envelope biogenesis ; Carbohydrate transport and metabolism ;}	{Ping_0771 K02377 1.1.1.271 pin00051 Fructose and mannose metabolism - Psychromonas ingrahamii Metabolism; Carbohydrate Metabolism}	Scaffold3	216215	217141	D4_5_01714
IG73	10	Compatibility	group_7808	Accessory	GDP-mannose mannosyl hydrolase	{COG0494 NTP pyrophosphohydrolases including oxidative damage repair enzymes LR Replication, recombination and repair ; General function prediction only ;}	{NA}	Scaffold3	215679	216146	D4_5_01713
IG73	10	Compatibility	group_9624	Accessory	hypothetical protein	{NA}	{NA}	Scaffold3	214815	215678	D4_5_01712
IG72	10	Compatibility	group_11683	Accessory	Helix-turn-helix domain protein	{NA}	{NA}	14-692-A-1-VP_30	120258	120584	14-692-A-1-VP_03113
IG72	10	Compatibility	group_3894	Accessory	hypothetical protein	{NA}	{NA}	14-692-A-1-VP_30	104159	106318	14-692-A-1-VP_03104
IG72	10	Compatibility	group_4893	Accessory	site-specific tyrosine recombinase XerC	{NA}	{NA}	14-692-A-1-VP_30	118443	119660	14-692-A-1-VP_03112
IG72	10	Compatibility	group_5289	Accessory	hypothetical protein	{NA}	{NA}	14-692-A-1-VP_30	107124	108368	14-692-A-1-VP_03105
IG72	10	Compatibility	group_7445	Accessory	hypothetical protein	{NA}	{NA}	14-692-A-1-VP_30	108490	109665	14-692-A-1-VP_03106
IG71	10	Compatibility	group_4884	Accessory	hypothetical protein	{NA}	{NA}	MIRP01000077.1	632695	633537	GCSL_R76_04537
IG71	10	Compatibility	group_4886	Accessory	hypothetical protein	{NA}	{NA}	MIRP01000077.1	630254	631636	GCSL_R76_04535
IG71	10	Compatibility	group_6088	Accessory	hypothetical protein	{NA}	{NA}	MIRP01000077.1	635634	636446	GCSL_R76_04539
IG71	10	Compatibility	group_6089	Accessory	hypothetical protein	{NA}	{NA}	MIRP01000077.1	636551	637435	GCSL_R76_04540
IG70	10	Compatibility	group_2923	Accessory	Transposon Tn3 resolvase	{COG1961 Site-specific recombinases, DNA invertase Pin homologs L Replication, recombination and repair ;}	{NA}	Scaffold4	365094	365645	C7_9_02420
IG70	10	Compatibility	group_3122	Accessory	hypothetical protein	{NA}	{NA}	Scaffold4	373364	373930	C7_9_02432
IG70	10	Compatibility	group_3352	Accessory	hypothetical protein	{NA}	{NA}	Scaffold4	364117	364419	C7_9_02417
IG70	10	Compatibility	group_3375	Accessory	hypothetical protein	{NA}	{NA}	Scaffold4	372988	373176	C7_9_02431
IG69	10	Incompatibility	group_11059	Accessory	Glyoxalase-like domain protein	{COG3324 Predicted enzyme related to lactoylglutathione lyase R General function prediction only ;}	{NA}	JNSR01000005.1	16663	17022	CFSAN007434_00287
IG69	10	Incompatibility	group_3697	Accessory	AnkB protein	{NA}	{NA}	NC_004605.1	306512	306979	VPA0306	VPA0306
IG69	10	Incompatibility	katB	Accessory	catalase	{COG0753 Catalase P Inorganic ion transport and metabolism ;}	{VPA0305 K03781 1.11.1.6 vpa00680 Methane metabolism - Vibrio parahaemolyticus Metabolism; Energy Metabolism}	NC_004605.1	304869	306410	VPA0305	VPA0305
IG69	10	Incompatibility	yijE_2	Accessory	putative DMT superfamily transporter inner membrane protein	{COG0697 Permeases of the drug/metabolite transporter (DMT) superfamily GER Carbohydrate transport and metabolism ; Amino acid transport and metabolism ; General function prediction only ;}	{NA}	JNSR01000005.1	17140	18039	CFSAN007434_00288
IG68	10	Compatibility	group_1307	Accessory	Tail fiber protein	{NA}	{NA}	CP010883.1	1159121	1161979	CHN25_01091
IG68	10	Compatibility	group_1394	Accessory	hypothetical protein	{NA}	{NA}	CP010883.1	1163365	1164036	CHN25_01095
IG68	10	Compatibility	group_1601	Accessory	Terminase-like family protein	{COG5484 Uncharacterized conserved protein S Function unknown ;}	{NA}	CP010883.1	1145632	1147521	CHN25_01073
IG68	10	Compatibility	group_2267	Accessory	Phage-related minor tail protein	{NA}	{NA}	CP010883.1	1155104	1156990	CHN25_01087
IG68	10	Compatibility	group_2427	Accessory	Phage portal protein	{NA}	{NA}	CP010883.1	1144607	1145635	CHN25_01072
IG68	10	Compatibility	group_2752	Accessory	hypothetical protein	{NA}	{NA}	CP010883.1	1154133	1154363	CHN25_01084
IG68	10	Compatibility	group_2921	Accessory	hypothetical protein	{NA}	{NA}	CP010883.1	1158505	1159107	CHN25_01090
IG68	10	Compatibility	group_2922	Accessory	hypothetical protein	{NA}	{NA}	CP010883.1	1162685	1163374	CHN25_01094
IG68	10	Compatibility	group_2967	Accessory	hypothetical protein	{NA}	{NA}	CP010883.1	1164038	1164235	CHN25_01096
IG68	10	Compatibility	group_3158	Accessory	Phage head completion protein (GPL)	{NA}	{NA}	CP010883.1	1150277	1150696	CHN25_01077
IG68	10	Compatibility	group_3159	Accessory	hypothetical protein	{NA}	{NA}	CP010883.1	1143964	1144275	CHN25_01071
IG68	10	Compatibility	group_3848	Accessory	Baseplate J-like protein	{NA}	{NA}	CP010883.1	1157331	1158518	CHN25_01089
IG68	10	Compatibility	group_3919	Accessory	hypothetical protein	{NA}	{NA}	CP011406.1	1186493	1187029	FORC_014_01104
IG68	10	Compatibility	group_4204	Accessory	Phage capsid scaffolding protein (GPO) serine peptidase	{NA}	{NA}	CP010883.1	1147574	1148431	CHN25_01074
IG68	10	Compatibility	group_4227	Accessory	P2 phage tail completion protein R (GpR)	{NA}	{NA}	CP010883.1	1150693	1151184	CHN25_01078
IG68	10	Compatibility	group_4433	Accessory	hypothetical protein	{NA}	{NA}	CP010883.1	1156990	1157331	CHN25_01088
IG68	10	Compatibility	group_4555	Accessory	hypothetical protein	{NA}	{NA}	CP010883.1	1137270	1137605	CHN25_01063
IG68	10	Compatibility	group_4814	Accessory	hypothetical protein	{NA}	{NA}	CP010883.1	1151168	1151824	CHN25_01079
IG68	10	Compatibility	group_4815	Accessory	hypothetical protein	{NA}	{NA}	CP010883.1	1151828	1152958	CHN25_01080
IG68	10	Compatibility	group_4930	Accessory	hypothetical protein	{NA}	{NA}	CP010883.1	1154647	1154910	CHN25_01086
IG68	10	Compatibility	group_5208	Accessory	hypothetical protein	{COG1734 DnaK suppressor protein T Signal transduction mechanisms ;}	{NA}	CP010883.1	1153424	1153642	CHN25_01082
IG68	10	Compatibility	group_5274	Accessory	hypothetical protein	{NA}	{NA}	CP010883.1	1152962	1153411	CHN25_01081
IG68	10	Compatibility	group_5704	Accessory	hypothetical protein	{NA}	{NA}	CP010883.1	1154366	1154650	CHN25_01085
IG68	10	Compatibility	group_5854	Accessory	Phage small terminase subunit	{NA}	{NA}	CP010883.1	1149446	1150162	CHN25_01076
IG68	10	Compatibility	group_6528	Accessory	hypothetical protein	{NA}	{NA}	CP010883.1	1153639	1154136	CHN25_01083
IG67	10	Compatibility	group_11151	Accessory	Helix-turn-helix domain protein	{NA}	{NA}	Scaffold4	136242	136436	F1_1_02199
IG67	10	Compatibility	group_4123	Accessory	hypothetical protein	{NA}	{NA}	Scaffold4	133911	135182	F1_1_02198
IG67	10	Compatibility	group_4807	Accessory	Putative prophage CPS-53 integrase	{NA}	{NA}	Scaffold4	131178	132533	F1_1_02196
IG64	10	Compatibility	group_1875	Accessory	Relaxase/Mobilisation nuclease domain protein	{NA}	{NA}	PY194_23	101919	103424	PY194_03464
